# Supplementary material for: Genome-wide analysis of low-dose irradiated male Drosophila melanogaster with extended longevity
Source: Springer Nature journal article supplement (doi:10.1007/s10522-010-9295-2), 2010-07-08
Supplement: MOESM5 [file 10522_2010_9295_MOESM5_ESM.xls]

## Sheet: 15629
Supplementary table 5 Significantly changed genes categorized by GO cellular component
Genome-wide analysis of low-dose irradiated Drosophila melanogaster showing extended longevity; Biogerontology; Seong et al.; Division of Radiation Effect Research, Radiation Health Research Institute, Korea Hydro & Nuclear Power Co., Ltd.; Corresponding e-mail: ywjin@khnp.co.kr
Probe ID	Cont vs. 0.2 Gy	t-test P-value	Flags	Raw	Control	Genbank	Gene Symbol	Name_1	GeneName_1	TopHit_1	Description_1	Description	Product	PubMedID	DBid	GO biological process	GO molecular function	GO cellular component	RefSeq	UniGene	Entrez Gene ID	Pathways	Function
A_09_P166085	1.76834	0.00717874	P	11273	6352.89	NM_169645		CG4843-RC	Tm2	fly|CG4843-RC|ref|NM_169645|dgc|RE15528|gb|AY071087	Tropomyosin-2 (Tropomyosin I). [Source:Uniprot/SWISSPROT;Acc:P09491] [CG4843-RC]	Tropomyosin 2	Tropomyosin 2 CG4843-PA, isoform A [Drosophila melanogaster]	1331746; 1367435; 1706473; 1707678; 1719381; 1909334; 2132732; 2471669; 2823110; 2851721; 2852258; 2986850; 3038522; 3079761; 3097506; 3135237; 3378704; 3693358; 3803921; 4000944; 6098823; 6186817; 6202423; 6316345; 6801424; 7860706; 8109330; 8405675; 8556858; 8589739; 8643453; 8909542; 8988178; 9070325; 9115398; 9254904; 9409684; 9601637; 9866209; 9917396; 10507836; 10980425; 11118879; 11157786;…	Dmel_CG4843	GO:7507(heart development); GO:6936(muscle contraction)	GO:3779(actin binding); GO:5200(structural constituent of cytoskeleton)	GO:5862(muscle thin filament tropomyosin)	NM_079637	Dm.2422	41853
A_09_P020371	0.592908	0.0416301	P	15221.2	26384.8	NM_164750		CG5973-RA	CG5973	fly|CG5973-RA|fly|CG5973-RB|fly|CG5973-RC|ref|NM_164750	CG5973-PB, isoform B [Source:RefSeq_peptide;Acc:NP_723276] [CG5973-RA]	CG5973	CG5973-PA, isoform A [Drosophila melanogaster]		Dmel_CG5973	GO:6732(coenzyme metabolic process); GO:51189(prosthetic group metabolic process); GO:6810(transport)	GO:5386(carrier activity); GO:16918(retinal binding)	GO:5885(Arp2/3 protein complex)	NM_164750	Dm.11343	34023
A_09_P050976	1.55343	0.0254189	P	30169.6	20172.8	NM_001032052		CG33715-RE	Msp-300	fly|CG33715-RE|ref|NM_001032052|dgc|GH02446|gb|BT003623	Muscle-specific protein 300 CG33715-PE, isoform E [Source:RefSeq_peptide;Acc:NP_001027223] [CG33715-RE]	Muscle-specific protein 300	Muscle-specific protein 300 CG33715-PD, isoform D [Drosophila melanogaster]	16337624; 1289062; 7732594; 9013930; 9025063; 10908588; 11486054; 11742088; 11779831; 12351791; 12376554; 12408964; 12417656; 12736298; 12888516	Dmel_CG33715	GO:7049(cell cycle); GO:7059(chromosome segregation); GO:910(cytokinesis); GO:7010(cytoskeleton organization and biogenesis); GO:7498(mesoderm development); GO:7067(mitosis)	GO:3779(actin binding); GO:19237(centromeric DNA binding); GO:8092(cytoskeletal protein binding); GO:3725(double-stranded RNA binding); GO:3676(nucleic acid binding)	GO:15629(actin cytoskeleton); GO:8305(integrin complex)	NM_001032051	Dm.20325	3771968
A_09_P010196	0.637228	0.000456	P	3221.84	5131.48	CG12008-RC		CG12008-RC	kst	fly|CG12008-RC|fly|CG12008-RB|fly|CG12008-RA|fly|CG12008-RD	karst CG12008-PC, isoform C [Source:RefSeq_peptide;Acc:NP_995987] [CG12008-RC]
A_09_P191745	2.0033	0.00440863	P	4711.97	2345.83	NM_057693		CG4799-RA	Pen	fly|CG4799-RA|ref|NM_057693|dgc|LD24935|dgc|LP03126	Importin alpha subunit (Karyopherin alpha subunit) (Pendulin). [Source:Uniprot/SWISSPROT;Acc:P52295] [CG4799-RA]	Pendulin	Pendulin CG4799-PA [Drosophila melanogaster]	12490175; 12435357; 7565597; 7749327; 7790349; 7790350; 8224829; 8417324; 8640222; 9391096; 9396726; 9406612; 9491068; 9540809; 10049924; 10471706; 10842307; 10882518; 11116097; 11429277; 11546751; 12019231; 12042820; 12042821; 12408870; 12626737; 12646868; 12655640; 14704178; 15001111; 15204079; 15922834	Dmel_CG4799	GO:6607(NLS-bearing substrate import into nucleus); GO:8283(cell proliferation); GO:16482(cytoplasmic transport); GO:7303(cytoplasmic transport, nurse cell to oocyte); GO:42332(gravitaxis); GO:48542(lymph gland development); GO:7301(ovarian ring canal formation); GO:6606(protein import into nucleus); GO:59(protein import into nucleus, docking); GO:7291(sperm individualization)	GO:8320(protein carrier activity)	GO:15629(actin cytoskeleton); GO:5737(cytoplasm); GO:5643(nuclear pore); GO:5634(nucleus)	NM_057693	Dm.3560	34338
A_09_P011676	0.439659	0.00657009	P	5106.67	11703.2	NM_079450		CG7445-RA	fln	fly|CG7445-RA|ref|NM_079450|dgc|GH26786|gb|Z18858	Flightin (Muscle protein 27). [Source:Uniprot/SWISSPROT;Acc:P35554] [CG7445-RA]	flightin	flightin CG7445-PA [Drosophila melanogaster]	15671343; 12954604; 7706417; 7776366; 7826316; 8486738; 9622575; 10497331; 11095759; 11134077; 11746221; 12351791; 12431377; 12743041; 12750333; 16086017	Dmel_CG7445	GO:30241(muscle thick filament assembly)		GO:43292(contractile fiber); GO:30016(myofibril); GO:5863(striated muscle thick filament)	NM_079450	Dm.2517	40185
A_09_P219860	1.5812	0.0125223	P	1674.51	1063.38	NM_139603		CG14996-RB	Chd64	fly|CG14996-RB|ref|NM_139603|dgc|GH28730|gb|AY060355	Chd64 CG14996-PB [Source:RefSeq_peptide;Acc:NP_647860] [CG14996-RB]	Chd64	Chd64 CG14996-PB [Drosophila melanogaster]	9778506; 11719206; 12417656; 12586708; 15126400	Dmel_CG14996	GO:6936(muscle contraction); GO:6939(smooth muscle contraction)	GO:3779(actin binding); GO:5200(structural constituent of cytoskeleton)	GO:5865(striated muscle thin filament)	NM_139603	Dm.3312	38490
A_09_P029301	0.657247	0.00046	P	14657.4	22234.5	NM_139603		CG14996-RB	Chd64	fly|CG14996-RB|ref|NM_139603|dgc|GH28730|gb|AY060355	Chd64 CG14996-PB [Source:RefSeq_peptide;Acc:NP_647860] [CG14996-RB]	Chd64	Chd64 CG14996-PB [Drosophila melanogaster]	9778506; 11719206; 12417656; 12586708; 15126400	Dmel_CG14996	GO:6936(muscle contraction); GO:6939(smooth muscle contraction)	GO:3779(actin binding); GO:5200(structural constituent of cytoskeleton)	GO:5865(striated muscle thin filament)	NM_139603	Dm.3312	38490
A_09_P033271	0.620699	0.000296	P	15331.9	24987.3	NM_206146		CG9635-RF	RhoGEF2	fly|CG9635-RF|fly|CG9635-RD|fly|CG9635-RE|ref|NM_206146	RhoGEF2 CG9635-PF, isoform F [Source:RefSeq_peptide;Acc:NP_995868] [CG9635-RF]	RhoGEF2	RhoGEF2 CG9635-PF, isoform F [Drosophila melanogaster]	17202187; 17234948; 15689371; 15699213; 15498490; 15498489; 12421711; 8978055; 9428514; 9436986; 9822573; 9927420; 10047521; 10369659; 10471706; 10556060; 10559939; 10850494; 10880486; 11076763; 11525834; 11702944; 11874917; 12593803; 14668390; 14668391; 14972681; 15238529; 15269282; 15572110; 15834142; 16123312	Dmel_CG9635	GO:6306(DNA methylation); GO:7015(actin filament organization); GO:7375(anterior midgut invagination); GO:6915(apoptosis); GO:7155(cell adhesion); GO:7049(cell cycle); GO:7010(cytoskeleton organization and biogenesis); GO:7369(gastrulation); GO:7377(germ-band extension); GO:6886(intracellular protein transport); GO:7242(intracellular signaling cascade); GO:16331(morphogenesis of embryonic epithel…	GO:3677(DNA binding); GO:5089(Rho guanyl-nucleotide exchange factor activity); GO:19992(diacylglycerol binding); GO:5515(protein binding)	GO:5622(intracellular)	NM_206146	Dm.2959	36915
A_09_P050461	1.87892	0.00556505	P	11048.9	6108.35	NM_001032052		CG33715-RE	Msp-300	fly|CG33715-RE|ref|NM_001032052|dgc|LP10936|gb|AY061561	Muscle-specific protein 300 CG33715-PE, isoform E [Source:RefSeq_peptide;Acc:NP_001027223] [CG33715-RE]	Muscle-specific protein 300	Muscle-specific protein 300 CG33715-PD, isoform D [Drosophila melanogaster]	16337624; 1289062; 7732594; 9013930; 9025063; 10908588; 11486054; 11742088; 11779831; 12351791; 12376554; 12408964; 12417656; 12736298; 12888516	Dmel_CG33715	GO:7049(cell cycle); GO:7059(chromosome segregation); GO:910(cytokinesis); GO:7010(cytoskeleton organization and biogenesis); GO:7498(mesoderm development); GO:7067(mitosis)	GO:3779(actin binding); GO:19237(centromeric DNA binding); GO:8092(cytoskeletal protein binding); GO:3725(double-stranded RNA binding); GO:3676(nucleic acid binding)	GO:15629(actin cytoskeleton); GO:8305(integrin complex)	NM_001032051	Dm.20325	3771968
A_09_P078046	1.58122	0.00874518	P	744.455	472.497	CG31045-RA		CG31045-RA	Mhcl	fly|CG31045-RA|fly|CG31045-RD|fly|CG31045-RG|fly|CG31045-RF	Myosin heavy chain-like CG31045-PC, isoform C [Source:RefSeq_peptide;Acc:NP_732110] [CG31045-RA]
A_09_P166110	1.93582	0.00399437	P	15138.9	7793.46	NM_057693		CG4799-RA	Pen	fly|CG4799-RA|ref|NM_057693|dgc|LD24935|dgc|LP03126	Importin alpha subunit (Karyopherin alpha subunit) (Pendulin). [Source:Uniprot/SWISSPROT;Acc:P52295] [CG4799-RA]	Pendulin	Pendulin CG4799-PA [Drosophila melanogaster]	12490175; 12435357; 7565597; 7749327; 7790349; 7790350; 8224829; 8417324; 8640222; 9391096; 9396726; 9406612; 9491068; 9540809; 10049924; 10471706; 10842307; 10882518; 11116097; 11429277; 11546751; 12019231; 12042820; 12042821; 12408870; 12626737; 12646868; 12655640; 14704178; 15001111; 15204079; 15922834	Dmel_CG4799	GO:6607(NLS-bearing substrate import into nucleus); GO:8283(cell proliferation); GO:16482(cytoplasmic transport); GO:7303(cytoplasmic transport, nurse cell to oocyte); GO:42332(gravitaxis); GO:48542(lymph gland development); GO:7301(ovarian ring canal formation); GO:6606(protein import into nucleus); GO:59(protein import into nucleus, docking); GO:7291(sperm individualization)	GO:8320(protein carrier activity)	GO:15629(actin cytoskeleton); GO:5737(cytoplasm); GO:5643(nuclear pore); GO:5634(nucleus)	NM_057693	Dm.3560	34338
A_09_P029441	1.51685	0.0240017	P	19278.5	12332.1	NM_057693		CG4799-RA	Pen	fly|CG4799-RA|ref|NM_057693|dgc|LD24935|dgc|LP03126	Importin alpha subunit (Karyopherin alpha subunit) (Pendulin). [Source:Uniprot/SWISSPROT;Acc:P52295] [CG4799-RA]	Pendulin	Pendulin CG4799-PA [Drosophila melanogaster]	12490175; 12435357; 7565597; 7749327; 7790349; 7790350; 8224829; 8417324; 8640222; 9391096; 9396726; 9406612; 9491068; 9540809; 10049924; 10471706; 10842307; 10882518; 11116097; 11429277; 11546751; 12019231; 12042820; 12042821; 12408870; 12626737; 12646868; 12655640; 14704178; 15001111; 15204079; 15922834	Dmel_CG4799	GO:6607(NLS-bearing substrate import into nucleus); GO:8283(cell proliferation); GO:16482(cytoplasmic transport); GO:7303(cytoplasmic transport, nurse cell to oocyte); GO:42332(gravitaxis); GO:48542(lymph gland development); GO:7301(ovarian ring canal formation); GO:6606(protein import into nucleus); GO:59(protein import into nucleus, docking); GO:7291(sperm individualization)	GO:8320(protein carrier activity)	GO:15629(actin cytoskeleton); GO:5737(cytoplasm); GO:5643(nuclear pore); GO:5634(nucleus)	NM_057693	Dm.3560	34338
A_09_P010206	1.58766	0.0117468	P	20612.5	12792.4	CG7107-RA		CG7107-RA	up	fly|CG7107-RA|fly|CG7107-RF|fly|CG7107-RG|fly|CG7107-RB	Troponin T, skeletal muscle (Protein upheld) (Protein intended thorax). [Source:Uniprot/SWISSPROT;Acc:P19351] [CG7107-RA]
A_09_P062641	0.582861	0.0193367	P	830.64	1416.18	NM_164758		CG6976-RA	Myo28B1	fly|CG6976-RA|fly|CG6976-RB|ref|NM_144373|ref|NM_164758	Myo28B1 CG6976-PD, isoform D [Source:RefSeq_peptide;Acc:NP_723296] [CG6976-RA]	Myo28B1	Myo28B1 CG6976-PB, isoform B [Drosophila melanogaster]	16055438; 10908588; 11206129; 11294886; 12082124; 12975351	Dmel_CG6976	GO:6886(intracellular protein transport); GO:7605(sensory perception of sound); GO:16192(vesicle-mediated transport); GO:7601(visual perception)	GO:5524(ATP binding); GO:42623(ATPase activity, coupled); GO:3779(actin binding); GO:8092(cytoskeletal protein binding); GO:3774(motor activity); GO:5200(structural constituent of cytoskeleton)	GO:16459(myosin complex)	NM_164758	Dm.3375	53515	KEGG pathway: Purine metabolism 00230
A_09_P010057	1.6381	0.00534671	P	33395.6	19881.5	NM_167607		CG7178-RA	wupA	fly|CG7178-RA|ref|NM_167607|tc|TC208848	Troponin I (Tn I) (Protein wings apart-A) (Protein heldup). [Source:Uniprot/SWISSPROT;Acc:P36188] [CG7178-RA]	wings up A	wings up A CG7178-PC, isoform C [Drosophila melanogaster]	1426637; 1899228; 1908472; 2116353; 2703940; 3135237; 6811687; 7479031; 7680094; 7781915; 7789765; 8052239; 8417324; 8589447; 9585418; 9866209; 9872957; 10085296; 10497190; 10591654; 10880484; 11134077; 11359941; 11703947; 11744370; 11746221; 11782446; 12743041; 12750333; 14718560; 14718563; 14729474; 15051736; 15056610; 15075240; 15527959; 16432241	Dmel_CG7178	GO:48738(cardiac muscle development); GO:7507(heart development); GO:6936(muscle contraction); GO:7517(muscle development); GO:30239(myofibril assembly); GO:7399(nervous system development); GO:45214(sarcomere organization)	GO:3779(actin binding); GO:5200(structural constituent of cytoskeleton); GO:5523(tropomyosin binding)	GO:5861(troponin complex)	NM_078674	Dm.1717	32794
A_09_P010166	1.76688	0.00683512	P	10019.3	5642.97	NM_169645		CG4843-RC	Tm2	fly|CG4843-RC|fly|CG4843-RA|fly|CG4843-RB|ref|NM_169645	Tropomyosin-2 (Tropomyosin I). [Source:Uniprot/SWISSPROT;Acc:P09491] [CG4843-RC]	Tropomyosin 2	Tropomyosin 2 CG4843-PA, isoform A [Drosophila melanogaster]	1331746; 1367435; 1706473; 1707678; 1719381; 1909334; 2132732; 2471669; 2823110; 2851721; 2852258; 2986850; 3038522; 3079761; 3097506; 3135237; 3378704; 3693358; 3803921; 4000944; 6098823; 6186817; 6202423; 6316345; 6801424; 7860706; 8109330; 8405675; 8556858; 8589739; 8643453; 8909542; 8988178; 9070325; 9115398; 9254904; 9409684; 9601637; 9866209; 9917396; 10507836; 10980425; 11118879; 11157786;…	Dmel_CG4843	GO:7507(heart development); GO:6936(muscle contraction)	GO:3779(actin binding); GO:5200(structural constituent of cytoskeleton)	GO:5862(muscle thin filament tropomyosin)	NM_079637	Dm.2422	41853
A_09_P195260	2.11081	0.00131174	P	16094.9	7572.97	NM_057693		CG4799-RA	Pen	fly|CG4799-RA|ref|NM_057693|dgc|LD24935|dgc|LP03126	Importin alpha subunit (Karyopherin alpha subunit) (Pendulin). [Source:Uniprot/SWISSPROT;Acc:P52295] [CG4799-RA]	Pendulin	Pendulin CG4799-PA [Drosophila melanogaster]	12490175; 12435357; 7565597; 7749327; 7790349; 7790350; 8224829; 8417324; 8640222; 9391096; 9396726; 9406612; 9491068; 9540809; 10049924; 10471706; 10842307; 10882518; 11116097; 11429277; 11546751; 12019231; 12042820; 12042821; 12408870; 12626737; 12646868; 12655640; 14704178; 15001111; 15204079; 15922834	Dmel_CG4799	GO:6607(NLS-bearing substrate import into nucleus); GO:8283(cell proliferation); GO:16482(cytoplasmic transport); GO:7303(cytoplasmic transport, nurse cell to oocyte); GO:42332(gravitaxis); GO:48542(lymph gland development); GO:7301(ovarian ring canal formation); GO:6606(protein import into nucleus); GO:59(protein import into nucleus, docking); GO:7291(sperm individualization)	GO:8320(protein carrier activity)	GO:15629(actin cytoskeleton); GO:5737(cytoplasm); GO:5643(nuclear pore); GO:5634(nucleus)	NM_057693	Dm.3560	34338

## Sheet: 16585
Probe ID	Cont vs. 0.2 Gy	t-test P-value	Flags	Raw	Control	Genbank	Gene Symbol	Name_1	GeneName_1	TopHit_1	Description_1	Description	Product	PubMedID	DBid	GO biological process	GO molecular function	GO cellular component	RefSeq	UniGene	Entrez Gene ID	Pathways	Function
A_09_P048856	1.77743	0.000837	P	121.241	68.6047	NM_169854		CG31212-RA	Ino80	fly|CG31212-RA|ref|NM_169854|dgc|SD02886|gb|AY069786	CG31212-PA [Source:RefSeq_peptide;Acc:NP_732413] [CG31212-RA]	CG31212	CG31212-PA [Drosophila melanogaster]		Dmel_CG31212	GO:6357(regulation of transcription from RNA polymerase II promoter)	GO:5524(ATP binding); GO:8026(ATP-dependent helicase activity); GO:3677(DNA binding); GO:3678(DNA helicase activity); GO:4386(helicase activity); GO:3676(nucleic acid binding)		NM_169854	Dm.33518	42314
A_09_P223605	0.610159	0.00591258	P	1397.07	2325.59	NM_166827		CG17743-RA	pho	fly|CG17743-RA|fly|CG17743-RB|ref|NM_079891|ref|NM_166827	Polycomb protein PHO (Protein pleiohomeotic) (Transcription factor YY1 homolog). [Source:Uniprot/SWISSPROT;Acc:Q8ST83] [CG17743-RA]	pleiohomeotic	pleiohomeotic CG17743-PA, isoform A [Drosophila melanogaster]	17158804; 16449654; 16052488; 16077005; 12628927; 12370294; 1350533; 1363229; 1806331; 2500288; 3098596; 4208793; 5569209; 7662368; 7713433; 7854314; 7896097; 7915818; 8013911; 8199052; 8313991; 8825476; 9475733; 9651589; 9651590; 9654032; 9655816; 9691040; 9735366; 10359803; 10373568; 10377289; 10433918; 10471712; 10497332; 10542150; 10545463; 10644409; 10705379; 10753783; 10757791; 10880479; 10…	Dmel_CG17743	GO:8283(cell proliferation); GO:6342(chromatin silencing); GO:16458(gene silencing); GO:45449(regulation of transcription); GO:6357(regulation of transcription from RNA polymerase II promoter); GO:6418(tRNA aminoacylation for protein translation)	GO:5524(ATP binding); GO:3677(DNA binding); GO:4812(aminoacyl-tRNA ligase activity); GO:3700(transcription factor activity); GO:8270(zinc ion binding)	GO:790(nuclear chromatin); GO:5634(nucleus)	NM_079891	Dm.1406	43819

## Sheet: 5694
Probe ID	Cont vs. 0.2 Gy	t-test P-value	Flags	Raw	Control	Genbank	Gene Symbol	Name_1	GeneName_1	TopHit_1	Description_1	Description	Product	PubMedID	DBid	GO biological process	GO molecular function	GO cellular component	RefSeq	UniGene	Entrez Gene ID	Pathways	Function
A_09_P029546	1.74362	0.0131448	P	1414.85	821.848	CG33261-RE		CG33261-RE	Trl	fly|CG33261-RE|fly|CG33261-RC|fly|CG33261-RH|fly|CG33261-RG	Transcription factor GAGA (Trithorax-like protein) (GAGA factor) (GAF) (Adh transcription factor 2) (Neural conserved at 70F). [Source:Uniprot/SWISSPROT;Acc:Q08605] [CG33261-RE]
A_09_P046186	1.53105	0.0160144	P	527.216	347.034	NM_001038926		CG33261-RB	Trl	fly|CG33261-RB|fly|CG33261-RI|ref|NM_206356|ref|NM_001038926	Transcription factor GAGA (Trithorax-like protein) (GAGA factor) (GAF) (Adh transcription factor 2) (Neural conserved at 70F). [Source:Uniprot/SWISSPROT;Acc:Q08605] [CG33261-RB]	Trithorax-like	Trithorax-like CG33261-PB, isoform B [Drosophila melanogaster]	17344416; 16936828; 1408750; 1437559; 1457465; 1644294; 1737619; 1899487; 1903757; 1985916; 2370868; 2501151; 2897243; 7498790; 7504178; 7590251; 7613086; 7615662; 7619475; 7630725; 7662368; 7737124; 7744251; 7758950; 7774579; 7780729; 7813435; 7935842; 7956031; 7958847; 7984422; 8097276; 8107820; 8107823; 8274141; 8307350; 8359013; 8382174; 8474442; 8521501; 8543159; 8562910; 8608939; 8610125; 8…	Dmel_CG33261	GO:7549(dosage compensation); GO:6325(establishment and/or maintenance of chromatin architecture); GO:280(nuclear division); GO:45893(positive regulation of transcription, DNA-dependent); GO:45449(regulation of transcription); GO:6357(regulation of transcription from RNA polymerase II promoter); GO:35186(syncytial blastoderm mitotic cell cycle)	GO:3677(DNA binding); GO:3702(RNA polymerase II transcription factor activity); GO:5515(protein binding); GO:3704(specific RNA polymerase II transcription factor activity); GO:8270(zinc ion binding)	GO:5721(centric heterochromatin); GO:785(chromatin); GO:5634(nucleus)	NM_206356	Dm.7610	2768981
A_09_P047821	1.61219	0.0069355	P	20357.8	12512.3	NM_163892		CG32491-RS	mod(mdg4)	fly|CG32491-RS|ref|NM_163892|gb|BT029677|gb|AJ277179	Modifier of mdg4. [Source:Uniprot/SWISSPROT;Acc:Q86B87] [CG32491-RS]	modifier of mdg4	modifier of mdg4 CG32491-PR, isoform R [Drosophila melanogaster]	17101769; 16628226; 15846993; 15520256; 12856417; 12723696; 12783795; 11973303; 1446816; 1473720; 2162761; 2558282; 7613086; 7637775; 7664338; 7761470; 7780729; 7935842; 7958847; 8248257; 8382174; 8405976; 8639163; 8722175; 8790337; 8842142; 8852842; 8978055; 8985188; 9017397; 9111355; 9130717; 9178008; 9286681; 9362473; 9439572; 9491892; 9504920; 9590167; 9649529; 9878044; 9880764; 9927464; 1020…	Dmel_CG32491	GO:6333(chromatin assembly or disassembly); GO:6325(establishment and/or maintenance of chromatin architecture); GO:8354(germ cell migration); GO:6917(induction of apoptosis); GO:6997(nuclear organization and biogenesis); GO:9993(oogenesis (sensu Insecta)); GO:42981(regulation of apoptosis); GO:1672(regulation of chromatin assembly or disassembly); GO:6357(regulation of transcription from RNA pol…	GO:3702(RNA polymerase II transcription factor activity); GO:3682(chromatin binding); GO:8195(phosphatidate phosphatase activity); GO:5515(protein binding)	GO:785(chromatin); GO:5634(nucleus); GO:5886(plasma membrane); GO:5700(polytene chromosome)	NM_163877	Dm.20407	49228	KEGG pathway: Ether lipid metabolism 00565; KEGG pathway: Glycerolipid metabolism 00561; KEGG pathway: Glycerophospholipid metabolism 00564; KEGG pathway: Sphingolipid metabolism 00600
A_09_P148930	1.52722	0.0325109	P	1608.78	1093.63	TC209676		TC209676	TC209676	tc|TC209676	BAFL_DROME (Q9VLU0) BAF-like protein CG7380, complete [TC209676]
A_09_P009631	1.82188	0.00119054	P	169.901	95.4793	CG8068-RC		CG8068-RC	Su(var)2-10	fly|CG8068-RC|fly|CG8068-RD|fly|CG8068-RA|fly|CG8068-RG	Suppressor of variegation 2-10 CG8068-PA, isoform A [Source:RefSeq_peptide;Acc:NP_523664] [CG8068-RC]
A_09_P060196	1.53442	0.0156478	P	544.276	358.99	CG33907-RA		CG33907-RA	His4:CG33907	fly|CG33907-RA|fly|CG33871-RA|fly|CG33873-RA|fly|CG33875-RA	Histone H4. [Source:Uniprot/SWISSPROT;Acc:P84040] [CG33907-RA]
A_09_P152485	1.54287	0.0139671	P,M	41232.2	26811.9	NM_142799		CG7046-RA	CG7046	fly|CG7046-RA|ref|NM_142799|dgc|AT28425|gb|AY070828	CG7046-PA [Source:RefSeq_peptide;Acc:NP_651056] [CG7046-RA]	CG7046	CG7046-PA [Drosophila melanogaster]	16299391	Dmel_CG7046	GO:6355(regulation of transcription, DNA-dependent)	GO:3677(DNA binding)	GO:785(chromatin); GO:5634(nucleus)	NM_142799	Dm.6264	42651
A_09_P168520	0.592855	0.00450208	P	2908.43	5029.68	NM_169563		CG3041-RA	Orc2	fly|CG3041-RA|ref|NM_169563|dgc|GH13824|gb|U43504	Origin recognition complex subunit 2 (DmORC2). [Source:Uniprot/SWISSPROT;Acc:Q24168] [CG3041-RA]	Origin recognition complex subunit 2	Origin recognition complex subunit 2 CG3041-PA [Drosophila melanogaster]	16343659; 1516820; 1908228; 2498166; 3085087; 5002822; 6813163; 7502078; 7502079; 8325487; 8596901; 9108074; 9363940; 9499407; 9590165; 9613205; 9679132; 10096018; 10197983; 10228158; 10346817; 10393187; 10402184; 10541547; 10753776; 10753785; 10898791; 11024168; 11137005; 11231579; 11290306; 11408576; 11593009; 11748144; 12001264; 12091301; 12403810; 12490953; 12510197; 12586708; 12808023; 12852…	Dmel_CG3041	GO:6260(DNA replication); GO:6270(DNA replication initiation); GO:6261(DNA-dependent DNA replication); GO:7307(chorion gene amplification); GO:6342(chromatin silencing); GO:30261(chromosome condensation); GO:7076(mitotic chromosome condensation); GO:7052(mitotic spindle organization and biogenesis); GO:6508(proteolysis)	GO:3677(DNA binding); GO:3688(DNA replication origin binding); GO:16491(oxidoreductase activity); GO:4289(subtilase activity)	GO:5664(nuclear origin of replication recognition complex)	NM_169563	Dm.2636	41703
A_09_P029951	1.53046	0.00900945	P	20984.8	13847.1	NM_143745		CG18389-RA	Eip93F	fly|CG18389-RA|ref|NM_143745|gb|U25686|tc|TC217248	Eip93F CG18389-PA [Source:RefSeq_peptide;Acc:NP_652002] [CG18389-RA]	Eip93F	Eip93F CG18389-PA [Drosophila melanogaster]	12297099; 11262243; 7550245; 7556910; 7954827; 8521511; 8783940; 8913033; 9264248; 9521911; 10078197; 10354477; 10419696; 10772791; 10882130; 10983989; 11102824; 11494315; 11703937; 11976954; 12095613; 12453466; 12548287; 12593803; 12593804; 12852852; 14668412; 15221030; 15657059; 16264191	Dmel_CG18389	GO:48102(autophagic cell death); GO:6914(autophagy); GO:35072(ecdysone-mediated induction of salivary gland cell autophagic cell death); GO:8628(induction of apoptosis by hormones); GO:35069(larval midgut histolysis); GO:6911(phagocytosis, engulfment); GO:45893(positive regulation of transcription, DNA-dependent); GO:45449(regulation of transcription); GO:35071(salivary gland cell autophagic cell…	GO:3677(DNA binding); GO:3700(transcription factor activity)	GO:5634(nucleus); GO:5700(polytene chromosome)	NM_143745	Dm.21704	44936
A_09_P032611	1.71829	0.00816595	P	10044.8	6071.91	NM_079738		CG6768-RA	DNApol-epsilon	fly|CG6768-RA|ref|NM_079738|dgc|SD09005|gb|AY061620	DNA polymerase CG6768-PA [Source:RefSeq_peptide;Acc:NP_524462] [CG6768-RA]	DNA polymerase epsilon	DNA polymerase epsilon CG6768-PA [Drosophila melanogaster]	8785516; 9016770; 11054539; 11579108; 12975318; 16278345	Dmel_CG6768	GO:6281(DNA repair); GO:6261(DNA-dependent DNA replication)	GO:8296(3'-5'-exodeoxyribonuclease activity); GO:3677(DNA binding); GO:3893(epsilon DNA polymerase activity); GO:3676(nucleic acid binding); GO:166(nucleotide binding)	GO:8622(epsilon DNA polymerase complex); GO:5634(nucleus)	NM_079738	Dm.1294	42758	KEGG pathway: DNA polymerase 03030; KEGG pathway: Purine metabolism 00230; KEGG pathway: Pyrimidine metabolism 00240
A_09_P009866	0.636326	0.000599	P	3181.37	4991.78	NM_170564		CG1856-RA	ttk	fly|CG1856-RA|fly|CG1856-RE|fly|CG1856-RB|ref|NM_170564	Protein tramtrack, beta isoform (Tramtrack p69) (Repressor protein fushi tarazu). [Source:Uniprot/SWISSPROT;Acc:P17789] [CG1856-RA]	tramtrack	tramtrack CG1856-PE, isoform E [Drosophila melanogaster]	16542414; 15829522; 12702656; 12204250; 12128207; 12490195; 12447387; 14701830; 1372245; 1457380; 1457465; 1496011; 1640455; 1703680; 2001679; 2104801; 2193131; 7498790; 7504178; 7557390; 7600986; 7671793; 7748559; 7835340; 7893132; 7935842; 7938017; 7956024; 7958847; 8005445; 8031300; 8060613; 8062827; 8101825; 8173320; 8223261; 8247159; 8343140; 8355700; 8504931; 8557044; 8643523; 8654928; 8660…	Dmel_CG1856	GO:45467(R7 development); GO:1709(cell fate determination); GO:6333(chromatin assembly or disassembly); GO:46843(dorsal appendage formation); GO:122(negative regulation of transcription from RNA polymerase II promoter); GO:7422(peripheral nervous system development); GO:6357(regulation of transcription from RNA polymerase II promoter); GO:7530(sex determination); GO:19226(transmission of nerve im…	GO:5515(protein binding); GO:3704(specific RNA polymerase II transcription factor activity); GO:16564(transcriptional repressor activity); GO:8270(zinc ion binding)	GO:5634(nucleus); GO:5700(polytene chromosome)	NM_170566	Dm.1526	48317
A_09_P050011	0.562513	0.0374049	P	126.673	242.553	NM_165180		CG11397-RA	glu	fly|CG11397-RA|ref|NM_165180|dgc|LD20207|dgc|LD25919	gluon CG11397-PA [Source:RefSeq_peptide;Acc:NP_723996] [CG11397-RA]	gluon	gluon CG11397-PA [Drosophila melanogaster]	7789767; 9584093; 10471706; 11102367; 11258476; 11267866; 12001264; 12091301; 12586708; 14630943; 14635253; 14668407; 14970188; 15998724; 16230526; 16272408	Dmel_CG11397	GO:6333(chromatin assembly or disassembly); GO:7067(mitosis); GO:7076(mitotic chromosome condensation); GO:70(mitotic sister chromatid segregation); GO:7422(peripheral nervous system development); GO:819(sister chromatid segregation)	GO:5524(ATP binding); GO:16887(ATPase activity); GO:3677(DNA binding); GO:3682(chromatin binding); GO:166(nucleotide binding); GO:5515(protein binding)	GO:785(chromatin); GO:5694(chromosome); GO:796(condensin complex); GO:5737(cytoplasm); GO:5634(nucleus)	NM_165180	Dm.3063	35001
A_09_P127285	1.52734	0.018136	P	279.417	185.748	NM_137773		CG13493-RA	comr	fly|CG13493-RA|ref|NM_137773|dgc|AT27686|gb|AY119451	cookie monster CG13493-PA [Source:RefSeq_peptide;Acc:NP_611617] [CG13493-RA]	cookie monster	cookie monster CG13493-PA [Drosophila melanogaster]	12490562; 12756169; 12756170; 15084455	Dmel_CG13493	GO:45944(positive regulation of transcription from RNA polymerase II promoter); GO:7283(spermatogenesis)	GO:16563(transcriptional activator activity)	GO:785(chromatin); GO:5634(nucleus)	NM_137773	Dm.13569	37492
A_09_P009971	0.591001	0.000158	P	6595.03	11244.1	NM_057433		CG4380-RA	usp	fly|CG4380-RA|ref|NM_057433|dgc|LD09973|gb|X52591	Protein ultraspiracle (XR2C) (Chorion factor 1). [Source:Uniprot/SWISSPROT;Acc:P20153] [CG4380-RA]	ultraspiracle	ultraspiracle CG4380-PA [Drosophila melanogaster]	14594447; 12674500; 12958367; 12473098; 12084064; 11804781; 1280827; 1312460; 1327536; 1330482; 1638122; 1709303; 1814368; 1908228; 1913820; 1913821; 1925579; 2120114; 2165589; 2169594; 2499512; 3928431; 6479445; 7479823; 7479849; 7550245; 7644522; 7671827; 7729584; 7743931; 7867504; 7882975; 7896133; 7969130; 7980478; 7993620; 8007953; 8068883; 8088449; 8247157; 8253272; 8293994; 8323552; 838527…	Dmel_CG4380	GO:7298(border follicle cell migration (sensu Insecta)); GO:48813(dendrite morphogenesis); GO:35072(ecdysone-mediated induction of salivary gland cell autophagic cell death); GO:6629(lipid metabolic process); GO:7552(metamorphosis); GO:45596(negative regulation of cell differentiation); GO:45892(negative regulation of transcription, DNA-dependent); GO:16322(neuron remodeling); GO:45941(positive r…	GO:3677(DNA binding); GO:4884(ecdysteroid hormone receptor activity); GO:5500(juvenile hormone binding); GO:4879(ligand-dependent nuclear receptor activity); GO:5515(protein binding); GO:43565(sequence-specific DNA binding); GO:3700(transcription factor activity); GO:8270(zinc ion binding)	GO:30425(dendrite); GO:8230(ecdysone receptor holocomplex); GO:5634(nucleus); GO:5700(polytene chromosome)	NM_057433	Dm.25	31165
A_09_P070256	1.67683	0.00218918	P	36467.7	21597.9	NM_142799		CG7046-RA	CG7046	fly|CG7046-RA|ref|NM_142799|dgc|AT28425|gb|AY070828	CG7046-PA [Source:RefSeq_peptide;Acc:NP_651056] [CG7046-RA]	CG7046	CG7046-PA [Drosophila melanogaster]	16299391	Dmel_CG7046	GO:6355(regulation of transcription, DNA-dependent)	GO:3677(DNA binding)	GO:785(chromatin); GO:5634(nucleus)	NM_142799	Dm.6264	42651
A_09_P067331	0.64332	0.0137205	P	6170.92	9587.77	NM_132028		CG15929-RA	lin-52	fly|CG15929-RA|ref|NM_132028|gb|AY788901|gb|BT022297	lin-52 CG15929-PA [Source:RefSeq_peptide;Acc:NP_572256] [CG15929-RA]	lin-52	lin-52 CG15929-PA [Drosophila melanogaster]	15545624	Dmel_CG15929	GO:122(negative regulation of transcription from RNA polymerase II promoter)		GO:31523(Myb complex)	NM_132028	Dm.23770	31499
A_09_P145280	1.78171	0.00478952	P	17619.2	9923.06	NM_143745		CG18389-RA	Eip93F	fly|CG18389-RA|ref|NM_143745|tc|TC217248	Eip93F CG18389-PA [Source:RefSeq_peptide;Acc:NP_652002] [CG18389-RA]	Eip93F	Eip93F CG18389-PA [Drosophila melanogaster]	12297099; 11262243; 7550245; 7556910; 7954827; 8521511; 8783940; 8913033; 9264248; 9521911; 10078197; 10354477; 10419696; 10772791; 10882130; 10983989; 11102824; 11494315; 11703937; 11976954; 12095613; 12453466; 12548287; 12593803; 12593804; 12852852; 14668412; 15221030; 15657059; 16264191	Dmel_CG18389	GO:48102(autophagic cell death); GO:6914(autophagy); GO:35072(ecdysone-mediated induction of salivary gland cell autophagic cell death); GO:8628(induction of apoptosis by hormones); GO:35069(larval midgut histolysis); GO:6911(phagocytosis, engulfment); GO:45893(positive regulation of transcription, DNA-dependent); GO:45449(regulation of transcription); GO:35071(salivary gland cell autophagic cell…	GO:3677(DNA binding); GO:3700(transcription factor activity)	GO:5634(nucleus); GO:5700(polytene chromosome)	NM_143745	Dm.21704	44936
A_09_P048856	1.77743	0.000837	P	121.241	68.6047	NM_169854		CG31212-RA	Ino80	fly|CG31212-RA|ref|NM_169854|dgc|SD02886|gb|AY069786	CG31212-PA [Source:RefSeq_peptide;Acc:NP_732413] [CG31212-RA]	CG31212	CG31212-PA [Drosophila melanogaster]		Dmel_CG31212	GO:6357(regulation of transcription from RNA polymerase II promoter)	GO:5524(ATP binding); GO:8026(ATP-dependent helicase activity); GO:3677(DNA binding); GO:3678(DNA helicase activity); GO:4386(helicase activity); GO:3676(nucleic acid binding)		NM_169854	Dm.33518	42314
A_09_P223605	0.610159	0.00591258	P	1397.07	2325.59	NM_166827		CG17743-RA	pho	fly|CG17743-RA|fly|CG17743-RB|ref|NM_079891|ref|NM_166827	Polycomb protein PHO (Protein pleiohomeotic) (Transcription factor YY1 homolog). [Source:Uniprot/SWISSPROT;Acc:Q8ST83] [CG17743-RA]	pleiohomeotic	pleiohomeotic CG17743-PA, isoform A [Drosophila melanogaster]	17158804; 16449654; 16052488; 16077005; 12628927; 12370294; 1350533; 1363229; 1806331; 2500288; 3098596; 4208793; 5569209; 7662368; 7713433; 7854314; 7896097; 7915818; 8013911; 8199052; 8313991; 8825476; 9475733; 9651589; 9651590; 9654032; 9655816; 9691040; 9735366; 10359803; 10373568; 10377289; 10433918; 10471712; 10497332; 10542150; 10545463; 10644409; 10705379; 10753783; 10757791; 10880479; 10…	Dmel_CG17743	GO:8283(cell proliferation); GO:6342(chromatin silencing); GO:16458(gene silencing); GO:45449(regulation of transcription); GO:6357(regulation of transcription from RNA polymerase II promoter); GO:6418(tRNA aminoacylation for protein translation)	GO:5524(ATP binding); GO:3677(DNA binding); GO:4812(aminoacyl-tRNA ligase activity); GO:3700(transcription factor activity); GO:8270(zinc ion binding)	GO:790(nuclear chromatin); GO:5634(nucleus)	NM_079891	Dm.1406	43819

## Sheet: 16591
Probe ID	Cont vs. 0.2 Gy	t-test P-value	Flags	Raw	Control	Genbank	Gene Symbol	Name_1	GeneName_1	TopHit_1	Description_1	Description	Product	PubMedID	DBid	GO biological process	GO molecular function	GO cellular component	RefSeq	UniGene	Entrez Gene ID	Pathways	Function
A_09_P211280	0.570488	0.00346084	P	3150.39	5580.02	EL870229		EL870229	Rpb7	ug|EL870229	IP02322.3prime IP Drosophila melanogaster iPCR Amplified Library Drosophila melanogaster cDNA clone IP02322 3, mRNA sequence [EL870229]	Rpb7								Dm.28184
A_09_P144990	0.643774	0.0138533	P	16206.5	25162.1	TC216733		TC216733	TC216733	tc|TC216733	Q9VC48_DROME (Q9VC48) CG13630-PA (GH13823p), complete [TC216733]
A_09_P078906	0.666099	0.0169691	P	5188.64	7810.49	NM_206654		CG18009-RE	Trf2	fly|CG18009-RE|ref|NM_078529|ref|NM_206654|dgc|LD27895	The gene TATA box binding protein-related factor 2 is referred to in FlyBase by the symbol Trf2 (CG18009, FBgn0026758). It has the cytological map location 7E7-7E9. Its sequence location is X:8317598..8324233. Its molecular function is described as:...	TATA box binding protein-related factor 2	TATA box binding protein-related factor 2 CG18009-PD, isoform D [Drosophila melanogaster]	17015475; 12459787; 10220372; 10908585; 11051541; 11744370; 11825878; 12782648; 12878007; 15175253; 15501232	Dmel_CG18009	GO:6357(regulation of transcription from RNA polymerase II promoter); GO:6367(transcription initiation from RNA polymerase II promoter)	GO:3677(DNA binding); GO:16251(general RNA polymerase II transcription factor activity); GO:3704(specific RNA polymerase II transcription factor activity)	GO:5669(transcription factor TFIID complex); GO:5667(transcription factor complex)	NM_078529	Dm.2938	31773
A_09_P012146	0.635278	0.000418	P	15087	23980.4	CG5444-RC		CG5444-RC	Taf4	fly|CG5444-RC|fly|CG5444-RD|fly|CG5444-RE|fly|CG5444-RB	Transcription initiation factor TFIID subunit 4 (Transcription initiation factor TFIID 110 kDa subunit) (p110) (TAFII-110) (110 kDa TBP-associated factor). [Source:Uniprot/SWISSPROT;Acc:P47825] [CG5444-RC]

## Sheet: 5783
Probe ID	Cont vs. 0.2 Gy	t-test P-value	Flags	Raw	Control	Genbank	Gene Symbol	Name_1	GeneName_1	TopHit_1	Description_1	Description	Product	PubMedID	DBid	GO biological process	GO molecular function	GO cellular component	RefSeq	UniGene	Entrez Gene ID	Pathways	Function
A_09_P042766	2.13016	0.00110848	P	11574	5258.77	CG4147-RB		CG4147-RB	Hsc70-3	fly|CG4147-RB|fly|CG4147-RD|fly|CG4147-RA|fly|CG4147-RC	Heat shock 70 kDa protein cognate 3 precursor (78 kDa glucose- regulated protein homolog) (GRP 78) (Heat shock protein cognate 72). [Source:Uniprot/SWISSPROT;Acc:P29844] [CG4147-RB]
A_09_P077126	1.87035	0.0158207	P	8124.32	4283.13	CG2331-RD		CG2331-RD	TER94	fly|CG2331-RD|fly|CG2331-RA|fly|CG2331-RC|fly|CG2331-RB	This gene is referred to in FlyBase by the symbol TER94 (CG2331, FBgn0024923). It has the cytological map location 46D1. Its sequence location is 2R:5876666..5881072. Its molecular function is described as: ATPase activity; ATP binding; ATP-dependent...
A_09_P215075	2.46206	0.0259275	P,A	52.0307	22.3273	TC203089		TC203089	TC203089	tc|TC203089	Q5U0U9_DROME (Q5U0U9) AT25839p, complete [TC203089]
A_09_P184440	1.7075	0.00840192	P	4635.47	2752.63	NM_164619		CG31650-RA	CG31650	fly|CG31650-RA|fly|CG31650-RB|fly|CG31650-RC|ref|NM_164619	CG31650-PC, isoform C [Source:RefSeq_peptide;Acc:NP_608899] [CG31650-RA]	CG31650	CG31650-PA, isoform A [Drosophila melanogaster]		Dmel_CG31650	GO:19722(calcium-mediated signaling)	GO:5509(calcium ion binding); GO:5516(calmodulin binding)	GO:5788(endoplasmic reticulum lumen)	NM_164619	Dm.19783	326150
A_09_P064826	1.90078	3.66e-05	P	12306.4	6413.08	NM_132339		CG32701-RA	l(1)G0320	fly|CG32701-RA|ref|NM_132339|dgc|LD26546|gb|AY069541	lethal (1) G0320 CG32701-PA [Source:RefSeq_peptide;Acc:NP_572567] [CG32701-RA]	lethal (1) G0320	lethal (1) G0320 CG32701-PA [Drosophila melanogaster]	11744370	Dmel_CG32701	GO:6605(protein targeting); GO:6412(translation); GO:16192(vesicle-mediated transport)	GO:5509(calcium ion binding); GO:5048(signal sequence binding)	GO:5785(signal recognition particle receptor complex)	NM_132339	Dm.2084	326234
A_09_P218260	0.620478	0.0112669	P	16824.3	27035.9	ens		CG15539-RA	CG15539	ens|CG15539-RA|tc|TC204722	CG15539-PA [Source:RefSeq_peptide;Acc:NP_651804] [CG15539-RA]
A_09_P052341	1.6063	0.0175639	P	1796.19	1140.78	CG3725-RF		CG3725-RF	Ca-P60A	fly|CG3725-RF|fly|CG3725-RC|fly|CG3725-RB|fly|CG3725-RE	Calcium-transporting ATPase sarcoplasmic/endoplasmic reticulum type (EC 3.6.3.8) (Calcium pump). [Source:Uniprot/SWISSPROT;Acc:P22700] [CG3725-RF]
A_09_P043876	1.53947	0.0146061	P	20890.3	13162.1	NM_079683		CG4550-RA	ninaE	fly|CG4550-RA|ref|NM_079683|dgc|RH01460|dgc|HL01686	Opsin Rh1 (Outer R1-R6 photoreceptor cells opsin) (Neither inactivation nor afterpotential E protein). [Source:Uniprot/SWISSPROT;Acc:P06002] [CG4550-RA]	neither inactivation nor afterpotential E	neither inactivation nor afterpotential E CG4550-PA [Drosophila melanogaster]	16756553; 15014127; 14769922; 1339673; 1398053; 1403087; 1422119; 1431838; 1534022; 1551579; 1608933; 1644830; 1689056; 1707759; 1726765; 1833511; 1838762; 1859395; 1913822; 1982113; 2010085; 2105166; 2105491; 2110249; 2117644; 2140105; 2163342; 2361011; 2437266; 2484341; 2521839; 2528612; 2580638; 2768273; 2953598; 2966681; 2968518; 2975615; 2985266; 3040524; 3097245; 3117994; 3930500; 6770840; …	Dmel_CG4550	GO:7186(G-protein coupled receptor protein signaling pathway); GO:8344(adult locomotory behavior); GO:8594(photoreceptor cell morphogenesis); GO:7602(phototransduction); GO:42052(rhabdomere development); GO:7601(visual perception)	GO:8020(G-protein coupled photoreceptor activity); GO:4930(G-protein coupled receptor activity)	GO:16023(cytoplasmic membrane-bound vesicle); GO:16027(inaD signaling complex); GO:16021(integral to membrane); GO:5771(multivesicular body); GO:16028(rhabdomere); GO:5791(rough endoplasmic reticulum); GO:5767(secondary lysosome); GO:16029(subrhabdomeral cisterna)	NM_079683	Dm.6744	42367
A_09_P116640	0.646745	0.0143017	P	653.302	1017.27	NM_057470		CG9191-RA	Klp61F	fly|CG9191-RA|ref|NM_057470|dgc|LD15641|gb|AY069442	Bipolar kinesin KRP-130 (Kinesin-like protein Klp61F). [Source:Uniprot/SWISSPROT;Acc:P46863] [CG9191-RA]	Kinesin-like protein at 61F	Kinesin-like protein at 61F CG9191-PA [Drosophila melanogaster]	15367580; 1924306; 7787059; 7983154; 8083185; 8227131; 8538794; 8589456; 8918872; 9067597; 9268050; 9484596; 9584098; 9585508; 9718363; 9751878; 9869630; 9885249; 10073938; 10231358; 10471706; 10523496; 10559864; 10580983; 10637305; 10779909; 11034894; 11470815; 11739796; 12586708; 12975346; 13679514; 14527345; 15066637; 15182695; 15501232; 15522967; 15927177; 15998724; 16303556; 16452979	Dmel_CG9191	GO:7030(Golgi organization and biogenesis); GO:7049(cell cycle); GO:51299(centrosome separation); GO:7018(microtubule-based movement); GO:7100(mitotic centrosome separation); GO:7052(mitotic spindle organization and biogenesis); GO:6605(protein targeting)	GO:5524(ATP binding); GO:3777(microtubule motor activity); GO:3774(motor activity); GO:8574(plus-end-directed microtubule motor activity); GO:5200(structural constituent of cytoskeleton)	GO:5794(Golgi apparatus); GO:5737(cytoplasm); GO:5783(endoplasmic reticulum); GO:5871(kinesin complex); GO:5875(microtubule associated complex); GO:5873(plus-end kinesin complex); GO:5819(spindle)	NM_057470	Dm.804	38135
A_09_P213800	0.600196	0.0312974	P	16300.6	28488.8	EL886209		EL886209	ORMDL	ug|EL886209	IP17488.3prime IP Drosophila melanogaster iPCR Amplified Library Drosophila melanogaster cDNA clone IP17488 3, mRNA sequence [EL886209]	ORMDL								Dm.15066
A_09_P013056	1.66598	0.0474964	P	4742.2	2844.47	CG10844-RA		CG10844-RA	Rya-r44F	fly|CG10844-RA|fly|CG10844-RC|fly|CG10844-RB|fly|CG10844-RD	Ryanodine receptor 44F. [Source:Uniprot/SWISSPROT;Acc:Q24498] [CG10844-RA]
A_09_P071626	1.7061	0.0382477	P	17613.4	10216.7	NM_143134		CG11909-RA	CG11909	fly|CG11909-RA|ref|NM_143134|gb|BT023924	CG11909-PA [Source:RefSeq_peptide;Acc:NP_651391] [CG11909-RA]	CG11909	CG11909-PA [Drosophila melanogaster]	12417656; 15324670	Dmel_CG11909	GO:5996(monosaccharide metabolic process); GO:5976(polysaccharide metabolic process)	GO:4558(alpha-glucosidase activity)	GO:17177(alpha-glucosidase II complex)	NM_143134	Dm.31344	43072
A_09_P193670	1.92302	0.0201824	P	19868.6	10005.7	NM_079569		CG9429-RA	Crc	fly|CG9429-RA|ref|NM_079569|dgc|RE50082|gb|AB000718	Calreticulin precursor (CRP55) (Calregulin) (HACBP). [Source:Uniprot/SWISSPROT;Acc:P29413] [CG9429-RA]	Calreticulin	Calreticulin CG9429-PA [Drosophila melanogaster]	17137576; 14508319; 12756487; 1296819; 2593843; 9218712; 9275195; 9409832; 9461212; 9461448; 9778506; 10049161; 11102367; 11792861; 11861563; 12116476; 12408803; 12524340; 12930747; 12930748; 12932322; 15238527; 15716490	Dmel_CG9429	GO:7417(central nervous system development); GO:6887(exocytosis); GO:6886(intracellular protein transport); GO:42048(olfactory behavior); GO:7422(peripheral nervous system development); GO:6457(protein folding)	GO:5509(calcium ion binding); GO:51082(unfolded protein binding)	GO:5788(endoplasmic reticulum lumen)	NM_079569	Dm.2457	41166
A_09_P198400	1.64015	0.0102723	P	2195.94	1339.9	NM_079105		CG4084-RA	l(2)not	fly|CG4084-RA|ref|NM_079105|dgc|SD03142|gb|BT024214	Lethal(2)neighbour of tid protein (NOT56) (NOT45). [Source:Uniprot/SWISSPROT;Acc:Q27333] [CG4084-RA]	lethal (2) neighbor of tid	lethal (2) neighbor of tid CG4084-PA [Drosophila melanogaster]	7758246; 8666267; 8809105; 9342399; 9373138; 10368435; 11782446; 12464307; 15020472	Dmel_CG4084		GO:30(mannosyltransferase activity)	GO:30176(integral to endoplasmic reticulum membrane)	NM_079105	Dm.2569	37754	KEGG pathway: Glycan structures - biosynthesis 1 01030; KEGG pathway: N-Glycan biosynthesis 00510
A_09_P166825	1.76982	0.0102031	P	12282.5	6720.34	NM_079569		CG9429-RA	Crc	fly|CG9429-RA|ref|NM_079569|dgc|RE50082|gb|AB000718	Calreticulin precursor (CRP55) (Calregulin) (HACBP). [Source:Uniprot/SWISSPROT;Acc:P29413] [CG9429-RA]	Calreticulin	Calreticulin CG9429-PA [Drosophila melanogaster]	17137576; 14508319; 12756487; 1296819; 2593843; 9218712; 9275195; 9409832; 9461212; 9461448; 9778506; 10049161; 11102367; 11792861; 11861563; 12116476; 12408803; 12524340; 12930747; 12930748; 12932322; 15238527; 15716490	Dmel_CG9429	GO:7417(central nervous system development); GO:6887(exocytosis); GO:6886(intracellular protein transport); GO:42048(olfactory behavior); GO:7422(peripheral nervous system development); GO:6457(protein folding)	GO:5509(calcium ion binding); GO:51082(unfolded protein binding)	GO:5788(endoplasmic reticulum lumen)	NM_079569	Dm.2457	41166
A_09_P173920	1.61781	0.0110826	P	1527.09	940.936	CG4147-RB		CG4147-RB	Hsc70-3	fly|CG4147-RB|fly|CG4147-RD|fly|CG4147-RA|fly|CG4147-RC	Heat shock 70 kDa protein cognate 3 precursor (78 kDa glucose- regulated protein homolog) (GRP 78) (Heat shock protein cognate 72). [Source:Uniprot/SWISSPROT;Acc:P29844] [CG4147-RB]
A_09_P103830	0.656425	0.0154496	P	1827.49	2767.91	AJ313085		AJ313085	PEK	gb|AJ313085|tc|TC195328	Drosophila melanogaster mRNA for eukaryotic initiation factor eIF-2 alpha kinase (DPERK gene). [AJ313085]	PEK	PEK CG2087-PA [Drosophila melanogaster]	10677345; 12091301; 12605680; 12865422; 15020472	Dmel_CG2087	GO:6983(ER overload response); GO:6118(electron transport); GO:17148(negative regulation of protein biosynthetic process); GO:6468(protein amino acid phosphorylation); GO:6986(response to unfolded protein); GO:6412(translation)	GO:5524(ATP binding); GO:4686(eukaryotic elongation factor-2 kinase activity); GO:4672(protein kinase activity); GO:4702(receptor signaling protein serine/threonine kinase activity); GO:3743(translation initiation factor activity)	GO:5783(endoplasmic reticulum); GO:5788(endoplasmic reticulum lumen)	NM_141281	Dm.3303	40653	KEGG pathway: Benzoate degradation via CoA ligation 00632; KEGG pathway: Inositol phosphate metabolism 00562; KEGG pathway: Nicotinate and nicotinamide metabolism 00760; KEGG pathway: Phosphatidylinositol signaling system 04070

## Sheet: 5576
Probe ID	Cont vs. 0.2 Gy	t-test P-value	Flags	Raw	Control	Genbank	Gene Symbol	Name_1	GeneName_1	TopHit_1	Description_1	Description	Product	PubMedID	DBid	GO biological process	GO molecular function	GO cellular component	RefSeq	UniGene	Entrez Gene ID	Pathways	Function
A_09_P043376	1.7393	0.000256	P	24913.2	14258.3	NM_080077		CG6806-RA	Lsp2	fly|CG6806-RA|ref|NM_080077|dgc|LP03332|gb|AY119005	Larval serum protein 2 precursor (LSP-2) (Hexamerin 2). [Source:Uniprot/SWISSPROT;Acc:Q24388] [CG6806-RA]	Larval serum protein 2	Larval serum protein 2 CG6806-PA [Drosophila melanogaster]	414841; 415089; 417715; 1582561; 1696317; 1708721; 1932070; 2227091; 2500286; 3130292; 3453783; 6184227; 6199241; 6264475; 6804227; 6804873; 6818315; 7713430; 8253272; 8544820; 8630534; 8969834; 9013251; 9128741; 9128742; 9654102; 10231363; 11404335; 12032070; 12196399; 12466195; 12548287; 14680800; 14707262; 15094375; 15545626	Dmel_CG6806	GO:6508(proteolysis); GO:6810(transport)	GO:4182(carboxypeptidase A activity); GO:45735(nutrient reservoir activity); GO:5344(oxygen transporter activity)	GO:5576(extracellular region); GO:5616(larval serum protein complex)	NM_080077	Dm.19654	45326
A_09_P013361	1.56987	0.023902	P	16707	10401.9	NM_079774		CG4986-RA	Mst57Dc	fly|CG4986-RA|ref|NM_079774|gb|AF142325|gb|DQ231598	Accessory gland-specific peptide 57Dc precursor (Male accessory gland secretory protein 57Dc) (45-kDa cAMP-dependent phosphoprotein) (Pp45). [Source:Uniprot/SWISSPROT;Acc:Q9V3J3] [CG4986-RA]	Male-specific RNA 57Dc	Male-specific RNA 57Dc CG4986-PA [Drosophila melanogaster]	2835228; 7711745; 9090115; 10451922; 11095759; 11116097; 12417656; 15266379; 15944345	Dmel_CG4986	GO:18991(oviposition); GO:45297(post-mating behavior)	GO:3674(molecular_function)	GO:5576(extracellular region)	NM_079774	Dm.1336	43121
A_09_P112880	0.642544	0.0136753	P	939.598	1462.53	BT023380		BT023380	Obp56h	gb|BT023380|gb|BT029395|tc|TC215616	Drosophila melanogaster IP01908 full insert cDNA. [BT023380]	Odorant-binding protein 56h	Odorant-binding protein 56h CG13874-PA [Drosophila melanogaster]	11238251; 11729153; 11914382; 12119098; 12213773	Dmel_CG13874	GO:42048(olfactory behavior); GO:19236(response to pheromone); GO:7606(sensory perception of chemical stimulus); GO:7608(sensory perception of smell); GO:6810(transport)	GO:5549(odorant binding)	GO:5576(extracellular region)	NM_137604	Dm.26973	37271
A_09_P196570	2.1057	0.0225038	P	394.694	185.499	TC204884		TC204884	TC204884	tc|TC204884	PGPLB_DROME (Q8INK6) Peptidoglycan-recognition protein-LB precursor , partial (94%) [TC204884]
A_09_P109405	2.0678	0.00401066	P	1322.46	643.575	NM_079664		CG7596-RA	Sgs5	fly|CG7596-RA|ref|NM_079664|dgc|LP02306|gb|AY118986	Salivary glue protein Sgs-5 precursor. [Source:Uniprot/SWISSPROT;Acc:P07701] [CG7596-RA]	Salivary gland secretion 5	Salivary gland secretion 5 CG7596-PA [Drosophila melanogaster]	812097; 825230; 1631956; 1898764; 1936956; 3098981; 3110006; 3123322; 3142764; 6199239; 6200375; 6439875; 7789271; 7841458; 8253272; 8582609; 8593163; 9521911; 9545464; 10591654; 11040216; 12548287; 12852852; 14668373; 15544943; 16264191	Dmel_CG7596	GO:7594(puparial adhesion)	GO:5198(structural molecule activity)	GO:5576(extracellular region)	NM_079664	Dm.20635	42114
A_09_P030466	1.91585	0.00514508	P	5326.68	2784.18	NM_078971		CG7754-RA	iotaTry	fly|CG7754-RA|ref|NM_078971|dgc|RE72254|gb|AY113550	Trypsin iota precursor (EC 3.4.21.4). [Source:Uniprot/SWISSPROT;Acc:P52905] [CG7754-RA]	iotaTrypsin	iotaTrypsin CG7754-PA [Drosophila melanogaster]	10486967; 12361959; 12537572; 12568721; 15324670; 15944359	Dmel_CG7754	GO:6508(proteolysis)	GO:4295(trypsin activity)	GO:5576(extracellular region)	NM_078971	Dm.5695	36223
A_09_P043366	2.10975	0.0015389	P	3409.84	1643.87	NM_057276		CG4178-RA	Lsp1beta	fly|CG4178-RA|ref|NM_057276|dgc|GH19329|gb|BT024223	Larval serum protein 1 beta chain precursor (Hexamerin 1 beta). [Source:Uniprot/SWISSPROT;Acc:P11996] [CG4178-RA]	Larval serum protein 1 beta	Larval serum protein 1 beta CG4178-PA [Drosophila melanogaster]	410643; 415089; 575634; 1696317; 1703957; 1708721; 2166700; 2227091; 2500286; 3097321; 3097322; 6083546; 6184227; 6199241; 6264475; 6279873; 6781759; 6791899; 6804227; 6818315; 8253272; 9013251; 9128742; 9654102; 10231363; 11782446; 12032070; 12548287; 15454541	Dmel_CG4178	GO:6810(transport)	GO:45735(nutrient reservoir activity); GO:5344(oxygen transporter activity)	GO:5576(extracellular region); GO:5616(larval serum protein complex)	NM_057276	Dm.2250	33274
A_09_P033011	0.643704	0.0230787	P	96.1463	148.907	NM_001042957		CG18140-RA	Cht3	fly|CG18140-RA|ref|NM_001042957|dgc|LP04696|gb|AY119021	Probable chitinase 3 (EC 3.2.1.14). [Source:Uniprot/SWISSPROT;Acc:Q9W5U2] [CG18140-RA]	Chitinase 3	Chitinase 3 CG18140-PA [Drosophila melanogaster]		Dmel_CG18140	GO:7267(cell-cell signaling); GO:6036(cuticle chitin catabolic process); GO:7165(signal transduction)	GO:8061(chitin binding); GO:4568(chitinase activity); GO:16799(hydrolase activity, hydrolyzing N-glycosyl compounds)	GO:5576(extracellular region)	NM_001042957	Dm.14448	3355116	KEGG pathway: Aminosugars metabolism 00530
A_09_P044651	1.65721	0.0064826	P	802.531	456.508	NM_079664		CG7596-RA	Sgs5	fly|CG7596-RA|ref|NM_079664|dgc|LP02306|gb|AY118986	Salivary glue protein Sgs-5 precursor. [Source:Uniprot/SWISSPROT;Acc:P07701] [CG7596-RA]	Salivary gland secretion 5	Salivary gland secretion 5 CG7596-PA [Drosophila melanogaster]	812097; 825230; 1631956; 1898764; 1936956; 3098981; 3110006; 3123322; 3142764; 6199239; 6200375; 6439875; 7789271; 7841458; 8253272; 8582609; 8593163; 9521911; 9545464; 10591654; 11040216; 12548287; 12852852; 14668373; 15544943; 16264191	Dmel_CG7596	GO:7594(puparial adhesion)	GO:5198(structural molecule activity)	GO:5576(extracellular region)	NM_079664	Dm.20635	42114
A_09_P015181	1.92521	0.0276926	P	3865.26	2098.75	NM_168021		CG32282-RA	dro4	fly|CG32282-RA|ref|NM_168021|gb|AY338360|gb|AY351399	drosomycin-4 CG32282-PA [Source:RefSeq_peptide;Acc:NP_728862] [CG32282-RA]	drosomycin-4	drosomycin-4 CG32282-PA [Drosophila melanogaster]	16157672	Dmel_CG32282	GO:6952(defense response)	GO:3674(molecular_function)	GO:5576(extracellular region)	NM_168021	Dm.15765	317954
A_09_P025541	0.565891	0.00129126	P	1024.91	1817.86	NM_137604		CG13874-RA	Obp56h	fly|CG13874-RA|ref|NM_137604|gb|BT023380|gb|BT029395	General odorant-binding protein 56h precursor. [Source:Uniprot/SWISSPROT;Acc:Q9V8Y9] [CG13874-RA]	Odorant-binding protein 56h	Odorant-binding protein 56h CG13874-PA [Drosophila melanogaster]	11238251; 11729153; 11914382; 12119098; 12213773	Dmel_CG13874	GO:42048(olfactory behavior); GO:19236(response to pheromone); GO:7606(sensory perception of chemical stimulus); GO:7608(sensory perception of smell); GO:6810(transport)	GO:5549(odorant binding)	GO:5576(extracellular region)	NM_137604	Dm.26973	37271
A_09_P012176	0.574935	0.0112475	P	185.69	323.285	NM_080321		CG10788-RB	ng3	fly|CG10788-RB|ref|NM_080321|dgc|LP03924|gb|AY119010	Protein new-glue 3 precursor (NG-3). [Source:Uniprot/SWISSPROT;Acc:P40140] [CG10788-RB]	new glue 3	new glue 3 CG10788-PB [Drosophila melanogaster]	7734390; 8205385; 8510164; 8674807; 9843674; 11118881; 12548287; 12852852	Dmel_CG10788	GO:7594(puparial adhesion)	GO:5198(structural molecule activity)	GO:5576(extracellular region)	NM_080321	Dm.31067	31299
A_09_P047041	1.70757	0.00841437	P	9977.05	5833.72	NM_078970		CG12351-RA	deltaTry	fly|CG12351-RA|ref|NM_078970|gb|BT023945|tc|TC209941	Trypsin delta/gamma precursor (EC 3.4.21.4). [Source:Uniprot/SWISSPROT;Acc:P42276] [CG12351-RA]	deltaTrypsin	deltaTrypsin CG12351-PA [Drosophila melanogaster]	2414727; 10486967; 11606746; 12032070; 12537572	Dmel_CG12351	GO:6508(proteolysis)	GO:4295(trypsin activity)	GO:5576(extracellular region)	NM_078970	Dm.21711	48343
A_09_P031196	0.650672	0.0293405	P	16021.2	25126.9	NM_078599		CG18657-RA	NetA	fly|CG18657-RA|ref|NM_078599|dgc|RE11206|gb|U60316	Netrin-A precursor. [Source:Uniprot/SWISSPROT;Acc:Q24567] [CG18657-RA]	Netrin-A	Netrin-A CG18657-PA [Drosophila melanogaster]	16341212; 15950216; 8780645; 8780646; 8861904; 8945464; 9072174; 9604933; 9856456; 9895324; 9914246; 10068638; 10072365; 10203809; 10328928; 10399909; 10518986; 10648238; 10679444; 10908592; 10972274; 10972289; 11074287; 11719202; 11900973; 12505997; 12975318; 14568107; 15261673; 15331236; 15474165; 15501232; 15617679; 16085495	Dmel_CG18657	GO:7411(axon guidance); GO:16337(cell-cell adhesion); GO:7160(cell-matrix adhesion); GO:7398(ectoderm development); GO:8045(motor axon guidance); GO:7165(signal transduction); GO:19226(transmission of nerve impulse)	GO:5198(structural molecule activity)	GO:5576(extracellular region); GO:5578(proteinaceous extracellular matrix)	NM_078599	Dm.2915	32398
A_09_P061146	1.66737	0.0227791	P	2987.4	1810.1	NM_079828		CG15520-RA	capa	fly|CG15520-RA|ref|NM_079828|dgc|GH28004|gb|AJ291724	Cardio acceleratory peptide 2b precursor (Myotropin-CAP2b-like protein) [Contains: CAP-1 (Capa-1) (CAP2b-1); CAP-2 (Capa-2) (CAP2b- 2); CAP-3 (Capa-3) (CAP2b-3) (Myotropin) (Pyrokinin)]. [Source:Uniprot/SWISSPROT;Acc:Q9NIP6] [CG15520-RA]	capability	capability CG15520-PA [Drosophila melanogaster]	12459185; 11959669; 8594932; 9277574; 10470487; 10628988; 11044659; 11179818; 11381038; 11551995; 11733057; 11735047; 11897378; 12163486; 12171930; 12177421; 12470668; 12586820; 12646179; 12804582; 12951076; 14729156; 15218025; 15695363	Dmel_CG15520	GO:6812(cation transport); GO:42045(epithelial fluid transport); GO:7218(neuropeptide signaling pathway); GO:8016(regulation of heart contraction)	GO:8613(diuretic hormone activity); GO:16084(myostimulatory hormone activity); GO:5184(neuropeptide hormone activity); GO:5102(receptor binding)	GO:5576(extracellular region)	NM_079828	Dm.2221	43541
A_09_P208395	0.578372	0.00624138	P	194.832	346.762	BT029930		BT029930	CG7166	gb|BT029930	Drosophila melanogaster IP11255 full insert cDNA. [BT029930]	CG7166	IP11255p		FLYBASE:FBgn0037107; GI:124248368					Dm.22867
A_09_P064286	1.62124	0.00756837	P	8716.75	5271.55	NM_079022		CG18372-RA	AttB	fly|CG18372-RA|ref|NM_079022|dgc|GH04030|gb|BT011154	Attacin-B precursor. [Source:Uniprot/SWISSPROT;Acc:Q9V751] [CG18372-RA]	Attacin-B	Attacin-B CG18372-PA [Drosophila melanogaster]	10767526; 10878576; 10963608; 11017107; 11118328; 11283698; 11606542; 11606746; 11703941; 11733057; 11742098; 11912488; 11912489; 12007414; 12032070; 12359879; 12431377; 12496260; 15032585; 15037551; 15199954; 15199956; 15324670; 15514678	Dmel_CG18372	GO:6952(defense response); GO:42742(defense response to bacterium)		GO:5576(extracellular region)	NM_079022	Dm.30918	36637
A_09_P146310	2.49646	0.00234708	P	10110.7	4150.71	TC219179		TC219179	TC219179	tc|TC219179	Q7KT85_DROME (Q7KT85) CG31775-PA (RH25462p) (RE38252p), partial (97%) [TC219179]
A_09_P201465	1.55887	0.00786623	P	2521.82	1630.18	NM_136913		CG17739-RA	CG17739	fly|CG17739-RA|ref|NM_136913|dgc|GH02025|gb|AY058267	CG17739-PA [Source:RefSeq_peptide;Acc:NP_610757] [CG17739-RA]	CG17739	CG17739-PA [Drosophila melanogaster]	14963491	Dmel_CG17739	GO:7155(cell adhesion); GO:7010(cytoskeleton organization and biogenesis); GO:7398(ectoderm development)	GO:4867(serine-type endopeptidase inhibitor activity); GO:5198(structural molecule activity)	GO:5576(extracellular region)	NM_136913	Dm.4212	36333
A_09_P046066	1.54891	0.0106831	P	4519.81	2841.41	NM_143252		CG6378-RA	BM-40-SPARC	fly|CG6378-RA|ref|NM_143252|dgc|RH45818|gb|AJ133736	BM-40-SPARC CG6378-PA [Source:RefSeq_peptide;Acc:NP_651509] [CG6378-RA]	BM-40-SPARC	BM-40-SPARC CG6378-PA [Drosophila melanogaster]	11976950; 10908592; 11486054; 12091301; 12505997	Dmel_CG6378	GO:7155(cell adhesion); GO:8283(cell proliferation); GO:7267(cell-cell signaling); GO:7398(ectoderm development); GO:7498(mesoderm development); GO:7399(nervous system development); GO:7165(signal transduction)	GO:5509(calcium ion binding); GO:8083(growth factor activity); GO:5198(structural molecule activity)	GO:5604(basement membrane); GO:5578(proteinaceous extracellular matrix)	NM_143252	Dm.1347	43230
A_09_P011321	1.61387	0.00668822	P	25515.9	16046.9	NM_001014516		CG17870-RI	14-3-3zeta	fly|CG17870-RI|fly|CG17870-RA|fly|CG17870-RJ|ref|NM_001014516	14-3-3-like protein (Leonardo protein) (14-3-3 zeta). [Source:Uniprot/SWISSPROT;Acc:P29310] [CG17870-RI]	14-3-3zeta	14-3-3zeta CG17870-PB, isoform B [Drosophila melanogaster]	16943323; 12529354; 1311096; 1349290; 2105491; 2484341; 6185380; 6818066; 7929140; 8482549; 8938125; 9120439; 9159394; 9159395; 9224723; 9246449; 9292728; 9342356; 9374412; 9423347; 9431804; 9461212; 9530502; 9568400; 9635185; 9927462; 10089881; 10230800; 10470487; 10471706; 10494038; 10771085; 10908583; 11014822; 11240291; 11430799; 11462211; 11606630; 11682604; 11715043; 11718926; 11810242; 118…	Dmel_CG17870	GO:7265(Ras protein signal transduction); GO:8283(cell proliferation); GO:7059(chromosome segregation); GO:7611(learning and/or memory); GO:45448(mitotic cell cycle, embryonic); GO:8355(olfactory learning); GO:48129(oocyte microtubule cytoskeleton polarization (sensu Insecta)); GO:74(regulation of progression through cell cycle); GO:6588(tryptophan hydroxylase activation)	GO:4863(diacylglycerol-activated phospholipid-dependent protein kinase C inhibitor activity); GO:5515(protein binding); GO:19904(protein domain specific binding); GO:8426(protein kinase C inhibitor activity); GO:30528(transcription regulator activity); GO:16483(tryptophan hydroxylase activator activity)	GO:45172(germline ring canal); GO:5634(nucleus)	NM_165742	Dm.4705	36059
A_09_P045881	3.11514	0.00724298	P	425.153	133.907	NM_079347		CG32146-RB	DLP	fly|CG32146-RB|fly|CG32146-RA|ref|NM_206353|ref|NM_079347	dally-like CG32146-PB, isoform B [Source:RefSeq_peptide;Acc:NP_996075] [CG32146-RB]	dally-like	dally-like CG32146-PB, isoform B [Drosophila melanogaster]	15886101; 15647318; 15469840; 15469839; 15479640; 14602684; 12663920; 10783877; 10931855; 10978892; 11091094; 11092814; 11533660; 11849963; 12015973; 12068947; 12417410; 12417413; 12417656; 12431369; 12612640; 12802016; 14616070; 14729575; 14757636; 15043815; 15148297; 15205520; 15647319; 15694333; 15834138; 15972463; 16291792; 16354714; 16364628	Dmel_CG32146	GO:16055(Wnt receptor signaling pathway); GO:7411(axon guidance); GO:7155(cell adhesion); GO:48749(compound eye development); GO:8101(decapentaplegic receptor signaling pathway); GO:50908(detection of light stimulus during visual perception); GO:8587(imaginal disc-derived wing margin morphogenesis); GO:45880(positive regulation of smoothened signaling pathway); GO:7367(segment polarity determinat…	GO:5515(protein binding); GO:5198(structural molecule activity)	GO:5576(extracellular region); GO:5578(proteinaceous extracellular matrix)	NM_206353	Dm.2840	39596
A_09_P013036	0.558243	0.00677145	P	1498.33	2725.2	NM_057642		CG1176-RB	Pbprp4	fly|CG1176-RB|fly|CG1176-RA|ref|NM_057642|gb|U05984	The gene Pheromone-binding protein-related protein 4 is referred to in FlyBase by the symbol Pbprp4 (CG1176, FBgn0011282). It has the cytological map location 84D3. Its sequence location is 3R:3076531..3077679. Its molecular function is described as:...	Pheromone-binding protein-related protein 4	Pheromone-binding protein-related protein 4 CG1176-PA [Drosophila melanogaster]	7545907; 10805087; 11729153; 12119098; 12213773; 12958599	Dmel_CG1176	GO:6810(transport)	GO:8145(phenylalkylamine binding); GO:5550(pheromone binding)	GO:5576(extracellular region)	NM_057642	Dm.2813	40874
A_09_P010736	1.92303	0.00439458	P	16365.4	8525.02	NM_206501		CG3477-RA	Pxd	fly|CG3477-RA|ref|NM_206501|gb|AY541497|tc|TC199277	Peroxidase precursor (EC 1.11.1.7) (DmPO). [Source:Uniprot/SWISSPROT;Acc:Q01603] [CG3477-RA]	Peroxidase	Peroxidase CG3477-PA [Drosophila melanogaster]	15979004; 1482687; 9545464; 11157786	Dmel_CG3477	GO:7306(insect chorion formation); GO:6979(response to oxidative stress)	GO:20037(heme binding); GO:5506(iron ion binding); GO:4601(peroxidase activity)	GO:42600(chorion); GO:5576(extracellular region)	NM_206501	Dm.31257	2768671	KEGG pathway: Coumarine and phenylpropanoid biosynthesis 00940; KEGG pathway: Methane metabolism 00680; KEGG pathway: Phenylalanine metabolism 00360
A_09_P178010	1.96342	0.00474818	P	3937.08	2020.13	NM_165744		CG17870-RF	14-3-3zeta	fly|CG17870-RF|ref|NM_165744|dgc|RH61958|gb|BT001855	14-3-3-like protein (Leonardo protein) (14-3-3 zeta). [Source:Uniprot/SWISSPROT;Acc:P29310] [CG17870-RF]	14-3-3zeta	14-3-3zeta CG17870-PB, isoform B [Drosophila melanogaster]	16943323; 12529354; 1311096; 1349290; 2105491; 2484341; 6185380; 6818066; 7929140; 8482549; 8938125; 9120439; 9159394; 9159395; 9224723; 9246449; 9292728; 9342356; 9374412; 9423347; 9431804; 9461212; 9530502; 9568400; 9635185; 9927462; 10089881; 10230800; 10470487; 10471706; 10494038; 10771085; 10908583; 11014822; 11240291; 11430799; 11462211; 11606630; 11682604; 11715043; 11718926; 11810242; 118…	Dmel_CG17870	GO:7265(Ras protein signal transduction); GO:8283(cell proliferation); GO:7059(chromosome segregation); GO:7611(learning and/or memory); GO:45448(mitotic cell cycle, embryonic); GO:8355(olfactory learning); GO:48129(oocyte microtubule cytoskeleton polarization (sensu Insecta)); GO:74(regulation of progression through cell cycle); GO:6588(tryptophan hydroxylase activation)	GO:4863(diacylglycerol-activated phospholipid-dependent protein kinase C inhibitor activity); GO:5515(protein binding); GO:19904(protein domain specific binding); GO:8426(protein kinase C inhibitor activity); GO:30528(transcription regulator activity); GO:16483(tryptophan hydroxylase activator activity)	GO:45172(germline ring canal); GO:5634(nucleus)	NM_165742	Dm.4705	36059
A_09_P223840	1.89965	0.00536772	P	3461.66	1830.75	NM_058156		CG9280-RA	Glt	fly|CG9280-RA|fly|CG9280-RC|fly|CG9280-RB|ref|NM_058156	Glutactin precursor. [Source:Uniprot/SWISSPROT;Acc:P33438] [CG9280-RA]	Glutactin	Glutactin CG9280-PC, isoform C [Drosophila melanogaster]	2108864; 2120047; 2557060; 7760738; 7821224; 8890157; 10628989; 10864456; 10931879; 11900973; 12417656; 14630943; 15525669	Dmel_CG9280		GO:5509(calcium ion binding); GO:3824(catalytic activity)	GO:5604(basement membrane)	NM_164832	Dm.14600	34193
A_09_P078611	1.82861	0.030304	P	10853.4	5767.08	NM_078546		CG1780-RB	Idgf4	fly|CG1780-RB|fly|CG1780-RA|ref|NM_167207|ref|NM_078546	Chitinase-like protein Idgf4 precursor (Imaginal disk growth factor protein 4). [Source:Uniprot/SWISSPROT;Acc:Q9W303] [CG1780-RB]	Imaginal disc growth factor 4	Imaginal disc growth factor 4 CG1780-PB, isoform B [Drosophila melanogaster]	9847235; 12242232; 12417656; 12505997; 14602076; 15466469; 15546623	Dmel_CG1780	GO:5975(carbohydrate metabolic process); GO:7267(cell-cell signaling); GO:6032(chitin catabolic process); GO:7444(imaginal disc development); GO:7165(signal transduction)	GO:4568(chitinase activity); GO:4553(hydrolase activity, hydrolyzing O-glycosyl compounds); GO:8084(imaginal disc growth factor activity)	GO:5576(extracellular region)	NM_167207	Dm.7207	31926	KEGG pathway: Aminosugars metabolism 00530
A_09_P012311	1.60023	0.0116934	P	17907.3	11377.7	NM_080165		CG18211-RA	betaTry	fly|CG18211-RA|ref|NM_080165|gb|BT016077|tc|TC206782	Trypsin beta precursor (EC 3.4.21.4). [Source:Uniprot/SWISSPROT;Acc:P35004] [CG18211-RA]	betaTrypsin	betaTrypsin CG18211-PA [Drosophila melanogaster]	2414727; 10486967; 12537572; 12568721; 15200955; 15324670; 16496002	Dmel_CG18211	GO:6508(proteolysis)	GO:4295(trypsin activity)	GO:5576(extracellular region)	NM_080165	Dm.11279	47901

## Sheet: 5794
Probe ID	Cont vs. 0.2 Gy	t-test P-value	Flags	Raw	Control	Genbank	Gene Symbol	Name_1	GeneName_1	TopHit_1	Description_1	Description	Product	PubMedID	DBid	GO biological process	GO molecular function	GO cellular component	RefSeq	UniGene	Entrez Gene ID	Pathways	Function
A_09_P014851	1.5485	0.000698	P	6356.31	4098.91	NM_140751		CG32190-RA	NUCB1	fly|CG32190-RA|ref|NM_140751|gb|AF011354|gb|AF044203	NUCB1 CG32190-PA [Source:RefSeq_peptide;Acc:NP_649008] [CG32190-RA]	NUCB1	NUCB1 CG32190-PA [Drosophila melanogaster]	10334852; 10446275; 11035778	Dmel_CG32190		GO:3677(DNA binding); GO:5509(calcium ion binding)	GO:5794(Golgi apparatus)	NM_140751	Dm.3072	39978
A_09_P206310	1.82313	0.00646273	P	780.162	429.906	NM_134310		CG5771-RB	Rab11	fly|CG5771-RB|fly|CG5771-RA|ref|NM_057822|ref|NM_134310	Rab-protein 11 CG5771-PA, isoform A [Source:RefSeq_peptide;Acc:NP_599137] [CG5771-RB]	Rab-protein 11	Rab-protein 11 CG5771-PA, isoform A [Drosophila melanogaster]	17079274; 16172984; 16155582; 16137928; 15897260; 2122228; 8978055; 9074639; 9197407; 9335599; 10471706; 10835395; 11448623; 11454766; 11697911; 11807042; 12431369; 12446149; 12612640; 12695332; 14530382; 14579253; 14588240; 14645371; 15055200; 15261673; 15620650; 15728675; 15965261; 16163390; 16354714	Dmel_CG5771	GO:31532(actin cytoskeleton reorganization); GO:19730(antimicrobial humoral response); GO:6897(endocytosis); GO:6886(intracellular protein transport); GO:8103(oocyte microtubule cytoskeleton polarization); GO:9993(oogenesis (sensu Insecta)); GO:6898(receptor-mediated endocytosis); GO:7317(regulation of pole plasm oskar mRNA localization); GO:6355(regulation of transcription, DNA-dependent); GO:42…	GO:5524(ATP binding); GO:5525(GTP binding); GO:3924(GTPase activity); GO:8134(transcription factor binding)	GO:5622(intracellular); GO:30140(trans-Golgi network transport vesicle)	NM_134310	Dm.3038	42501
A_09_P116640	0.646745	0.0143017	P	653.302	1017.27	NM_057470		CG9191-RA	Klp61F	fly|CG9191-RA|ref|NM_057470|dgc|LD15641|gb|AY069442	Bipolar kinesin KRP-130 (Kinesin-like protein Klp61F). [Source:Uniprot/SWISSPROT;Acc:P46863] [CG9191-RA]	Kinesin-like protein at 61F	Kinesin-like protein at 61F CG9191-PA [Drosophila melanogaster]	15367580; 1924306; 7787059; 7983154; 8083185; 8227131; 8538794; 8589456; 8918872; 9067597; 9268050; 9484596; 9584098; 9585508; 9718363; 9751878; 9869630; 9885249; 10073938; 10231358; 10471706; 10523496; 10559864; 10580983; 10637305; 10779909; 11034894; 11470815; 11739796; 12586708; 12975346; 13679514; 14527345; 15066637; 15182695; 15501232; 15522967; 15927177; 15998724; 16303556; 16452979	Dmel_CG9191	GO:7030(Golgi organization and biogenesis); GO:7049(cell cycle); GO:51299(centrosome separation); GO:7018(microtubule-based movement); GO:7100(mitotic centrosome separation); GO:7052(mitotic spindle organization and biogenesis); GO:6605(protein targeting)	GO:5524(ATP binding); GO:3777(microtubule motor activity); GO:3774(motor activity); GO:8574(plus-end-directed microtubule motor activity); GO:5200(structural constituent of cytoskeleton)	GO:5794(Golgi apparatus); GO:5737(cytoplasm); GO:5783(endoplasmic reticulum); GO:5871(kinesin complex); GO:5875(microtubule associated complex); GO:5873(plus-end kinesin complex); GO:5819(spindle)	NM_057470	Dm.804	38135
A_09_P146945	1.62249	0.0253833	P	1669.61	1075.45	NM_137785		CG9308-RA	CG9308	fly|CG9308-RA|ref|NM_137785|tc|TC207152	CG9308-PA [Source:RefSeq_peptide;Acc:NP_611629] [CG9308-RA]	CG9308	CG9308-PA [Drosophila melanogaster]	12750330; 15145531	Dmel_CG9308	GO:6886(intracellular protein transport); GO:16050(vesicle organization and biogenesis)		GO:30142(Golgi to ER transport vesicle); GO:16021(integral to membrane)	NM_137785	Dm.15691	37507
A_09_P046466	1.55496	0.0138359	P	1182.68	765.253	NM_135062		CG31651-RA	pgant5	fly|CG31651-RA|fly|CG31651-RB|ref|NM_001042873|ref|NM_135062	Polypeptide N-acetylgalactosaminyltransferase 5 (EC 2.4.1.41) (Protein-UDP acetylgalactosaminyltransferase 5) (UDP- GalNAc:polypeptide N-acetylgalactosaminyltransferase 5) (pp-GaNTase 5). [Source:Uniprot/SWISSPROT;Acc:Q6WV17] [CG31651-RA]	polypeptide GalNAc transferase 5	polypeptide GalNAc transferase 5 CG31651-PB, isoform B [Drosophila melanogaster]	11925450; 14691535	Dmel_CG31651	GO:9312(oligosaccharide biosynthetic process); GO:5976(polysaccharide metabolic process); GO:6486(protein amino acid glycosylation)	GO:4653(polypeptide N-acetylgalactosaminyltransferase activity)	GO:5795(Golgi stack)	NM_001042873	Dm.4033	326151	KEGG pathway: Glycan structures - biosynthesis 1 01030
A_09_P016821	1.83541	0.00454458	P	3611.75	1989.85	NM_176440		CG33105-RA	p24-2	fly|CG33105-RA|ref|NM_176440	CG33105-PA [Source:RefSeq_peptide;Acc:NP_788617] [CG33105-RA]	p24-related-2	p24-related-2 CG33105-PA [Drosophila melanogaster]	15145531; 15901661	Dmel_CG33105	GO:6886(intracellular protein transport)		GO:5794(Golgi apparatus); GO:16021(integral to membrane)	NM_176440	Dm.21274	318890

## Sheet: 16021
Probe ID	Cont vs. 0.2 Gy	t-test P-value	Flags	Raw	Control	Genbank	Gene Symbol	Name_1	GeneName_1	TopHit_1	Description_1	Description	Product	PubMedID	DBid	GO biological process	GO molecular function	GO cellular component	RefSeq	UniGene	Entrez Gene ID	Pathways	Function
A_09_P024646	0.591604	0.0117792	P	1569.64	2654.28	NM_078920		CG12837-RA	Tsp42Er	fly|CG12837-RA|ref|NM_078920|gb|BT025888|ug|EL869710	Tetraspanin 42Er CG12837-PA [Source:RefSeq_peptide;Acc:NP_523644] [CG12837-RA]	Tetraspanin 42Er	Tetraspanin 42Er CG12837-PA [Drosophila melanogaster]	11122467; 12370414; 14519762; 16061818; 16129837	Dmel_CG12837	GO:7398(ectoderm development); GO:7399(nervous system development); GO:19226(transmission of nerve impulse)	GO:5057(receptor signaling protein activity)	GO:16021(integral to membrane)	NM_078920	Dm.25411	35629
A_09_P107160	0.61493	0.0107816	P	7393.84	11996.8	NM_079137		CG3533-RA	uzip	fly|CG3533-RA|ref|NM_079137|dgc|SD09738|gb|AY052139	Protein unzipped precursor (Protein zipper). [Source:Uniprot/SWISSPROT;Acc:P10379] [CG3533-RA]	unzipped	unzipped CG3533-PA [Drosophila melanogaster]	3402433; 8568878; 9247329; 11529271; 12586708	Dmel_CG3533	GO:7409(axonogenesis)		GO:16021(integral to membrane); GO:5886(plasma membrane)	NM_079137	Dm.3321	38002
A_09_P000351	1.59073	0.0375849	P	543.199	313.061	NM_001031899		CG33639-RA	CG33639	fly|CG33639-RA|ref|NM_001031899|gb|BT029088|tc|TC203234	CG33639-PA [Source:RefSeq_peptide;Acc:NP_001027070] [CG33639-RA]	CG33639	CG33639-PA [Drosophila melanogaster]	10908591; 11381038	Dmel_CG33639	GO:7186(G-protein coupled receptor protein signaling pathway)	GO:8188(neuropeptide receptor activity); GO:1584(rhodopsin-like receptor activity)	GO:16021(integral to membrane)	NM_001031899	Dm.28218	32803
A_09_P187395	2.22924	0.0201611	P	7919.1	3673.96	NM_138135		CG15860-RA	pain	fly|CG15860-RA|ref|NM_138135|dgc|RE03641|gb|AY268106	Transient receptor potential cation channel protein painless. [Source:Uniprot/SWISSPROT;Acc:Q9W0Y6] [CG15860-RA]	painless	painless CG15860-PA [Drosophila melanogaster]	17081265; 16647259; 14585595; 10798390; 10835395; 12705873; 12814565; 12815418; 12958599; 14624845; 15296748; 15681611; 15713838; 15731759	Dmel_CG15860	GO:6816(calcium ion transport); GO:50974(detection of mechanical stimulus during sensory perception); GO:9408(response to heat); GO:9612(response to mechanical stimulus); GO:19233(sensory perception of pain); GO:43052(thermotaxis)	GO:5262(calcium channel activity); GO:5216(ion channel activity)	GO:16021(integral to membrane)	NM_138135	Dm.14984	37985
A_09_P052991	0.656584	0.00981455	P	1057.95	1610.36	NM_176284		CG17795-RA	mthl2	fly|CG17795-RA|fly|CG17795-RB|ref|NM_139723|ref|NM_176284	Probable G-protein coupled receptor Mth-like 2 precursor (Protein methuselah-like 2). [Source:Uniprot/SWISSPROT;Acc:Q9VRN2] [CG17795-RA]	methuselah-like 2	methuselah-like 2 CG17795-PA, isoform A [Drosophila melanogaster]	10908591; 11274391; 15133470	Dmel_CG17795	GO:7186(G-protein coupled receptor protein signaling pathway); GO:8340(determination of adult life span); GO:6950(response to stress)	GO:4930(G-protein coupled receptor activity); GO:1584(rhodopsin-like receptor activity)	GO:16021(integral to membrane)	NM_139723	Dm.12868	38636
A_09_P145020	2.44759	0.00244267	P	26474	10784.4	TC216768		TC216768	TC216768	tc|TC216768	Q9VIA4_DROME (Q9VIA4) CG1149-PA, complete [TC216768]
A_09_P013421	0.661598	0.0173953	P	3072.15	4638.62	NM_164842		CG9552-RA	rost	fly|CG9552-RA|ref|NM_164842|dgc|LD22863|gb|AF006955	Protein rolling stone. [Source:Uniprot/SWISSPROT;Acc:O44252] [CG9552-RA]	rolling stone	rolling stone CG9552-PA [Drosophila melanogaster]	7615665; 7671823; 7860706; 8805325; 8817453; 8905296; 9087441; 9230076; 10199975; 10218153; 10507836; 10943831; 11352947; 11719206; 12111720; 14550529	Dmel_CG9552	GO:7498(mesoderm development); GO:7520(myoblast fusion); GO:7519(striated muscle development)		GO:16021(integral to membrane); GO:16020(membrane); GO:5886(plasma membrane)	NM_164842	Dm.7302	34222
A_09_P065031	0.564883	3.71e-05	P	8706.7	15593.1	NM_078766		CG9159-RA	Kr-h2	fly|CG9159-RA|ref|NM_078766|dgc|AT13922|gb|AY118281	Protein Kr-h2. [Source:Uniprot/SWISSPROT;Acc:Q9V447] [CG9159-RA]	Kruppel homolog 2	Kruppel homolog 2 CG9159-PA [Drosophila melanogaster]	11752406; 16118195	Dmel_CG9159			GO:16021(integral to membrane)	NM_078766	Dm.323	33859
A_09_P198705	1.73137	0.0070451	P	4981.76	2834.01	NM_057353		CG9668-RA	Rh4	fly|CG9668-RA|ref|NM_057353|dgc|RH33063|gb|AY113582	Opsin Rh4 (Inner R7 photoreceptor cells opsin). [Source:Uniprot/SWISSPROT;Acc:P08255] [CG9668-RA]	Rhodopsin 4	Rhodopsin 4 CG9668-PA [Drosophila melanogaster]	1398053; 1403087; 1422119; 1726765; 1913822; 1946441; 2105166; 2105491; 2140105; 2163342; 2437266; 2484341; 2952772; 2968518; 7946332; 8005445; 8006992; 8338666; 8901571; 9016446; 9165115; 9275222; 9342399; 9502802; 9679151; 9895309; 10322485; 10368435; 10441750; 10449334; 10508742; 10594055; 10611962; 10908591; 11139510; 11222137; 11231067; 11316611; 11483574; 11519072; 11528479; 11557987; 12136…	Dmel_CG9668	GO:7186(G-protein coupled receptor protein signaling pathway); GO:9589(detection of UV); GO:7602(phototransduction); GO:7604(phototransduction, UV); GO:7601(visual perception)	GO:8020(G-protein coupled photoreceptor activity); GO:4930(G-protein coupled receptor activity)	GO:16021(integral to membrane)	NM_057353	Dm.4810	39887
A_09_P204510	1.56946	0.0138422	P,M	694.172	437.425	NM_057551		CG13521-RB	robo	fly|CG13521-RB|fly|CG13521-RA|ref|NM_166543|ref|NM_057551	roundabout CG13521-PB, isoform B [Source:RefSeq_peptide;Acc:NP_726224] [CG13521-RB]	roundabout	roundabout CG13521-PA, isoform A [Drosophila melanogaster]	16888037; 16360689; 15716500; 16341212; 15525663; 15147761; 15056612; 14651924; 12592406; 12397103; 12361590; 7646885; 8087543; 8173326; 8461134; 9443908; 9454347; 9458045; 9459439; 9875845; 9895324; 10102267; 10102268; 10203809; 10206637; 10218152; 10226006; 10230784; 10328928; 10375520; 10395576; 10399909; 10399919; 10479692; 10518986; 10518987; 10521399; 10591202; 10648238; 10679444; 10751187;…	Dmel_CG13521	GO:7411(axon guidance); GO:16199(axon midline choice point recognition); GO:7155(cell adhesion); GO:6952(defense response); GO:48813(dendrite morphogenesis); GO:7398(ectoderm development); GO:35050(embryonic heart tube development); GO:7427(epithelial cell migration, open tracheal system); GO:8038(neuron recognition); GO:7432(salivary gland boundary specification)	GO:4872(receptor activity); GO:4888(transmembrane receptor activity)	GO:5768(endosome); GO:5887(integral to plasma membrane); GO:5886(plasma membrane)	NM_057551	Dm.7485	37603
A_09_P015396	0.63394	0.000203	P	6663.69	10540.9	NM_168212		CG32380-RA	SMSr	fly|CG32380-RA|fly|CG32380-RB|ref|NM_139857|ref|NM_168212	Sphingomyelin synthase-related 1. [Source:Uniprot/SWISSPROT;Acc:Q9VS60] [CG32380-RA]	SMSr	SMSr CG32380-PA, isoform A [Drosophila melanogaster]	14685263; 15956666	Dmel_CG32380	GO:6686(sphingomyelin biosynthetic process)	GO:3674(molecular_function)	GO:16021(integral to membrane)	NM_139857	Dm.874	38823
A_09_P182680	1.70981	0.00833516	P	3973.39	2329.05	NM_078907		CG10106-RA	Tsp42Ee	fly|CG10106-RA|ref|NM_078907|dgc|RE12209|gb|AY075454	Tetraspanin 42Ee CG10106-PA [Source:RefSeq_peptide;Acc:NP_523631] [CG10106-RA]	Tetraspanin 42Ee	Tetraspanin 42Ee CG10106-PA [Drosophila melanogaster]	11122467; 12370414; 14519762; 15501232; 16129837	Dmel_CG10106			GO:16021(integral to membrane)	NM_078907	Dm.500	35614
A_09_P218645	1.856	0.0186373	P	3483.35	1927.48	BT015303		BT015303	NepYr	gb|BT015303	Drosophila melanogaster AT16733 full insert cDNA. [BT015303]	Neuropeptide Y receptor-like	AT16733p		GI:51092236					Dm.2344
A_09_P070466	0.571756	0.0003	P	142.059	248.747	NM_079731		CG17241-RA	Or94a	fly|CG17241-RA|ref|NM_079731|tc|TC204478	Putative odorant receptor 94a. [Source:Uniprot/SWISSPROT;Acc:Q9VCS9] [CG17241-RA]	Odorant receptor 94a	Odorant receptor 94a CG17241-PA [Drosophila melanogaster]	10943835; 10943836; 11257221; 11914382; 12782114; 14608037; 16139208; 16332533	Dmel_CG17241	GO:7186(G-protein coupled receptor protein signaling pathway); GO:7267(cell-cell signaling); GO:7608(sensory perception of smell)	GO:5549(odorant binding); GO:4984(olfactory receptor activity)	GO:16021(integral to membrane)	NM_079731	Dm.27602	42711
A_09_P166110	1.93582	0.00399437	P	15138.9	7793.46	NM_057693		CG4799-RA	Pen	fly|CG4799-RA|ref|NM_057693|dgc|LD24935|dgc|LP03126	Importin alpha subunit (Karyopherin alpha subunit) (Pendulin). [Source:Uniprot/SWISSPROT;Acc:P52295] [CG4799-RA]	Pendulin	Pendulin CG4799-PA [Drosophila melanogaster]	12490175; 12435357; 7565597; 7749327; 7790349; 7790350; 8224829; 8417324; 8640222; 9391096; 9396726; 9406612; 9491068; 9540809; 10049924; 10471706; 10842307; 10882518; 11116097; 11429277; 11546751; 12019231; 12042820; 12042821; 12408870; 12626737; 12646868; 12655640; 14704178; 15001111; 15204079; 15922834	Dmel_CG4799	GO:6607(NLS-bearing substrate import into nucleus); GO:8283(cell proliferation); GO:16482(cytoplasmic transport); GO:7303(cytoplasmic transport, nurse cell to oocyte); GO:42332(gravitaxis); GO:48542(lymph gland development); GO:7301(ovarian ring canal formation); GO:6606(protein import into nucleus); GO:59(protein import into nucleus, docking); GO:7291(sperm individualization)	GO:8320(protein carrier activity)	GO:15629(actin cytoskeleton); GO:5737(cytoplasm); GO:5643(nuclear pore); GO:5634(nucleus)	NM_057693	Dm.3560	34338
A_09_P150520	0.577793	0.00601053	P	10309.4	18340.7	NM_057819		CG9258-RA	nrv1	fly|CG9258-RA|ref|NM_057819|gb|U22438|tc|TC211784	Sodium/potassium-transporting ATPase beta-1 chain (Sodium/potassium- dependent ATPase beta-1 subunit) (Protein nervana 1). [Source:Uniprot/SWISSPROT;Acc:Q24046] [CG9258-RA]	nervana 1	nervana 1 CG9258-PA [Drosophila melanogaster]	3320283; 6806816; 7540667; 7777518; 9648860; 9751137; 10452950; 10470487; 12695332; 12765609; 12782686; 12930776; 15131112; 15299033; 15501232; 15976174	Dmel_CG9258	GO:6813(potassium ion transport); GO:6814(sodium ion transport)	GO:16820(hydrolase activity, acting on acid anhydrides, catalyzing transmembrane movement of substances); GO:5391(sodium:potassium-exchanging ATPase activity)	GO:5886(plasma membrane); GO:5890(sodium:potassium-exchanging ATPase complex)	NM_057819	Dm.4821	33952
A_09_P029441	1.51685	0.0240017	P	19278.5	12332.1	NM_057693		CG4799-RA	Pen	fly|CG4799-RA|ref|NM_057693|dgc|LD24935|dgc|LP03126	Importin alpha subunit (Karyopherin alpha subunit) (Pendulin). [Source:Uniprot/SWISSPROT;Acc:P52295] [CG4799-RA]	Pendulin	Pendulin CG4799-PA [Drosophila melanogaster]	12490175; 12435357; 7565597; 7749327; 7790349; 7790350; 8224829; 8417324; 8640222; 9391096; 9396726; 9406612; 9491068; 9540809; 10049924; 10471706; 10842307; 10882518; 11116097; 11429277; 11546751; 12019231; 12042820; 12042821; 12408870; 12626737; 12646868; 12655640; 14704178; 15001111; 15204079; 15922834	Dmel_CG4799	GO:6607(NLS-bearing substrate import into nucleus); GO:8283(cell proliferation); GO:16482(cytoplasmic transport); GO:7303(cytoplasmic transport, nurse cell to oocyte); GO:42332(gravitaxis); GO:48542(lymph gland development); GO:7301(ovarian ring canal formation); GO:6606(protein import into nucleus); GO:59(protein import into nucleus, docking); GO:7291(sperm individualization)	GO:8320(protein carrier activity)	GO:15629(actin cytoskeleton); GO:5737(cytoplasm); GO:5643(nuclear pore); GO:5634(nucleus)	NM_057693	Dm.3560	34338
A_09_P064356	0.664394	0.0174954	P	96.1793	147.479	NM_168163		CG32401-RA	Or65a	fly|CG32401-RA|ref|NM_168163|tc|TC203882	Putative odorant receptor 65a. [Source:Uniprot/SWISSPROT;Acc:P82982] [CG32401-RA]	Odorant receptor 65a	Odorant receptor 65a CG32401-PA [Drosophila melanogaster]	10943835; 10943836; 11914382; 12782114; 14608037; 15210116; 16139208; 16139209	Dmel_CG32401	GO:7608(sensory perception of smell)	GO:5549(odorant binding); GO:4984(olfactory receptor activity)	GO:16021(integral to membrane)	NM_168163	Dm.26516	318011
A_09_P056906	0.42342	0.013846	P,A	28.3625	57.6894	NM_165205		CG31747-RA	Gr36a	fly|CG31747-RA|ref|NM_165205|tc|TC204410	Putative gustatory receptor 36a. [Source:Uniprot/SWISSPROT;Acc:P58955] [CG31747-RA]	Gustatory receptor 36a	Gustatory receptor 36a CG31747-PA [Drosophila melanogaster]	10710312; 11516643; 16139201	Dmel_CG31747	GO:50909(sensory perception of taste)	GO:8527(taste receptor activity)	GO:16021(integral to membrane)	NM_165205	Dm.26372	117488
A_09_P090675	1.67465	0.00857128	P	10711.1	6505.29	CG5670-RE		CG5670-RE	Atpalpha	fly|CG5670-RE|fly|CG5670-RB|fly|CG5670-RH|fly|CG5670-RC	Sodium/potassium-transporting ATPase alpha chain (EC 3.6.3.9) (Sodium pump) (Na+/K+ ATPase). [Source:Uniprot/SWISSPROT;Acc:P13607] [CG5670-RE]
A_09_P052341	1.6063	0.0175639	P	1796.19	1140.78	CG3725-RF		CG3725-RF	Ca-P60A	fly|CG3725-RF|fly|CG3725-RC|fly|CG3725-RB|fly|CG3725-RE	Calcium-transporting ATPase sarcoplasmic/endoplasmic reticulum type (EC 3.6.3.8) (Calcium pump). [Source:Uniprot/SWISSPROT;Acc:P22700] [CG3725-RF]
A_09_P032416	1.60253	0.0377803	P	5393.71	3396.54	NM_164818		CG13387-RA	emb	fly|CG13387-RA|ref|NM_164818|dgc|LD45706|dgc|GH01059	Exportin-1 (Chromosome region maintenance 1 protein) (Protein embargoed). [Source:Uniprot/SWISSPROT;Acc:Q9TVM2] [CG13387-RA]	embargoed	embargoed CG13387-PA [Drosophila melanogaster]	16027171; 14638854; 12538513; 9374400; 10471706; 10636888; 10924475; 11944946; 12743041; 14759367; 16496002	Dmel_CG13387	GO:7275(multicellular organismal development); GO:6611(protein export from nucleus); GO:59(protein import into nucleus, docking); GO:15031(protein transport)	GO:5049(nuclear export signal receptor activity); GO:5515(protein binding); GO:8565(protein transporter activity)	GO:5737(cytoplasm); GO:5643(nuclear pore)	NM_164818	Dm.3346	34167
A_09_P191745	2.0033	0.00440863	P	4711.97	2345.83	NM_057693		CG4799-RA	Pen	fly|CG4799-RA|ref|NM_057693|dgc|LD24935|dgc|LP03126	Importin alpha subunit (Karyopherin alpha subunit) (Pendulin). [Source:Uniprot/SWISSPROT;Acc:P52295] [CG4799-RA]	Pendulin	Pendulin CG4799-PA [Drosophila melanogaster]	12490175; 12435357; 7565597; 7749327; 7790349; 7790350; 8224829; 8417324; 8640222; 9391096; 9396726; 9406612; 9491068; 9540809; 10049924; 10471706; 10842307; 10882518; 11116097; 11429277; 11546751; 12019231; 12042820; 12042821; 12408870; 12626737; 12646868; 12655640; 14704178; 15001111; 15204079; 15922834	Dmel_CG4799	GO:6607(NLS-bearing substrate import into nucleus); GO:8283(cell proliferation); GO:16482(cytoplasmic transport); GO:7303(cytoplasmic transport, nurse cell to oocyte); GO:42332(gravitaxis); GO:48542(lymph gland development); GO:7301(ovarian ring canal formation); GO:6606(protein import into nucleus); GO:59(protein import into nucleus, docking); GO:7291(sperm individualization)	GO:8320(protein carrier activity)	GO:15629(actin cytoskeleton); GO:5737(cytoplasm); GO:5643(nuclear pore); GO:5634(nucleus)	NM_057693	Dm.3560	34338
A_09_P043876	1.53947	0.0146061	P	20890.3	13162.1	NM_079683		CG4550-RA	ninaE	fly|CG4550-RA|ref|NM_079683|dgc|RH01460|dgc|HL01686	Opsin Rh1 (Outer R1-R6 photoreceptor cells opsin) (Neither inactivation nor afterpotential E protein). [Source:Uniprot/SWISSPROT;Acc:P06002] [CG4550-RA]	neither inactivation nor afterpotential E	neither inactivation nor afterpotential E CG4550-PA [Drosophila melanogaster]	16756553; 15014127; 14769922; 1339673; 1398053; 1403087; 1422119; 1431838; 1534022; 1551579; 1608933; 1644830; 1689056; 1707759; 1726765; 1833511; 1838762; 1859395; 1913822; 1982113; 2010085; 2105166; 2105491; 2110249; 2117644; 2140105; 2163342; 2361011; 2437266; 2484341; 2521839; 2528612; 2580638; 2768273; 2953598; 2966681; 2968518; 2975615; 2985266; 3040524; 3097245; 3117994; 3930500; 6770840; …	Dmel_CG4550	GO:7186(G-protein coupled receptor protein signaling pathway); GO:8344(adult locomotory behavior); GO:8594(photoreceptor cell morphogenesis); GO:7602(phototransduction); GO:42052(rhabdomere development); GO:7601(visual perception)	GO:8020(G-protein coupled photoreceptor activity); GO:4930(G-protein coupled receptor activity)	GO:16023(cytoplasmic membrane-bound vesicle); GO:16027(inaD signaling complex); GO:16021(integral to membrane); GO:5771(multivesicular body); GO:16028(rhabdomere); GO:5791(rough endoplasmic reticulum); GO:5767(secondary lysosome); GO:16029(subrhabdomeral cisterna)	NM_079683	Dm.6744	42367
A_09_P224995	1.55986	0.0135169	P	2211.79	1410.5	NM_165694		CG18345-RB	trpl	fly|CG18345-RB|fly|CG18345-RA|fly|CG18345-RC|ref|NM_165694	Transient-receptor-potential-like protein. [Source:Uniprot/SWISSPROT;Acc:P48994] [CG18345-RB]	trp-like	trp-like CG18345-PA, isoform A [Drosophila melanogaster]	17190901; 16787936; 11931743; 1314616; 7516156; 7531160; 7680430; 7694408; 7695998; 7832780; 8570597; 8574574; 8621686; 8640222; 8646774; 8663982; 8670063; 8670154; 8794093; 8918461; 8939592; 8943075; 8986787; 9003779; 9010208; 9038807; 9215637; 9223679; 9230432; 9301336; 9351965; 9354808; 9363946; 9427248; 9494079; 9679151; 9681185; 9687357; 9687362; 9697865; 9813038; 9930700; 10070252; 10371201…	Dmel_CG18345	GO:6816(calcium ion transport); GO:19722(calcium-mediated signaling); GO:7589(fluid secretion); GO:9628(response to abiotic stimulus); GO:9416(response to light stimulus)	GO:5262(calcium channel activity); GO:5516(calmodulin binding); GO:5261(cation channel activity); GO:8086(light-activated voltage-gated calcium channel activity); GO:15279(store-operated calcium channel activity)	GO:5887(integral to plasma membrane); GO:5886(plasma membrane); GO:16028(rhabdomere)	NM_057547	Dm.546	36003
A_09_P020306	1.52427	0.0153917	P	4468.41	2958.89	NM_078777		CG4675-RB	Ndae1	fly|CG4675-RB|fly|CG4675-RA|ref|NM_164744|ref|NM_078777	Na+-driven anion exchanger 1 CG4675-PB, isoform B [Source:RefSeq_peptide;Acc:NP_723264] [CG4675-RB]	Na[+]-driven anion exchanger 1	Na[+]-driven anion exchanger 1 CG4675-PA, isoform A [Drosophila melanogaster]	9491068; 10827195; 11443044; 11529271; 14729156; 15020472; 15282158; 15944359; 16284119	Dmel_CG4675	GO:6820(anion transport); GO:15701(bicarbonate transport); GO:6821(chloride transport); GO:15992(proton transport); GO:6814(sodium ion transport)	GO:15380(anion exchanger activity); GO:15106(bicarbonate transporter activity); GO:8324(cation transporter activity); GO:5452(inorganic anion exchanger activity); GO:8510(sodium:bicarbonate symporter activity)	GO:16021(integral to membrane); GO:5886(plasma membrane)	NM_078777	Dm.7104	34005
A_09_P131005	0.598458	0.00940907	P	12545.1	21666.3	NM_078513		CG4626-RB	fz4	fly|CG4626-RB|fly|CG4626-RA|ref|NM_167119|ref|NM_078513	Protein frizzled-4 precursor (dFz4). [Source:Uniprot/SWISSPROT;Acc:Q9NBW1] [CG4626-RB]	frizzled 4	frizzled 4 CG4626-PB, isoform B [Drosophila melanogaster]	10507837; 10908591; 11335117; 11519072; 12205098	Dmel_CG4626	GO:7186(G-protein coupled receptor protein signaling pathway); GO:16055(Wnt receptor signaling pathway); GO:7267(cell-cell signaling); GO:7163(establishment and/or maintenance of cell polarity); GO:7165(signal transduction)	GO:4930(G-protein coupled receptor activity); GO:42813(Wnt receptor activity); GO:17147(Wnt-protein binding); GO:4926(non-G-protein coupled 7TM receptor activity); GO:4888(transmembrane receptor activity)	GO:16021(integral to membrane); GO:5886(plasma membrane)	NM_167119	Dm.92	31659
A_09_P194020	1.8579	0.0058171	P	4214.46	2293.61	CG8663-RD		CG8663-RD	nrv3	fly|CG8663-RD|fly|CG8663-RC|fly|CG8663-RA|fly|CG8663-RB	nervana 3 CG8663-PA, isoform A [Source:RefSeq_peptide;Acc:NP_610108] [CG8663-RD]
A_09_P044496	0.613145	0.00379329	P,A	74.2154	119.203	NM_080051		CG1214-RA	ru	fly|CG1214-RA|ref|NM_080051|dgc|LP02893|gb|AF318284	roughoid CG1214-PA [Source:RefSeq_peptide;Acc:NP_524790] [CG1214-RA]	roughoid	roughoid CG1214-PA [Drosophila melanogaster]	15229181; 575634; 2499514; 2511049; 2852141; 5722790; 6407004; 8077114; 8620860; 8759316; 8964464; 9435287; 9636184; 10837218; 10887159; 10934048; 11023685; 11454766; 11504926; 11880339; 11973283; 12123607; 12169630; 12181552; 12181568; 12221285; 12223409; 12408803; 12636917; 12655063; 12820957; 14507785; 14711872; 15084467; 15744048; 16123311	Dmel_CG1214	GO:7398(ectoderm development); GO:7173(epidermal growth factor receptor signaling pathway); GO:7427(epithelial cell migration, open tracheal system); GO:7292(female gamete generation); GO:7479(leg disc proximal/distal pattern formation); GO:7399(nervous system development)	GO:5102(receptor binding); GO:5057(receptor signaling protein activity); GO:8236(serine-type peptidase activity)	GO:16021(integral to membrane); GO:5887(integral to plasma membrane); GO:5886(plasma membrane)	NM_080051	Dm.1452	44856
A_09_P170060	1.55538	0.0136827	P	3999.01	2581.77	CG7816-RF		CG7816-RF	CG7816	fly|CG7816-RF|fly|CG7816-RC|fly|CG7816-RG|fly|CG7816-RE	Hypothetical protein CG7816. [Source:Uniprot/SWISSPROT;Acc:Q9VAF0] [CG7816-RF]
A_09_P183115	1.80985	0.00645795	P	15743.1	8708.81	CG8663-RD		CG8663-RD	nrv3	fly|CG8663-RD|fly|CG8663-RC|fly|CG8663-RA|fly|CG8663-RB	nervana 3 CG8663-PA, isoform A [Source:RefSeq_peptide;Acc:NP_610108] [CG8663-RD]
A_09_P188045	1.98194	0.0244134	P	2892.07	1451.92	CG1522-RE		CG1522-RE	cac	fly|CG1522-RE|fly|CG1522-RF|fly|CG1522-RI|fly|CG1522-RJ	Voltage-dependent calcium channel type A alpha-1 subunit (Cacophony protein) (Nightblind A protein) (No-on-transient B protein) (Dmca1A). [Source:Uniprot/SWISSPROT;Acc:P91645] [CG1522-RE]
A_09_P050461	1.87892	0.00556505	P	11048.9	6108.35	NM_001032052		CG33715-RE	Msp-300	fly|CG33715-RE|ref|NM_001032052|dgc|LP10936|gb|AY061561	Muscle-specific protein 300 CG33715-PE, isoform E [Source:RefSeq_peptide;Acc:NP_001027223] [CG33715-RE]	Muscle-specific protein 300	Muscle-specific protein 300 CG33715-PD, isoform D [Drosophila melanogaster]	16337624; 1289062; 7732594; 9013930; 9025063; 10908588; 11486054; 11742088; 11779831; 12351791; 12376554; 12408964; 12417656; 12736298; 12888516	Dmel_CG33715	GO:7049(cell cycle); GO:7059(chromosome segregation); GO:910(cytokinesis); GO:7010(cytoskeleton organization and biogenesis); GO:7498(mesoderm development); GO:7067(mitosis)	GO:3779(actin binding); GO:19237(centromeric DNA binding); GO:8092(cytoskeletal protein binding); GO:3725(double-stranded RNA binding); GO:3676(nucleic acid binding)	GO:15629(actin cytoskeleton); GO:8305(integrin complex)	NM_001032051	Dm.20325	3771968
A_09_P040356	1.55341	0.0373002	P	1336.82	864.386	NM_133125		CG7537-RB	inx5	fly|CG7537-RB|ref|NM_133125|gb|AY057372|gb|BT031084	Innexin inx5. [Source:Uniprot/SWISSPROT;Acc:Q9VWL5] [CG7537-RB]	inx5	inx5 CG7537-PB [Drosophila melanogaster]	11340620; 11960713; 11973283; 16139277	Dmel_CG7537	GO:7165(signal transduction)	GO:15286(innexin channel activity)	GO:5921(gap junction); GO:16021(integral to membrane)	NM_133125	Dm.5292	32901
A_09_P131350	0.637136	0.0130381	P	5592.02	8676.13	NM_080359		CG11822-RB	nAcRbeta-21C	fly|CG11822-RB|fly|CG11822-RA|ref|NM_164386|ref|NM_080359	nicotinic acetylcholine receptor beta 21C CG11822-PB, isoform B [Source:RefSeq_peptide;Acc:NP_722638] [CG11822-RB]	nicotinic acetylcholine receptor beta 21C	nicotinic acetylcholine receptor beta 21C CG11822-PB, isoform B [Drosophila melanogaster]	10798390; 11953451; 11973307; 12436418; 12486703; 12820891; 15716490; 15770687; 16077094	Dmel_CG11822	GO:6811(ion transport)	GO:30594(neurotransmitter receptor activity); GO:4889(nicotinic acetylcholine-activated cation-selective channel activity)	GO:5892(nicotinic acetylcholine-gated receptor-channel complex); GO:45211(postsynaptic membrane)	NM_164386	Dm.248	33228
A_09_P054641	0.512927	0.00146543	P,A	60.0079	123.748	NM_140133		CG14157-RA	Or67d	fly|CG14157-RA|ref|NM_140133|tc|TC204412	Putative odorant receptor 67d. [Source:Uniprot/SWISSPROT;Acc:Q9VT92] [CG14157-RA]	Or67d	Or67d CG14157-PA [Drosophila melanogaster]	17392786; 11914382; 12782114; 14608037; 16139208; 16139209	Dmel_CG14157	GO:7186(G-protein coupled receptor protein signaling pathway); GO:7608(sensory perception of smell)	GO:5549(odorant binding); GO:4984(olfactory receptor activity)	GO:16021(integral to membrane)	NM_140133	Dm.27107	39191
A_09_P194995	1.85695	0.00581421	P	11421.4	6099.59	CG8663-RD		CG8663-RD	nrv3	fly|CG8663-RD|fly|CG8663-RC|fly|CG8663-RA|fly|CG8663-RB	nervana 3 CG8663-PA, isoform A [Source:RefSeq_peptide;Acc:NP_610108] [CG8663-RD]
A_09_P077611	0.59679	0.000146	P	13418.9	22533.4	NM_130615		CG4313-RB	CG4313	fly|CG4313-RB|fly|CG4313-RA|ref|NM_001038735|ref|NM_130615	CG4313-PB, isoform B [Source:RefSeq_peptide;Acc:NP_001033824] [CG4313-RB]	CG4313	CG4313-PB, isoform B [Drosophila melanogaster]	10908591; 11337470; 11519072; 14691551	Dmel_CG4313	GO:7186(G-protein coupled receptor protein signaling pathway)	GO:4930(G-protein coupled receptor activity); GO:1584(rhodopsin-like receptor activity)	GO:16021(integral to membrane); GO:5886(plasma membrane)	NM_001038735	Dm.2215	31169
A_09_P013056	1.66598	0.0474964	P	4742.2	2844.47	CG10844-RA		CG10844-RA	Rya-r44F	fly|CG10844-RA|fly|CG10844-RC|fly|CG10844-RB|fly|CG10844-RD	Ryanodine receptor 44F. [Source:Uniprot/SWISSPROT;Acc:Q24498] [CG10844-RA]
A_09_P211305	1.85473	0.00588758	P	3423.81	1844.21	CG32547-RB		CG32547-RB	CG32547	fly|CG32547-RB|gb|AY240945	This gene is referred to in FlyBase by the symbol CG32547 (FBgn0052547). It has the cytological map location 17B1-17B3. Its sequence location is X:18337843..18356383. Its molecular function is described as neuropeptide receptor activity. It is...
A_09_P164390	1.50088	0.028185	P	2180.74	1457.41	NM_080192		CG10449-RA	Catsup	fly|CG10449-RA|ref|NM_080192|dgc|LD23513|gb|AF216584	Protein catecholamines up. [Source:Uniprot/SWISSPROT;Acc:Q9V3A4] [CG10449-RA]	Catecholamines up	Catecholamines up CG10449-PA [Drosophila melanogaster]	16682353; 826448; 1783295; 3007281; 6425116; 6790250; 7859742; 8176361; 8647399; 8683095; 9115734; 9892357; 10231582; 10471706; 10471719; 12702650; 15189334; 15454546; 15509557	Dmel_CG10449	GO:30001(metal ion transport); GO:7300(nurse cell to oocyte transport (sensu Insecta)); GO:42069(regulation of catecholamine metabolic process)	GO:46873(metal ion transporter activity)	GO:5887(integral to plasma membrane)	NM_080192	Dm.12530	48805
A_09_P198400	1.64015	0.0102723	P	2195.94	1339.9	NM_079105		CG4084-RA	l(2)not	fly|CG4084-RA|ref|NM_079105|dgc|SD03142|gb|BT024214	Lethal(2)neighbour of tid protein (NOT56) (NOT45). [Source:Uniprot/SWISSPROT;Acc:Q27333] [CG4084-RA]	lethal (2) neighbor of tid	lethal (2) neighbor of tid CG4084-PA [Drosophila melanogaster]	7758246; 8666267; 8809105; 9342399; 9373138; 10368435; 11782446; 12464307; 15020472	Dmel_CG4084		GO:30(mannosyltransferase activity)	GO:30176(integral to endoplasmic reticulum membrane)	NM_079105	Dm.2569	37754	KEGG pathway: Glycan structures - biosynthesis 1 01030; KEGG pathway: N-Glycan biosynthesis 00510
A_09_P195260	2.11081	0.00131174	P	16094.9	7572.97	NM_057693		CG4799-RA	Pen	fly|CG4799-RA|ref|NM_057693|dgc|LD24935|dgc|LP03126	Importin alpha subunit (Karyopherin alpha subunit) (Pendulin). [Source:Uniprot/SWISSPROT;Acc:P52295] [CG4799-RA]	Pendulin	Pendulin CG4799-PA [Drosophila melanogaster]	12490175; 12435357; 7565597; 7749327; 7790349; 7790350; 8224829; 8417324; 8640222; 9391096; 9396726; 9406612; 9491068; 9540809; 10049924; 10471706; 10842307; 10882518; 11116097; 11429277; 11546751; 12019231; 12042820; 12042821; 12408870; 12626737; 12646868; 12655640; 14704178; 15001111; 15204079; 15922834	Dmel_CG4799	GO:6607(NLS-bearing substrate import into nucleus); GO:8283(cell proliferation); GO:16482(cytoplasmic transport); GO:7303(cytoplasmic transport, nurse cell to oocyte); GO:42332(gravitaxis); GO:48542(lymph gland development); GO:7301(ovarian ring canal formation); GO:6606(protein import into nucleus); GO:59(protein import into nucleus, docking); GO:7291(sperm individualization)	GO:8320(protein carrier activity)	GO:15629(actin cytoskeleton); GO:5737(cytoplasm); GO:5643(nuclear pore); GO:5634(nucleus)	NM_057693	Dm.3560	34338
A_09_P056861	1.8205	0.00343512	P	807.473	446.537	NM_169314		CG31405-RA	Gr85a	fly|CG31405-RA|ref|NM_169314|tc|TC204280	Putative gustatory receptor 85a. [Source:Uniprot/SWISSPROT;Acc:Q8INM9] [CG31405-RA]	Gustatory receptor 85a	Gustatory receptor 85a CG31405-PA [Drosophila melanogaster]	11516643; 15377795; 16139201	Dmel_CG31405	GO:50909(sensory perception of taste)	GO:8527(taste receptor activity)	GO:16021(integral to membrane)	NM_169314	Dm.26363	117475
A_09_P056911	1.81274	0.00508407	P	938.552	526.762	NM_139357		CG13788-RA	Gr28b	fly|CG13788-RA|ref|NM_139357|tc|TC203276	Putative gustatory receptor 28b. [Source:Uniprot/SWISSPROT;Acc:Q9VM08] [CG13788-RA]	Gustatory receptor 28b	Gustatory receptor 28b CG13788-PA, isoform A [Drosophila melanogaster]	10710312; 11257221; 11301013; 11516643; 14608037; 15202999; 16139201	Dmel_CG13788	GO:50909(sensory perception of taste)	GO:8527(taste receptor activity)	GO:16021(integral to membrane)	NM_139357	Dm.26373	117496
A_09_P033431	0.608182	0.000296	P	15138.7	24443.4	NM_140590		CG5027-RA	CG5027	fly|CG5027-RA|ref|NM_140590|dgc|LD24073|gb|AY051696	CG5027-PA [Source:RefSeq_peptide;Acc:NP_648847] [CG5027-RA]	CG5027	CG5027-PA [Drosophila melanogaster]	12766950; 14963491	Dmel_CG5027		GO:5509(calcium ion binding); GO:9055(electron carrier activity); GO:3756(protein disulfide isomerase activity); GO:15035(protein disulfide oxidoreductase activity)	GO:16021(integral to membrane)	NM_140590	Dm.3366	39775
A_09_P064131	1.86501	0.00139662	P	875.287	475.615	NM_176570		CG33083-RA	Gr97a	fly|CG33083-RA|ref|NM_176570|tc|TC203785|tc|TC205736	Putative gustatory receptor 97a. [Source:Uniprot/SWISSPROT;Acc:Q8IMQ6] [CG33083-RA]	Gustatory receptor 97a	Gustatory receptor 97a CG33083-PA [Drosophila melanogaster]	10710312; 16139201	Dmel_CG33083	GO:50909(sensory perception of taste)	GO:8527(taste receptor activity)	GO:16021(integral to membrane)	NM_176570	Dm.23043	117338
A_09_P037786	0.637014	0.0130173	P	9357.73	14681.1	NM_080345		CG1697-RB	rho-4	fly|CG1697-RB|fly|CG1697-RA|fly|CG1697-RC|ref|NM_080345	rhomboid-4 CG1697-PC, isoform C [Source:RefSeq_peptide;Acc:NP_727539] [CG1697-RB]	rhomboid-4	rhomboid-4 CG1697-PB, isoform B [Drosophila melanogaster]	10887159; 11023685; 12169630; 15084467	Dmel_CG1697	GO:7398(ectoderm development); GO:7292(female gamete generation); GO:7399(nervous system development)	GO:5509(calcium ion binding); GO:5102(receptor binding); GO:5057(receptor signaling protein activity); GO:8236(serine-type peptidase activity)	GO:16021(integral to membrane); GO:5886(plasma membrane)	NM_080345	Dm.1673	32109
A_09_P050976	1.55343	0.0254189	P	30169.6	20172.8	NM_001032052		CG33715-RE	Msp-300	fly|CG33715-RE|ref|NM_001032052|dgc|GH02446|gb|BT003623	Muscle-specific protein 300 CG33715-PE, isoform E [Source:RefSeq_peptide;Acc:NP_001027223] [CG33715-RE]	Muscle-specific protein 300	Muscle-specific protein 300 CG33715-PD, isoform D [Drosophila melanogaster]	16337624; 1289062; 7732594; 9013930; 9025063; 10908588; 11486054; 11742088; 11779831; 12351791; 12376554; 12408964; 12417656; 12736298; 12888516	Dmel_CG33715	GO:7049(cell cycle); GO:7059(chromosome segregation); GO:910(cytokinesis); GO:7010(cytoskeleton organization and biogenesis); GO:7498(mesoderm development); GO:7067(mitosis)	GO:3779(actin binding); GO:19237(centromeric DNA binding); GO:8092(cytoskeletal protein binding); GO:3725(double-stranded RNA binding); GO:3676(nucleic acid binding)	GO:15629(actin cytoskeleton); GO:8305(integrin complex)	NM_001032051	Dm.20325	3771968
A_09_P043811	1.7532	0.0441861	P	8651.31	5155.32	CG5670-RE		CG5670-RE	Atpalpha	fly|CG5670-RE|fly|CG5670-RB|fly|CG5670-RH|fly|CG5670-RC	Sodium/potassium-transporting ATPase alpha chain (EC 3.6.3.9) (Sodium pump) (Na+/K+ ATPase). [Source:Uniprot/SWISSPROT;Acc:P13607] [CG5670-RE]
A_09_P153315	0.600029	0.0149878	P	82.631	140.202	BT029964		BT029964	Fas3	gb|BT029964|tc|TC219243	Drosophila melanogaster IP17819 full insert cDNA. [BT029964]	Fasciclin 3	IP17819p		FLYBASE:FBgn0000636; GI:124248436					Dm.6733
A_09_P150090	2.27931	0.0124129	P,A	83.7471	35.6821	NM_169853		CG3619-RB	Dl	fly|CG3619-RB|ref|NM_169853|dgc|LD21369|dgc|LD19584	Neurogenic locus protein delta precursor. [Source:Uniprot/SWISSPROT;Acc:P10041] [CG3619-RB]	Delta	Delta CG3619-PA, isoform A [Drosophila melanogaster]	17215308; 17065551; 17107776; 16542648; 16487968; 16459304; 16459303; 15760463; 15579696; 15576412; 15469974; 15469967; 15020426; 14654840; 12954721; 14536057; 12632175; 12603025; 14627723; 9651468; 12591935; 12175491; 12230979; 1295737; 1333807; 1339662; 1339674; 1365402; 1383233; 1418999; 1419850; 1482114; 1482116; 1496555; 1525506; 1525515; 1551482; 1577196; 1618155; 1652801; 1657403; 1668185;…	Dmel_CG3619	GO:7219(Notch signaling pathway); GO:7464(R3/R4 cell fate commitment); GO:45465(R8 cell differentiation); GO:7015(actin filament organization); GO:48800(antennal morphogenesis); GO:7475(apposition of dorsal and ventral imaginal disc-derived wing surfaces); GO:8356(asymmetric cell division); GO:8407(bristle morphogenesis); GO:7155(cell adhesion); GO:1708(cell fate specification); GO:8283(cell prol…	GO:5112(Notch binding); GO:5509(calcium ion binding); GO:5102(receptor binding); GO:4871(signal transducer activity)	GO:16021(integral to membrane); GO:5886(plasma membrane)	NM_057916	Dm.7687	42313	KEGG pathway: Notch signaling pathway 04330
A_09_P202040	1.52209	0.0155478	P	17586.6	11512.4	NM_167247		CG16944-RC	sesB	fly|CG16944-RC|fly|CG16944-RD|ref|NM_167246|ref|NM_167247	ADP,ATP carrier protein (ADP/ATP translocase) (Adenine nucleotide translocator) (ANT) (Stress sensitive B protein). [Source:Uniprot/SWISSPROT;Acc:Q26365] [CG16944-RC]	stress-sensitive B	stress-sensitive B CG16944-PA, isoform A [Drosophila melanogaster]	16076285; 14668379; 1387687; 2499512; 3080355; 3091446; 4999628; 6479445; 6770227; 6790246; 6806144; 7520869; 9647634; 9720289; 9755207; 10511565; 10747067; 11139510; 11404335; 11744370; 11779831; 12015603; 12424521; 12912909	Dmel_CG16944	GO:15866(ADP transport); GO:15867(ATP transport); GO:6812(cation transport); GO:7629(flight behavior); GO:6139(nucleobase, nucleoside, nucleotide and nucleic acid metabolic process); GO:9612(response to mechanical stimulus)	GO:5471(ATP:ADP antiporter activity); GO:5488(binding); GO:5386(carrier activity)	GO:16021(integral to membrane); GO:5740(mitochondrial envelope); GO:5743(mitochondrial inner membrane)	NM_078554	Dm.21507	32007
A_09_P195965	1.65785	0.00979865	P	2548.1	1513.92	NM_170019		CG5315-RC	CG5315	fly|CG5315-RC|fly|CG5315-RB|fly|CG5315-RA|ref|NM_170019	ADIPOR-like receptor CG5315. [Source:Uniprot/SWISSPROT;Acc:Q9VCY8] [CG5315-RC]	CG5315	CG5315-PA, isoform A [Drosophila melanogaster]		Dmel_CG5315	GO:19395(fatty acid oxidation); GO:9755(hormone-mediated signaling)	GO:42562(hormone binding)	GO:16021(integral to membrane)	NM_142804	Dm.11569	42656
A_09_P183115	1.80985	0.00645795	P	15743.1	8708.81	CG8663-RD		CG8663-RD	nrv3	fly|CG8663-RD|fly|CG8663-RC|fly|CG8663-RA|fly|CG8663-RB	nervana 3 CG8663-PA, isoform A [Source:RefSeq_peptide;Acc:NP_610108] [CG8663-RD]
A_09_P188045	1.98194	0.0244134	P	2892.07	1451.92	CG1522-RE		CG1522-RE	cac	fly|CG1522-RE|fly|CG1522-RF|fly|CG1522-RI|fly|CG1522-RJ	Voltage-dependent calcium channel type A alpha-1 subunit (Cacophony protein) (Nightblind A protein) (No-on-transient B protein) (Dmca1A). [Source:Uniprot/SWISSPROT;Acc:P91645] [CG1522-RE]
A_09_P078541	1.81677	0.16607	P	501.625	224.527	NM_078829		CG16960-RA	Or33a	fly|CG16960-RA|ref|NM_078829|tc|TC204649	Odorant receptor 33a. [Source:Uniprot/SWISSPROT;Acc:P81914] [CG16960-RA]	Odorant receptor 33a	Odorant receptor 33a CG16960-PA [Drosophila melanogaster]	10069338; 10089887; 10458908; 10943835; 10943836; 11257221; 11914382; 12782114; 14608037; 16139209; 16332533	Dmel_CG16960	GO:7186(G-protein coupled receptor protein signaling pathway); GO:7267(cell-cell signaling); GO:7608(sensory perception of smell)	GO:5549(odorant binding); GO:4984(olfactory receptor activity)	GO:16021(integral to membrane)	NM_078829	Dm.26795	34601
A_09_P197050	1.63798	0.219703	P	1129.17	601.205	TC206413		TC206413	TC206413	tc|TC206413	AE003464 CG4356-PA, isoform A {Drosophila melanogaster} (exp=0; wgp=1; cg=0), complete [TC206413]
A_09_P050461	1.87892	0.00556505	P	11048.9	6108.35	NM_001032052		CG33715-RE	Msp-300	fly|CG33715-RE|ref|NM_001032052|dgc|LP10936|gb|AY061561	Muscle-specific protein 300 CG33715-PE, isoform E [Source:RefSeq_peptide;Acc:NP_001027223] [CG33715-RE]	Muscle-specific protein 300	Muscle-specific protein 300 CG33715-PD, isoform D [Drosophila melanogaster]	16337624; 1289062; 7732594; 9013930; 9025063; 10908588; 11486054; 11742088; 11779831; 12351791; 12376554; 12408964; 12417656; 12736298; 12888516	Dmel_CG33715	GO:7049(cell cycle); GO:7059(chromosome segregation); GO:910(cytokinesis); GO:7010(cytoskeleton organization and biogenesis); GO:7498(mesoderm development); GO:7067(mitosis)	GO:3779(actin binding); GO:19237(centromeric DNA binding); GO:8092(cytoskeletal protein binding); GO:3725(double-stranded RNA binding); GO:3676(nucleic acid binding)	GO:15629(actin cytoskeleton); GO:8305(integrin complex)	NM_001032051	Dm.20325	3771968
A_09_P196770	0.650475	0.208944	P	138.025	179.999	NM_206022		CG33492-RA	CG33492	fly|CG33492-RA|ref|NM_206022|tc|TC205620	CG33492-PA [Source:RefSeq_peptide;Acc:NP_995744] [CG33492-RA]	CG33492	CG33492-PA [Drosophila melanogaster]		Dmel_CG33492	GO:35235(ionotropic glutamate receptor signaling pathway)	GO:4970(ionotropic glutamate receptor activity)	GO:16021(integral to membrane)	NM_206022	Dm.21941	2768714
A_09_P040356	1.55341	0.0373002	P	1336.82	864.386	NM_133125		CG7537-RB	inx5	fly|CG7537-RB|ref|NM_133125|gb|AY057372|gb|BT031084	Innexin inx5. [Source:Uniprot/SWISSPROT;Acc:Q9VWL5] [CG7537-RB]	inx5	inx5 CG7537-PB [Drosophila melanogaster]	11340620; 11960713; 11973283; 16139277	Dmel_CG7537	GO:7165(signal transduction)	GO:15286(innexin channel activity)	GO:5921(gap junction); GO:16021(integral to membrane)	NM_133125	Dm.5292	32901
A_09_P131350	0.637136	0.0130381	P	5592.02	8676.13	NM_080359		CG11822-RB	nAcRbeta-21C	fly|CG11822-RB|fly|CG11822-RA|ref|NM_164386|ref|NM_080359	nicotinic acetylcholine receptor beta 21C CG11822-PB, isoform B [Source:RefSeq_peptide;Acc:NP_722638] [CG11822-RB]	nicotinic acetylcholine receptor beta 21C	nicotinic acetylcholine receptor beta 21C CG11822-PB, isoform B [Drosophila melanogaster]	10798390; 11953451; 11973307; 12436418; 12486703; 12820891; 15716490; 15770687; 16077094	Dmel_CG11822	GO:6811(ion transport)	GO:30594(neurotransmitter receptor activity); GO:4889(nicotinic acetylcholine-activated cation-selective channel activity)	GO:5892(nicotinic acetylcholine-gated receptor-channel complex); GO:45211(postsynaptic membrane)	NM_164386	Dm.248	33228
A_09_P054641	0.512927	0.00146543	P,A	60.0079	123.748	NM_140133		CG14157-RA	Or67d	fly|CG14157-RA|ref|NM_140133|tc|TC204412	Putative odorant receptor 67d. [Source:Uniprot/SWISSPROT;Acc:Q9VT92] [CG14157-RA]	Or67d	Or67d CG14157-PA [Drosophila melanogaster]	17392786; 11914382; 12782114; 14608037; 16139208; 16139209	Dmel_CG14157	GO:7186(G-protein coupled receptor protein signaling pathway); GO:7608(sensory perception of smell)	GO:5549(odorant binding); GO:4984(olfactory receptor activity)	GO:16021(integral to membrane)	NM_140133	Dm.27107	39191
A_09_P128765	0.660841	0.416872	P	82.1538	126.613	AF538352		AF538352	CG13575	gb|AF538352|tc|TC202107	Drosophila melanogaster G-protein coupled receptor mRNA, complete cds. [AF538352]	CG13575	G-protein coupled receptor		GI:33331364					Dm.15008
A_09_P194995	1.85695	0.00581421	P	11421.4	6099.59	CG8663-RD		CG8663-RD	nrv3	fly|CG8663-RD|fly|CG8663-RC|fly|CG8663-RA|fly|CG8663-RB	nervana 3 CG8663-PA, isoform A [Source:RefSeq_peptide;Acc:NP_610108] [CG8663-RD]
A_09_P077611	0.59679	0.000146	P	13418.9	22533.4	NM_130615		CG4313-RB	CG4313	fly|CG4313-RB|fly|CG4313-RA|ref|NM_001038735|ref|NM_130615	CG4313-PB, isoform B [Source:RefSeq_peptide;Acc:NP_001033824] [CG4313-RB]	CG4313	CG4313-PB, isoform B [Drosophila melanogaster]	10908591; 11337470; 11519072; 14691551	Dmel_CG4313	GO:7186(G-protein coupled receptor protein signaling pathway)	GO:4930(G-protein coupled receptor activity); GO:1584(rhodopsin-like receptor activity)	GO:16021(integral to membrane); GO:5886(plasma membrane)	NM_001038735	Dm.2215	31169
A_09_P013056	1.66598	0.0474964	P	4742.2	2844.47	CG10844-RA		CG10844-RA	Rya-r44F	fly|CG10844-RA|fly|CG10844-RC|fly|CG10844-RB|fly|CG10844-RD	Ryanodine receptor 44F. [Source:Uniprot/SWISSPROT;Acc:Q24498] [CG10844-RA]
A_09_P064216	1.76763	0.127371	P,A	45.8067	22.1226	NM_165371		CG31622-RC	Gr39a	fly|CG31622-RC|ref|NM_165371|tc|TC204607	Putative gustatory receptor 39a, isoform A. [Source:Uniprot/SWISSPROT;Acc:P58959] [CG31622-RC]	Gustatory receptor 39a	Gustatory receptor 39a CG31622-PB, isoform B [Drosophila melanogaster]	10710312; 11257221; 11516643; 15321064; 15377795; 16139201	Dmel_CG31622	GO:50909(sensory perception of taste)	GO:8527(taste receptor activity)	GO:16021(integral to membrane)	NM_165370	Dm.27684	117346
A_09_P211305	1.85473	0.00588758	P	3423.81	1844.21	CG32547-RB		CG32547-RB	CG32547	fly|CG32547-RB|gb|AY240945	This gene is referred to in FlyBase by the symbol CG32547 (FBgn0052547). It has the cytological map location 17B1-17B3. Its sequence location is X:18337843..18356383. Its molecular function is described as neuropeptide receptor activity. It is...
A_09_P164390	1.50088	0.028185	P	2180.74	1457.41	NM_080192		CG10449-RA	Catsup	fly|CG10449-RA|ref|NM_080192|dgc|LD23513|gb|AF216584	Protein catecholamines up. [Source:Uniprot/SWISSPROT;Acc:Q9V3A4] [CG10449-RA]	Catecholamines up	Catecholamines up CG10449-PA [Drosophila melanogaster]	16682353; 826448; 1783295; 3007281; 6425116; 6790250; 7859742; 8176361; 8647399; 8683095; 9115734; 9892357; 10231582; 10471706; 10471719; 12702650; 15189334; 15454546; 15509557	Dmel_CG10449	GO:30001(metal ion transport); GO:7300(nurse cell to oocyte transport (sensu Insecta)); GO:42069(regulation of catecholamine metabolic process)	GO:46873(metal ion transporter activity)	GO:5887(integral to plasma membrane)	NM_080192	Dm.12530	48805
A_09_P198400	1.64015	0.0102723	P	2195.94	1339.9	NM_079105		CG4084-RA	l(2)not	fly|CG4084-RA|ref|NM_079105|dgc|SD03142|gb|BT024214	Lethal(2)neighbour of tid protein (NOT56) (NOT45). [Source:Uniprot/SWISSPROT;Acc:Q27333] [CG4084-RA]	lethal (2) neighbor of tid	lethal (2) neighbor of tid CG4084-PA [Drosophila melanogaster]	7758246; 8666267; 8809105; 9342399; 9373138; 10368435; 11782446; 12464307; 15020472	Dmel_CG4084		GO:30(mannosyltransferase activity)	GO:30176(integral to endoplasmic reticulum membrane)	NM_079105	Dm.2569	37754	KEGG pathway: Glycan structures - biosynthesis 1 01030; KEGG pathway: N-Glycan biosynthesis 00510
A_09_P064341	1.68617	0.278923	P	437.573	209.964	NM_206347		CG33264-RB	Or69a	fly|CG33264-RB|ref|NM_206347|tc|NP535693|tc|TC204362	Putative odorant receptor 69a, isoform B. [Source:Uniprot/SWISSPROT;Acc:P82985] [CG33264-RB]	Odorant receptor 69a	Odorant receptor 69a CG33264-PA, isoform A [Drosophila melanogaster]	10943835; 10943836; 11914382; 12782114; 14608037; 16139208; 16139209	Dmel_CG33264	GO:7608(sensory perception of smell)	GO:5549(odorant binding); GO:4984(olfactory receptor activity)	GO:16021(integral to membrane)	NM_206348	Dm.26498	2768964
A_09_P195260	2.11081	0.00131174	P	16094.9	7572.97	NM_057693		CG4799-RA	Pen	fly|CG4799-RA|ref|NM_057693|dgc|LD24935|dgc|LP03126	Importin alpha subunit (Karyopherin alpha subunit) (Pendulin). [Source:Uniprot/SWISSPROT;Acc:P52295] [CG4799-RA]	Pendulin	Pendulin CG4799-PA [Drosophila melanogaster]	12490175; 12435357; 7565597; 7749327; 7790349; 7790350; 8224829; 8417324; 8640222; 9391096; 9396726; 9406612; 9491068; 9540809; 10049924; 10471706; 10842307; 10882518; 11116097; 11429277; 11546751; 12019231; 12042820; 12042821; 12408870; 12626737; 12646868; 12655640; 14704178; 15001111; 15204079; 15922834	Dmel_CG4799	GO:6607(NLS-bearing substrate import into nucleus); GO:8283(cell proliferation); GO:16482(cytoplasmic transport); GO:7303(cytoplasmic transport, nurse cell to oocyte); GO:42332(gravitaxis); GO:48542(lymph gland development); GO:7301(ovarian ring canal formation); GO:6606(protein import into nucleus); GO:59(protein import into nucleus, docking); GO:7291(sperm individualization)	GO:8320(protein carrier activity)	GO:15629(actin cytoskeleton); GO:5737(cytoplasm); GO:5643(nuclear pore); GO:5634(nucleus)	NM_057693	Dm.3560	34338
A_09_P056861	1.8205	0.00343512	P	807.473	446.537	NM_169314		CG31405-RA	Gr85a	fly|CG31405-RA|ref|NM_169314|tc|TC204280	Putative gustatory receptor 85a. [Source:Uniprot/SWISSPROT;Acc:Q8INM9] [CG31405-RA]	Gustatory receptor 85a	Gustatory receptor 85a CG31405-PA [Drosophila melanogaster]	11516643; 15377795; 16139201	Dmel_CG31405	GO:50909(sensory perception of taste)	GO:8527(taste receptor activity)	GO:16021(integral to membrane)	NM_169314	Dm.26363	117475
A_09_P056911	1.81274	0.00508407	P	938.552	526.762	NM_139357		CG13788-RA	Gr28b	fly|CG13788-RA|ref|NM_139357|tc|TC203276	Putative gustatory receptor 28b. [Source:Uniprot/SWISSPROT;Acc:Q9VM08] [CG13788-RA]	Gustatory receptor 28b	Gustatory receptor 28b CG13788-PA, isoform A [Drosophila melanogaster]	10710312; 11257221; 11301013; 11516643; 14608037; 15202999; 16139201	Dmel_CG13788	GO:50909(sensory perception of taste)	GO:8527(taste receptor activity)	GO:16021(integral to membrane)	NM_139357	Dm.26373	117496
A_09_P064176	0.474056	0.172167	P,A	50.5442	113.235	NM_166489		CG13491-RA	Gr58c	fly|CG13491-RA|ref|NM_166489|tc|TC203970	Putative gustatory receptor 58c. [Source:Uniprot/SWISSPROT;Acc:Q9W2B2] [CG13491-RA]	Gustatory receptor 58c	Gustatory receptor 58c CG13491-PA [Drosophila melanogaster]	10710312; 11257221; 11516643; 14608037; 15377795; 16139201	Dmel_CG13491	GO:50909(sensory perception of taste)	GO:8527(taste receptor activity)	GO:16021(integral to membrane)	NM_166489	Dm.26998	37501
A_09_P033431	0.608182	0.000296	P	15138.7	24443.4	NM_140590		CG5027-RA	CG5027	fly|CG5027-RA|ref|NM_140590|dgc|LD24073|gb|AY051696	CG5027-PA [Source:RefSeq_peptide;Acc:NP_648847] [CG5027-RA]	CG5027	CG5027-PA [Drosophila melanogaster]	12766950; 14963491	Dmel_CG5027		GO:5509(calcium ion binding); GO:9055(electron carrier activity); GO:3756(protein disulfide isomerase activity); GO:15035(protein disulfide oxidoreductase activity)	GO:16021(integral to membrane)	NM_140590	Dm.3366	39775
A_09_P064131	1.86501	0.00139662	P	875.287	475.615	NM_176570		CG33083-RA	Gr97a	fly|CG33083-RA|ref|NM_176570|tc|TC203785|tc|TC205736	Putative gustatory receptor 97a. [Source:Uniprot/SWISSPROT;Acc:Q8IMQ6] [CG33083-RA]	Gustatory receptor 97a	Gustatory receptor 97a CG33083-PA [Drosophila melanogaster]	10710312; 16139201	Dmel_CG33083	GO:50909(sensory perception of taste)	GO:8527(taste receptor activity)	GO:16021(integral to membrane)	NM_176570	Dm.23043	117338
A_09_P037786	0.637014	0.0130173	P	9357.73	14681.1	NM_080345		CG1697-RB	rho-4	fly|CG1697-RB|fly|CG1697-RA|fly|CG1697-RC|ref|NM_080345	rhomboid-4 CG1697-PC, isoform C [Source:RefSeq_peptide;Acc:NP_727539] [CG1697-RB]	rhomboid-4	rhomboid-4 CG1697-PB, isoform B [Drosophila melanogaster]	10887159; 11023685; 12169630; 15084467	Dmel_CG1697	GO:7398(ectoderm development); GO:7292(female gamete generation); GO:7399(nervous system development)	GO:5509(calcium ion binding); GO:5102(receptor binding); GO:5057(receptor signaling protein activity); GO:8236(serine-type peptidase activity)	GO:16021(integral to membrane); GO:5886(plasma membrane)	NM_080345	Dm.1673	32109
A_09_P078566	0.647562	0.213514	P	79.1049	117.273	NM_058077		CG4231-RA	Or22b	fly|CG4231-RA|ref|NM_058077|gb|AF127924|tc|TC203691	Odorant receptor 22b. [Source:Uniprot/SWISSPROT;Acc:P81910] [CG4231-RA]	Odorant receptor 22b	Odorant receptor 22b CG4231-PA [Drosophila melanogaster]	10069338; 10089887; 10458908; 10710312; 10943835; 10943836; 11257221; 11481495; 11874920; 11914382; 12628173; 12782114; 14608037; 15210116; 15313555; 15339651; 16139208	Dmel_CG4231	GO:7186(G-protein coupled receptor protein signaling pathway); GO:7267(cell-cell signaling); GO:7608(sensory perception of smell)	GO:5549(odorant binding); GO:4984(olfactory receptor activity)	GO:30425(dendrite); GO:16021(integral to membrane)	NM_058077	Dm.4820	33336
A_09_P042341	1.74965	0.146434	P	1169.23	633.025	NM_167004		CG3665-RC	Fas2	fly|CG3665-RC|fly|CG3665-RB|ref|NM_167005|ref|NM_167004	Fasciclin-2 precursor (Fasciclin II) (FAS II). [Source:Uniprot/SWISSPROT;Acc:P34082] [CG3665-RC]	Fasciclin 2	Fasciclin 2 CG3665-PA, isoform A [Drosophila melanogaster]	15976083; 16055111; 15056617; 12702654; 12091308; 1339680; 1371458; 1638134; 1913818; 1957349; 1965067; 2132825; 2558050; 7479828; 7527841; 7535838; 7546732; 7576648; 7585933; 7603568; 7607085; 7646884; 7671823; 7689772; 7707975; 7774017; 7790877; 7821224; 7913013; 7915669; 7917288; 7917289; 7946345; 7956831; 8062386; 8140256; 8331336; 8331339; 8404529; 8454205; 8513498; 8575623; 8580708; 8656281…	Dmel_CG3665	GO:1746(Bolwig's organ morphogenesis); GO:7413(axonal fasciculation); GO:48149(behavioral response to ethanol); GO:7398(ectoderm development); GO:7156(homophilic cell adhesion); GO:48803(imaginal disc-derived male genitalia morphogenesis); GO:7612(learning); GO:7611(learning and/or memory); GO:16319(mushroom body development); GO:7528(neuromuscular junction development); GO:48667(neuron morphogen…		GO:30424(axon); GO:5737(cytoplasm); GO:16021(integral to membrane); GO:5886(plasma membrane); GO:45211(postsynaptic membrane); GO:42734(presynaptic membrane)	NM_080327	Dm.1687	31364
A_09_P050976	1.55343	0.0254189	P	30169.6	20172.8	NM_001032052		CG33715-RE	Msp-300	fly|CG33715-RE|ref|NM_001032052|dgc|GH02446|gb|BT003623	Muscle-specific protein 300 CG33715-PE, isoform E [Source:RefSeq_peptide;Acc:NP_001027223] [CG33715-RE]	Muscle-specific protein 300	Muscle-specific protein 300 CG33715-PD, isoform D [Drosophila melanogaster]	16337624; 1289062; 7732594; 9013930; 9025063; 10908588; 11486054; 11742088; 11779831; 12351791; 12376554; 12408964; 12417656; 12736298; 12888516	Dmel_CG33715	GO:7049(cell cycle); GO:7059(chromosome segregation); GO:910(cytokinesis); GO:7010(cytoskeleton organization and biogenesis); GO:7498(mesoderm development); GO:7067(mitosis)	GO:3779(actin binding); GO:19237(centromeric DNA binding); GO:8092(cytoskeletal protein binding); GO:3725(double-stranded RNA binding); GO:3676(nucleic acid binding)	GO:15629(actin cytoskeleton); GO:8305(integrin complex)	NM_001032051	Dm.20325	3771968
A_09_P043811	1.7532	0.0441861	P	8651.31	5155.32	CG5670-RE		CG5670-RE	Atpalpha	fly|CG5670-RE|fly|CG5670-RB|fly|CG5670-RH|fly|CG5670-RC	Sodium/potassium-transporting ATPase alpha chain (EC 3.6.3.9) (Sodium pump) (Na+/K+ ATPase). [Source:Uniprot/SWISSPROT;Acc:P13607] [CG5670-RE]
A_09_P153315	0.600029	0.0149878	P	82.631	140.202	BT029964		BT029964	Fas3	gb|BT029964|tc|TC219243	Drosophila melanogaster IP17819 full insert cDNA. [BT029964]	Fasciclin 3	IP17819p		FLYBASE:FBgn0000636; GI:124248436					Dm.6733
A_09_P024301	0.64868	0.34348	P,A	31.8891	45.0901	NM_078900		CG12754-RA	Or42b	fly|CG12754-RA|ref|NM_078900|tc|TC204246	Putative odorant receptor 42b. [Source:Uniprot/SWISSPROT;Acc:Q9V9I4] [CG12754-RA]	Odorant receptor 42b	Odorant receptor 42b CG12754-PA [Drosophila melanogaster]	10943835; 10943836; 11257221; 11914382; 12588842; 12782114; 12827380; 16139208; 16139209	Dmel_CG12754	GO:7186(G-protein coupled receptor protein signaling pathway); GO:7267(cell-cell signaling); GO:7608(sensory perception of smell)	GO:5549(odorant binding); GO:4984(olfactory receptor activity)	GO:16021(integral to membrane)	NM_078900	Dm.26859	35516
A_09_P006011	1.85902	0.0861191	P	521.126	271.416	NM_176119		CG33135-RA	KCNQ	fly|CG33135-RA|fly|CG33135-RB|ref|NM_176120|ref|NM_176119	KCNQ potassium channel CG33135-PB, isoform B [Source:RefSeq_peptide;Acc:NP_788299] [CG33135-RA]	KCNQ potassium channel	KCNQ potassium channel CG33135-PB, isoform B [Drosophila melanogaster]	16267222; 11779831; 15221030; 15527959	Dmel_CG33135	GO:6936(muscle contraction); GO:6813(potassium ion transport); GO:7268(synaptic transmission)	GO:5249(voltage-gated potassium channel activity)	GO:16021(integral to membrane); GO:8076(voltage-gated potassium channel complex)	NM_176119	Dm.33612	36071
A_09_P199450	2.3488	0.527724	P	996.829	207.433	CG8930-RA		CG8930-RA	rk	fly|CG8930-RA|fly|CG8930-RB|fly|CG8930-RD|fly|CG8930-RC	rickets CG8930-PE, isoform E [Source:RefSeq_peptide;Acc:NP_788048] [CG8930-RA]
A_09_P210715	1.64746	0.0641338	P	1925.22	1214.81	NM_079283		CG14176-RB	Or67b	fly|CG14176-RB|ref|NM_079283|gb|BT023373|gb|BT023368	Putative odorant receptor 67b. [Source:Uniprot/SWISSPROT;Acc:Q9VT20] [CG14176-RB]	Odorant receptor 67b	Odorant receptor 67b CG14176-PB [Drosophila melanogaster]	10943835; 11914382; 12782114; 14608037; 16139208; 16139209; 16332533	Dmel_CG14176	GO:7608(sensory perception of smell)	GO:5549(odorant binding); GO:4984(olfactory receptor activity)	GO:16021(integral to membrane)	NM_079283	Dm.27099	39120
A_09_P074706	1.59223	0.155101	P,A	88.3386	54.4111	NM_169505		CG8795-RA	CG8795	fly|CG8795-RA|fly|CG8795-RC|fly|CG8795-RB|ref|NM_169505	CG8795-PC, isoform C [Source:RefSeq_peptide;Acc:NP_001014618] [CG8795-RA]	CG8795	CG8795-PA, isoform A [Drosophila melanogaster]	10908591; 11381038; 11519072; 12177421; 12586820; 12951076	Dmel_CG8795	GO:7186(G-protein coupled receptor protein signaling pathway); GO:6118(electron transport)	GO:4930(G-protein coupled receptor activity); GO:5507(copper ion binding); GO:9055(electron carrier activity); GO:16520(growth hormone-releasing hormone receptor activity); GO:8188(neuropeptide receptor activity); GO:1653(peptide receptor activity)	GO:16021(integral to membrane); GO:5887(integral to plasma membrane)	NM_169505	Dm.14717	41638
A_09_P150090	2.27931	0.0124129	P,A	83.7471	35.6821	NM_169853		CG3619-RB	Dl	fly|CG3619-RB|ref|NM_169853|dgc|LD21369|dgc|LD19584	Neurogenic locus protein delta precursor. [Source:Uniprot/SWISSPROT;Acc:P10041] [CG3619-RB]	Delta	Delta CG3619-PA, isoform A [Drosophila melanogaster]	17215308; 17065551; 17107776; 16542648; 16487968; 16459304; 16459303; 15760463; 15579696; 15576412; 15469974; 15469967; 15020426; 14654840; 12954721; 14536057; 12632175; 12603025; 14627723; 9651468; 12591935; 12175491; 12230979; 1295737; 1333807; 1339662; 1339674; 1365402; 1383233; 1418999; 1419850; 1482114; 1482116; 1496555; 1525506; 1525515; 1551482; 1577196; 1618155; 1652801; 1657403; 1668185;…	Dmel_CG3619	GO:7219(Notch signaling pathway); GO:7464(R3/R4 cell fate commitment); GO:45465(R8 cell differentiation); GO:7015(actin filament organization); GO:48800(antennal morphogenesis); GO:7475(apposition of dorsal and ventral imaginal disc-derived wing surfaces); GO:8356(asymmetric cell division); GO:8407(bristle morphogenesis); GO:7155(cell adhesion); GO:1708(cell fate specification); GO:8283(cell prol…	GO:5112(Notch binding); GO:5509(calcium ion binding); GO:5102(receptor binding); GO:4871(signal transducer activity)	GO:16021(integral to membrane); GO:5886(plasma membrane)	NM_057916	Dm.7687	42313	KEGG pathway: Notch signaling pathway 04330
A_09_P202040	1.52209	0.0155478	P	17586.6	11512.4	NM_167247		CG16944-RC	sesB	fly|CG16944-RC|fly|CG16944-RD|ref|NM_167246|ref|NM_167247	ADP,ATP carrier protein (ADP/ATP translocase) (Adenine nucleotide translocator) (ANT) (Stress sensitive B protein). [Source:Uniprot/SWISSPROT;Acc:Q26365] [CG16944-RC]	stress-sensitive B	stress-sensitive B CG16944-PA, isoform A [Drosophila melanogaster]	16076285; 14668379; 1387687; 2499512; 3080355; 3091446; 4999628; 6479445; 6770227; 6790246; 6806144; 7520869; 9647634; 9720289; 9755207; 10511565; 10747067; 11139510; 11404335; 11744370; 11779831; 12015603; 12424521; 12912909	Dmel_CG16944	GO:15866(ADP transport); GO:15867(ATP transport); GO:6812(cation transport); GO:7629(flight behavior); GO:6139(nucleobase, nucleoside, nucleotide and nucleic acid metabolic process); GO:9612(response to mechanical stimulus)	GO:5471(ATP:ADP antiporter activity); GO:5488(binding); GO:5386(carrier activity)	GO:16021(integral to membrane); GO:5740(mitochondrial envelope); GO:5743(mitochondrial inner membrane)	NM_078554	Dm.21507	32007
A_09_P195965	1.65785	0.00979865	P	2548.1	1513.92	NM_170019		CG5315-RC	CG5315	fly|CG5315-RC|fly|CG5315-RB|fly|CG5315-RA|ref|NM_170019	ADIPOR-like receptor CG5315. [Source:Uniprot/SWISSPROT;Acc:Q9VCY8] [CG5315-RC]	CG5315	CG5315-PA, isoform A [Drosophila melanogaster]		Dmel_CG5315	GO:19395(fatty acid oxidation); GO:9755(hormone-mediated signaling)	GO:42562(hormone binding)	GO:16021(integral to membrane)	NM_142804	Dm.11569	42656
A_09_P030856	1.50124	0.117246	P	1814.46	1153.58	NM_080340		CG2302-RA	nAcRalpha-7E	fly|CG2302-RA|ref|NM_080340|gb|Y15593|tc|NP027713	nicotinic Acetylcholine Receptor alpha 7E CG2302-PA [Source:RefSeq_peptide;Acc:NP_525079] [CG2302-RA]	nicotinic Acetylcholine Receptor alpha 7E	nicotinic Acetylcholine Receptor alpha 7E CG2302-PA [Drosophila melanogaster]	1445931; 9023722; 9681478; 10470487; 10798390; 11024458; 11035778; 11044730; 11825878; 11953451; 12436418; 12486703; 12820891; 15770687	Dmel_CG2302	GO:6812(cation transport); GO:6936(muscle contraction); GO:7270(nerve-nerve synaptic transmission); GO:7274(neuromuscular synaptic transmission)	GO:15464(acetylcholine receptor activity); GO:4889(nicotinic acetylcholine-activated cation-selective channel activity)	GO:5892(nicotinic acetylcholine-gated receptor-channel complex); GO:45211(postsynaptic membrane)	NM_080340	Dm.19217	31767

## Sheet: 5764
Probe ID	Cont vs. 0.2 Gy	t-test P-value	Flags	Raw	Control	Genbank	Gene Symbol	Name_1	GeneName_1	TopHit_1	Description_1	Description	Product	PubMedID	DBid	GO biological process	GO molecular function	GO cellular component	RefSeq	UniGene	Entrez Gene ID	Pathways	Function
A_09_P043876	1.53947	0.0146061	P	20890.3	13162.1	NM_079683		CG4550-RA	ninaE	fly|CG4550-RA|ref|NM_079683|dgc|RH01460|dgc|HL01686	Opsin Rh1 (Outer R1-R6 photoreceptor cells opsin) (Neither inactivation nor afterpotential E protein). [Source:Uniprot/SWISSPROT;Acc:P06002] [CG4550-RA]	neither inactivation nor afterpotential E	neither inactivation nor afterpotential E CG4550-PA [Drosophila melanogaster]	16756553; 15014127; 14769922; 1339673; 1398053; 1403087; 1422119; 1431838; 1534022; 1551579; 1608933; 1644830; 1689056; 1707759; 1726765; 1833511; 1838762; 1859395; 1913822; 1982113; 2010085; 2105166; 2105491; 2110249; 2117644; 2140105; 2163342; 2361011; 2437266; 2484341; 2521839; 2528612; 2580638; 2768273; 2953598; 2966681; 2968518; 2975615; 2985266; 3040524; 3097245; 3117994; 3930500; 6770840; …	Dmel_CG4550	GO:7186(G-protein coupled receptor protein signaling pathway); GO:8344(adult locomotory behavior); GO:8594(photoreceptor cell morphogenesis); GO:7602(phototransduction); GO:42052(rhabdomere development); GO:7601(visual perception)	GO:8020(G-protein coupled photoreceptor activity); GO:4930(G-protein coupled receptor activity)	GO:16023(cytoplasmic membrane-bound vesicle); GO:16027(inaD signaling complex); GO:16021(integral to membrane); GO:5771(multivesicular body); GO:16028(rhabdomere); GO:5791(rough endoplasmic reticulum); GO:5767(secondary lysosome); GO:16029(subrhabdomeral cisterna)	NM_079683	Dm.6744	42367
A_09_P186990	1.82101	0.00392988	P,M	3239.63	1803.44	NM_141885		CG3132-RA	Ect3	fly|CG3132-RA|ref|NM_141885|dgc|HL01076|gb|AY119565	Ect3 CG3132-PA [Source:RefSeq_peptide;Acc:NP_650142] [CG3132-RA]	Ect3	Ect3 CG3132-PA [Drosophila melanogaster]	11606746; 12032070; 12464180; 12505997; 12593803; 12593804; 15020472; 15501232; 16077094	Dmel_CG3132	GO:48102(autophagic cell death); GO:5975(carbohydrate metabolic process); GO:35071(salivary gland cell autophagic cell death)	GO:4565(beta-galactosidase activity)	GO:9341(beta-galactosidase complex); GO:5764(lysosome)	NM_141885	Dm.22982	41457	KEGG pathway: Galactose metabolism 00052; KEGG pathway: Glycan structures - degradation 01032; KEGG pathway: Glycerolipid metabolism 00561; KEGG pathway: Glycosaminoglycan degradation 00531; KEGG pathway: Glycosphingolipid biosynthesis - ganglioseries 00604; KEGG pathway: N-Glycan degradation 00511; KEGG pathway: Sphingolipid metabolism 00600

## Sheet: 16020
Probe ID	Cont vs. 0.2 Gy	t-test P-value	Flags	Raw	Control	Genbank	Gene Symbol	Name_1	GeneName_1	TopHit_1	Description_1	Description	Product	PubMedID	DBid	GO biological process	GO molecular function	GO cellular component	RefSeq	UniGene	Entrez Gene ID	Pathways	Function
A_09_P142535	1.92383	0.00341569	P	30524.7	15853	NM_206010		CG10664-RA	CG10664	fly|CG10664-RA|fly|CG10664-RB|ref|NM_136169|ref|NM_206010	CG10664-PA, isoform A [Source:RefSeq_peptide;Acc:NP_610013] [CG10664-RA]	CG10664	CG10664-PA, isoform A [Drosophila melanogaster]	11514451; 15324670	Dmel_CG10664	GO:6123(mitochondrial electron transport, cytochrome c to oxygen)	GO:4129(cytochrome-c oxidase activity)	GO:5743(mitochondrial inner membrane); GO:5751(mitochondrial respiratory chain complex IV); GO:5739(mitochondrion)	NM_136169	Dm.4187	35279	KEGG pathway: Oxidative phosphorylation 00190
A_09_P187395	2.22924	0.0201611	P	7919.1	3673.96	NM_138135		CG15860-RA	pain	fly|CG15860-RA|ref|NM_138135|dgc|RE03641|gb|AY268106	Transient receptor potential cation channel protein painless. [Source:Uniprot/SWISSPROT;Acc:Q9W0Y6] [CG15860-RA]	painless	painless CG15860-PA [Drosophila melanogaster]	17081265; 16647259; 14585595; 10798390; 10835395; 12705873; 12814565; 12815418; 12958599; 14624845; 15296748; 15681611; 15713838; 15731759	Dmel_CG15860	GO:6816(calcium ion transport); GO:50974(detection of mechanical stimulus during sensory perception); GO:9408(response to heat); GO:9612(response to mechanical stimulus); GO:19233(sensory perception of pain); GO:43052(thermotaxis)	GO:5262(calcium channel activity); GO:5216(ion channel activity)	GO:16021(integral to membrane)	NM_138135	Dm.14984	37985
A_09_P168055	1.67553	0.0092627	P	2911.74	1739.04	CG9012-RD		CG9012-RD	Chc	fly|CG9012-RD|fly|CG9012-RC|fly|CG9012-RA|fly|CG9012-RE	Clathrin heavy chain. [Source:Uniprot/SWISSPROT;Acc:P29742] [CG9012-RD]
A_09_P019681	0.624381	0.000261	P	13413.9	21760.8	NM_135110		CG11147-RB	CG11147	fly|CG11147-RB|fly|CG11147-RA|ref|NM_164658|ref|NM_135110	CG11147-PA, isoform A [Source:RefSeq_peptide;Acc:NP_608954] [CG11147-RB]	CG11147	CG11147-PB, isoform B [Drosophila melanogaster]	12097338; 15972463	Dmel_CG11147	GO:6810(transport)	GO:5524(ATP binding); GO:42626(ATPase activity, coupled to transmembrane movement of substances); GO:5215(transporter activity)	GO:43190(ATP-binding cassette (ABC) transporter complex); GO:16020(membrane)	NM_164658	Dm.22471	33803
A_09_P013421	0.661598	0.0173953	P	3072.15	4638.62	NM_164842		CG9552-RA	rost	fly|CG9552-RA|ref|NM_164842|dgc|LD22863|gb|AF006955	Protein rolling stone. [Source:Uniprot/SWISSPROT;Acc:O44252] [CG9552-RA]	rolling stone	rolling stone CG9552-PA [Drosophila melanogaster]	7615665; 7671823; 7860706; 8805325; 8817453; 8905296; 9087441; 9230076; 10199975; 10218153; 10507836; 10943831; 11352947; 11719206; 12111720; 14550529	Dmel_CG9552	GO:7498(mesoderm development); GO:7520(myoblast fusion); GO:7519(striated muscle development)		GO:16021(integral to membrane); GO:16020(membrane); GO:5886(plasma membrane)	NM_164842	Dm.7302	34222
A_09_P065031	0.564883	3.71e-05	P	8706.7	15593.1	NM_078766		CG9159-RA	Kr-h2	fly|CG9159-RA|ref|NM_078766|dgc|AT13922|gb|AY118281	Protein Kr-h2. [Source:Uniprot/SWISSPROT;Acc:Q9V447] [CG9159-RA]	Kruppel homolog 2	Kruppel homolog 2 CG9159-PA [Drosophila melanogaster]	11752406; 16118195	Dmel_CG9159			GO:16021(integral to membrane)	NM_078766	Dm.323	33859
A_09_P118270	1.54636	0.010734	P	851.364	556.653	CG1725-RB		CG1725-RB	dlg1	fly|CG1725-RB|fly|CG1725-RL|fly|CG1725-RH|fly|CG1725-RG	Discs large 1 tumor suppressor protein. [Source:Uniprot/SWISSPROT;Acc:P31007] [CG1725-RB]
A_09_P133140	0.645663	0.0142769	P	534.779	826.714	CG11988-RA		CG11988-RA	neur	fly|CG11988-RA|fly|CG11988-RB|fly|CG11988-RC|fly|CG11988-RD	Protein neuralized. [Source:Uniprot/SWISSPROT;Acc:P29503] [CG11988-RA]
A_09_P182680	1.70981	0.00833516	P	3973.39	2329.05	NM_078907		CG10106-RA	Tsp42Ee	fly|CG10106-RA|ref|NM_078907|dgc|RE12209|gb|AY075454	Tetraspanin 42Ee CG10106-PA [Source:RefSeq_peptide;Acc:NP_523631] [CG10106-RA]	Tetraspanin 42Ee	Tetraspanin 42Ee CG10106-PA [Drosophila melanogaster]	11122467; 12370414; 14519762; 15501232; 16129837	Dmel_CG10106			GO:16021(integral to membrane)	NM_078907	Dm.500	35614
A_09_P218645	1.856	0.0186373	P	3483.35	1927.48	BT015303		BT015303	NepYr	gb|BT015303	Drosophila melanogaster AT16733 full insert cDNA. [BT015303]	Neuropeptide Y receptor-like	AT16733p		GI:51092236					Dm.2344
A_09_P044936	1.86096	0.00421513	P	1734.91	932.698	NM_057862		CG17246-RA	Scs-fp	fly|CG17246-RA|fly|CG17246-RC|fly|CG17246-RB|ref|NM_057862	Succinate dehydrogenase [ubiquinone] flavoprotein subunit, mitochondrial precursor (EC 1.3.5.1) (FP) (Flavoprotein subunit of complex II). [Source:Uniprot/SWISSPROT;Acc:Q94523] [CG17246-RA]	Succinyl coenzyme A synthetase flavoprotein subunit	Succinyl coenzyme A synthetase flavoprotein subunit CG17246-PC, isoform C [Drosophila melanogaster]	10071211; 14680800; 15269770	Dmel_CG17246	GO:6118(electron transport); GO:6119(oxidative phosphorylation); GO:6099(tricarboxylic acid cycle)	GO:50660(FAD binding); GO:8177(succinate dehydrogenase (ubiquinone) activity); GO:4776(succinate-CoA ligase (GDP-forming) activity)	GO:5749(mitochondrial respiratory chain complex II)	NM_166344	Dm.4591	37228	KEGG pathway: Citrate cycle (TCA cycle) 00020; KEGG pathway: Oxidative phosphorylation 00190
A_09_P065746	1.64954	0.000357	P	2672.88	1639.51	CG6355-RB		CG6355-RB	CG6355	fly|CG6355-RB|fly|CG33981-RA|fly|CG6355-RA|fly|CG33981-RB	Putative FYVE finger-containing phosphoinositide kinase (EC 2.7.1.68) (1-phosphatidylinositol-4-phosphate 5-kinase) (PIP5K) (PtdIns(4)P-5- kinase). [Source:Uniprot/SWISSPROT;Acc:O96838] [CG6355-RB]
A_09_P220025	1.57406	0.0235688	P	1903.01	1226.53	NM_079974		CG3870-RA	chrw	fly|CG3870-RA|ref|NM_079974|dgc|LD47384|gb|AF209706	chrowded CG3870-PA [Source:RefSeq_peptide;Acc:NP_524713] [CG3870-RA]	chrowded	chrowded CG3870-PA [Drosophila melanogaster]	7789767; 10471706; 11102367; 11697911; 11805061	Dmel_CG3870	GO:6886(intracellular protein transport); GO:7041(lysosomal transport); GO:7422(peripheral nervous system development); GO:6898(receptor-mediated endocytosis); GO:17157(regulation of exocytosis); GO:7165(signal transduction); GO:7264(small GTPase mediated signal transduction)	GO:5525(GTP binding); GO:3924(GTPase activity)	GO:5886(plasma membrane)	NM_079974	Dm.1428	44172
A_09_P136650	1.79172	0.00677673	P	3328.69	1889.46	CG6703-RA		CG6703-RA	Caki	fly|CG6703-RA|fly|CG6703-RB|fly|CG6703-RD|fly|CG6703-RE	Calcium/calmodulin-dependent protein kinase (EC 2.7.11.17) (CAKI) (Peripheral plasma membrane protein CaMGUK). [Source:Uniprot/SWISSPROT;Acc:Q24210] [CG6703-RA]
A_09_P070466	0.571756	0.0003	P	142.059	248.747	NM_079731		CG17241-RA	Or94a	fly|CG17241-RA|ref|NM_079731|tc|TC204478	Putative odorant receptor 94a. [Source:Uniprot/SWISSPROT;Acc:Q9VCS9] [CG17241-RA]	Odorant receptor 94a	Odorant receptor 94a CG17241-PA [Drosophila melanogaster]	10943835; 10943836; 11257221; 11914382; 12782114; 14608037; 16139208; 16332533	Dmel_CG17241	GO:7186(G-protein coupled receptor protein signaling pathway); GO:7267(cell-cell signaling); GO:7608(sensory perception of smell)	GO:5549(odorant binding); GO:4984(olfactory receptor activity)	GO:16021(integral to membrane)	NM_079731	Dm.27602	42711
A_09_P196520	2.09867	0.0107652	P	1218.13	560.292	NM_168096		CG32245-RB	CG32245	fly|CG32245-RB|ref|NM_168096|dgc|GH04632|gb|AY060624	CG32245-PB, isoform B [Source:RefSeq_peptide;Acc:NP_729018] [CG32245-RB]	CG32245	CG32245-PC, isoform C [Drosophila melanogaster]		Dmel_CG32245	GO:7010(cytoskeleton organization and biogenesis)	GO:5200(structural constituent of cytoskeleton)	GO:16020(membrane)	NM_168095	Dm.2237	38562
A_09_P150520	0.577793	0.00601053	P	10309.4	18340.7	NM_057819		CG9258-RA	nrv1	fly|CG9258-RA|ref|NM_057819|gb|U22438|tc|TC211784	Sodium/potassium-transporting ATPase beta-1 chain (Sodium/potassium- dependent ATPase beta-1 subunit) (Protein nervana 1). [Source:Uniprot/SWISSPROT;Acc:Q24046] [CG9258-RA]	nervana 1	nervana 1 CG9258-PA [Drosophila melanogaster]	3320283; 6806816; 7540667; 7777518; 9648860; 9751137; 10452950; 10470487; 12695332; 12765609; 12782686; 12930776; 15131112; 15299033; 15501232; 15976174	Dmel_CG9258	GO:6813(potassium ion transport); GO:6814(sodium ion transport)	GO:16820(hydrolase activity, acting on acid anhydrides, catalyzing transmembrane movement of substances); GO:5391(sodium:potassium-exchanging ATPase activity)	GO:5886(plasma membrane); GO:5890(sodium:potassium-exchanging ATPase complex)	NM_057819	Dm.4821	33952
A_09_P029441	1.51685	0.0240017	P	19278.5	12332.1	NM_057693		CG4799-RA	Pen	fly|CG4799-RA|ref|NM_057693|dgc|LD24935|dgc|LP03126	Importin alpha subunit (Karyopherin alpha subunit) (Pendulin). [Source:Uniprot/SWISSPROT;Acc:P52295] [CG4799-RA]	Pendulin	Pendulin CG4799-PA [Drosophila melanogaster]	12490175; 12435357; 7565597; 7749327; 7790349; 7790350; 8224829; 8417324; 8640222; 9391096; 9396726; 9406612; 9491068; 9540809; 10049924; 10471706; 10842307; 10882518; 11116097; 11429277; 11546751; 12019231; 12042820; 12042821; 12408870; 12626737; 12646868; 12655640; 14704178; 15001111; 15204079; 15922834	Dmel_CG4799	GO:6607(NLS-bearing substrate import into nucleus); GO:8283(cell proliferation); GO:16482(cytoplasmic transport); GO:7303(cytoplasmic transport, nurse cell to oocyte); GO:42332(gravitaxis); GO:48542(lymph gland development); GO:7301(ovarian ring canal formation); GO:6606(protein import into nucleus); GO:59(protein import into nucleus, docking); GO:7291(sperm individualization)	GO:8320(protein carrier activity)	GO:15629(actin cytoskeleton); GO:5737(cytoplasm); GO:5643(nuclear pore); GO:5634(nucleus)	NM_057693	Dm.3560	34338
A_09_P056906	0.42342	0.013846	P,A	28.3625	57.6894	NM_165205		CG31747-RA	Gr36a	fly|CG31747-RA|ref|NM_165205|tc|TC204410	Putative gustatory receptor 36a. [Source:Uniprot/SWISSPROT;Acc:P58955] [CG31747-RA]	Gustatory receptor 36a	Gustatory receptor 36a CG31747-PA [Drosophila melanogaster]	10710312; 11516643; 16139201	Dmel_CG31747	GO:50909(sensory perception of taste)	GO:8527(taste receptor activity)	GO:16021(integral to membrane)	NM_165205	Dm.26372	117488
A_09_P044946	1.51902	0.0157101	P	19739.6	12788.6	NM_057654		CG9160-RA	mtacp1	fly|CG9160-RA|fly|CG9160-RB|ref|NM_057655|ref|NM_057654	Acyl carrier protein, mitochondrial precursor (ACP) (NADH-ubiquinone oxidoreductase 9.6 kDa subunit) (NADH-ubiquinone oxidoreductase acyl- carrier subunit). [Source:Uniprot/SWISSPROT;Acc:Q94519] [CG9160-RA]	mitochondrial acyl carrier protein 1	mitochondrial acyl carrier protein 1 CG9160-PB, isoform B [Drosophila melanogaster]	10071211; 10394906; 10471706; 11035778	Dmel_CG9160	GO:6633(fatty acid biosynthetic process); GO:6120(mitochondrial electron transport, NADH to ubiquinone)	GO:8137(NADH dehydrogenase (ubiquinone) activity); GO:3954(NADH dehydrogenase activity); GO:36(acyl carrier activity); GO:48037(cofactor binding); GO:31177(phosphopantetheine binding)	GO:5747(mitochondrial respiratory chain complex I); GO:5739(mitochondrion)	NM_057654	Dm.3108	38154	KEGG pathway: Oxidative phosphorylation 00190
A_09_P090675	1.67465	0.00857128	P	10711.1	6505.29	CG5670-RE		CG5670-RE	Atpalpha	fly|CG5670-RE|fly|CG5670-RB|fly|CG5670-RH|fly|CG5670-RC	Sodium/potassium-transporting ATPase alpha chain (EC 3.6.3.9) (Sodium pump) (Na+/K+ ATPase). [Source:Uniprot/SWISSPROT;Acc:P13607] [CG5670-RE]
A_09_P052341	1.6063	0.0175639	P	1796.19	1140.78	CG3725-RF		CG3725-RF	Ca-P60A	fly|CG3725-RF|fly|CG3725-RC|fly|CG3725-RB|fly|CG3725-RE	Calcium-transporting ATPase sarcoplasmic/endoplasmic reticulum type (EC 3.6.3.8) (Calcium pump). [Source:Uniprot/SWISSPROT;Acc:P22700] [CG3725-RF]
A_09_P032416	1.60253	0.0377803	P	5393.71	3396.54	NM_164818		CG13387-RA	emb	fly|CG13387-RA|ref|NM_164818|dgc|LD45706|dgc|GH01059	Exportin-1 (Chromosome region maintenance 1 protein) (Protein embargoed). [Source:Uniprot/SWISSPROT;Acc:Q9TVM2] [CG13387-RA]	embargoed	embargoed CG13387-PA [Drosophila melanogaster]	16027171; 14638854; 12538513; 9374400; 10471706; 10636888; 10924475; 11944946; 12743041; 14759367; 16496002	Dmel_CG13387	GO:7275(multicellular organismal development); GO:6611(protein export from nucleus); GO:59(protein import into nucleus, docking); GO:15031(protein transport)	GO:5049(nuclear export signal receptor activity); GO:5515(protein binding); GO:8565(protein transporter activity)	GO:5737(cytoplasm); GO:5643(nuclear pore)	NM_164818	Dm.3346	34167
A_09_P070051	1.50806	0.00170494	P	25628.8	16991	NM_142746		CG6022-RA	Cchl	fly|CG6022-RA|ref|NM_142746|dgc|HL08191|gb|AY118889	CG6022-PA [Source:RefSeq_peptide;Acc:NP_651003] [CG6022-RA]	CG6022	CG6022-PA [Drosophila melanogaster]		Dmel_CG6022	GO:6732(coenzyme metabolic process); GO:18063(cytochrome c-heme linkage)	GO:4408(holocytochrome-c synthase activity)	GO:5743(mitochondrial inner membrane)	NM_142746	Dm.6761	42590	KEGG pathway: Porphyrin and chlorophyll metabolism 00860
A_09_P020046	1.79694	0.000148	P	20297.3	11594.6	NM_135203		CG11043-RA	CG11043	fly|CG11043-RA|ref|NM_135203|tc|TC209851	CG11043-PA [Source:RefSeq_peptide;Acc:NP_609047] [CG11043-RA]	CG11043	CG11043-PA [Drosophila melanogaster]	11514451	Dmel_CG11043	GO:6123(mitochondrial electron transport, cytochrome c to oxygen)	GO:4129(cytochrome-c oxidase activity)	GO:5751(mitochondrial respiratory chain complex IV); GO:5739(mitochondrion)	NM_135203	Dm.28037	33919	KEGG pathway: Oxidative phosphorylation 00190
A_09_P043876	1.53947	0.0146061	P	20890.3	13162.1	NM_079683		CG4550-RA	ninaE	fly|CG4550-RA|ref|NM_079683|dgc|RH01460|dgc|HL01686	Opsin Rh1 (Outer R1-R6 photoreceptor cells opsin) (Neither inactivation nor afterpotential E protein). [Source:Uniprot/SWISSPROT;Acc:P06002] [CG4550-RA]	neither inactivation nor afterpotential E	neither inactivation nor afterpotential E CG4550-PA [Drosophila melanogaster]	16756553; 15014127; 14769922; 1339673; 1398053; 1403087; 1422119; 1431838; 1534022; 1551579; 1608933; 1644830; 1689056; 1707759; 1726765; 1833511; 1838762; 1859395; 1913822; 1982113; 2010085; 2105166; 2105491; 2110249; 2117644; 2140105; 2163342; 2361011; 2437266; 2484341; 2521839; 2528612; 2580638; 2768273; 2953598; 2966681; 2968518; 2975615; 2985266; 3040524; 3097245; 3117994; 3930500; 6770840; …	Dmel_CG4550	GO:7186(G-protein coupled receptor protein signaling pathway); GO:8344(adult locomotory behavior); GO:8594(photoreceptor cell morphogenesis); GO:7602(phototransduction); GO:42052(rhabdomere development); GO:7601(visual perception)	GO:8020(G-protein coupled photoreceptor activity); GO:4930(G-protein coupled receptor activity)	GO:16023(cytoplasmic membrane-bound vesicle); GO:16027(inaD signaling complex); GO:16021(integral to membrane); GO:5771(multivesicular body); GO:16028(rhabdomere); GO:5791(rough endoplasmic reticulum); GO:5767(secondary lysosome); GO:16029(subrhabdomeral cisterna)	NM_079683	Dm.6744	42367
A_09_P049426	1.74717	0.0171021	P	21999.3	13268	NM_132951		CG4928-RA	CG4928	fly|CG4928-RA|fly|CG4928-RB|ref|NM_167552|ref|NM_132951	UNC93-like protein. [Source:Uniprot/SWISSPROT;Acc:Q9Y115] [CG4928-RA]	CG4928	CG4928-PA, isoform A [Drosophila melanogaster]	15579698	Dmel_CG4928	GO:6936(muscle contraction)	GO:3674(molecular_function)		NM_167552	Dm.3874	32682
A_09_P132150	0.655411	0.0153155	P	6779.88	10337.1	NM_079024		CG10246-RA	Cyp6a9	fly|CG10246-RA|ref|NM_079024|dgc|SD12535|gb|AY119196	Cytochrome P450 6a9 (EC 1.14.-.-) (CYPVIA9). [Source:Uniprot/SWISSPROT;Acc:Q27594] [CG10246-RA]	Cytochrome P450-6a9	Cytochrome P450-6a9 CG10246-PA [Drosophila melanogaster]	1737575; 7749620; 8973362; 9304797; 9589864; 10021770; 11179683; 11810226; 12586708	Dmel_CG10246	GO:6118(electron transport); GO:17143(insecticide metabolic process); GO:8202(steroid metabolic process)	GO:9055(electron carrier activity); GO:20037(heme binding); GO:5506(iron ion binding); GO:4497(monooxygenase activity)	GO:16020(membrane); GO:5792(microsome)	NM_079024	Dm.632	36663	KEGG pathway: Ascorbate and aldarate metabolism 00053; KEGG pathway: Coumarine and phenylpropanoid biosynthesis 00940; KEGG pathway: Fluorene degradation 00628; KEGG pathway: Limonene and pinene degradation 00903; KEGG pathway: gamma-Hexachlorocyclohexane degradation 00361
A_09_P131005	0.598458	0.00940907	P	12545.1	21666.3	NM_078513		CG4626-RB	fz4	fly|CG4626-RB|fly|CG4626-RA|ref|NM_167119|ref|NM_078513	Protein frizzled-4 precursor (dFz4). [Source:Uniprot/SWISSPROT;Acc:Q9NBW1] [CG4626-RB]	frizzled 4	frizzled 4 CG4626-PB, isoform B [Drosophila melanogaster]	10507837; 10908591; 11335117; 11519072; 12205098	Dmel_CG4626	GO:7186(G-protein coupled receptor protein signaling pathway); GO:16055(Wnt receptor signaling pathway); GO:7267(cell-cell signaling); GO:7163(establishment and/or maintenance of cell polarity); GO:7165(signal transduction)	GO:4930(G-protein coupled receptor activity); GO:42813(Wnt receptor activity); GO:17147(Wnt-protein binding); GO:4926(non-G-protein coupled 7TM receptor activity); GO:4888(transmembrane receptor activity)	GO:16021(integral to membrane); GO:5886(plasma membrane)	NM_167119	Dm.92	31659
A_09_P194020	1.8579	0.0058171	P	4214.46	2293.61	CG8663-RD		CG8663-RD	nrv3	fly|CG8663-RD|fly|CG8663-RC|fly|CG8663-RA|fly|CG8663-RB	nervana 3 CG8663-PA, isoform A [Source:RefSeq_peptide;Acc:NP_610108] [CG8663-RD]
A_09_P170060	1.55538	0.0136827	P	3999.01	2581.77	CG7816-RF		CG7816-RF	CG7816	fly|CG7816-RF|fly|CG7816-RC|fly|CG7816-RG|fly|CG7816-RE	Hypothetical protein CG7816. [Source:Uniprot/SWISSPROT;Acc:Q9VAF0] [CG7816-RF]
A_09_P119495	1.72445	0.00803454	P	25117.4	14344.5	NM_165217		CG6667-RB	Dl	fly|CG6667-RB|fly|CG6667-RA|ref|NM_165218|ref|NM_165217	Embryonic polarity protein dorsal. [Source:Uniprot/SWISSPROT;Acc:P15330] [CG6667-RB]	dorsal	dorsal CG6667-PA, isoform A [Drosophila melanogaster]	17295838; 17035291; 16682822; 16493693; 15975723; 15987775; 16107793; 14607986; 12532402; 12091311; 12077338; 11752406; 1299363; 1322296; 1325392; 1325394; 1339676; 1349523; 1423618; 1423619; 1425342; 1426631; 1426637; 1450511; 1457465; 1518806; 1533515; 1559611; 1582412; 1633426; 1638983; 1644293; 1648449; 1654049; 1655572; 1655573; 1668185; 1672778; 1688006; 1733499; 1739964; 1742496; 1765005; …	Dmel_CG6667	GO:7249(I-kappaB kinase/NF-kappaB cascade); GO:8063(Toll signaling pathway); GO:9952(anterior/posterior pattern formation); GO:6916(anti-apoptosis); GO:6968(cellular defense response); GO:6952(defense response); GO:9950(dorsal/ventral axis specification); GO:9953(dorsal/ventral pattern formation); GO:7398(ectoderm development); GO:1715(ectodermal cell fate specification); GO:7369(gastrulation); G…	GO:3677(DNA binding); GO:3702(RNA polymerase II transcription factor activity); GO:16015(morphogen activity); GO:5515(protein binding); GO:3700(transcription factor activity); GO:16563(transcriptional activator activity); GO:16564(transcriptional repressor activity)	GO:5737(cytoplasm); GO:5634(nucleus)	NM_165217	Dm.3233	35047
A_09_P183115	1.80985	0.00645795	P	15743.1	8708.81	CG8663-RD		CG8663-RD	nrv3	fly|CG8663-RD|fly|CG8663-RC|fly|CG8663-RA|fly|CG8663-RB	nervana 3 CG8663-PA, isoform A [Source:RefSeq_peptide;Acc:NP_610108] [CG8663-RD]
A_09_P188045	1.98194	0.0244134	P	2892.07	1451.92	CG1522-RE		CG1522-RE	cac	fly|CG1522-RE|fly|CG1522-RF|fly|CG1522-RI|fly|CG1522-RJ	Voltage-dependent calcium channel type A alpha-1 subunit (Cacophony protein) (Nightblind A protein) (No-on-transient B protein) (Dmca1A). [Source:Uniprot/SWISSPROT;Acc:P91645] [CG1522-RE]
A_09_P006906	0.650583	0.0147332	P	4372.6	6852.47	CG8529-RA		CG8529-RA	Dyb	fly|CG8529-RA|fly|CG8529-RC|fly|CG8529-RB|fly|CG8529-RE	Dystrobrevin-like CG8529-PA, isoform A [Source:RefSeq_peptide;Acc:NP_725171] [CG8529-RA]
A_09_P050461	1.87892	0.00556505	P	11048.9	6108.35	NM_001032052		CG33715-RE	Msp-300	fly|CG33715-RE|ref|NM_001032052|dgc|LP10936|gb|AY061561	Muscle-specific protein 300 CG33715-PE, isoform E [Source:RefSeq_peptide;Acc:NP_001027223] [CG33715-RE]	Muscle-specific protein 300	Muscle-specific protein 300 CG33715-PD, isoform D [Drosophila melanogaster]	16337624; 1289062; 7732594; 9013930; 9025063; 10908588; 11486054; 11742088; 11779831; 12351791; 12376554; 12408964; 12417656; 12736298; 12888516	Dmel_CG33715	GO:7049(cell cycle); GO:7059(chromosome segregation); GO:910(cytokinesis); GO:7010(cytoskeleton organization and biogenesis); GO:7498(mesoderm development); GO:7067(mitosis)	GO:3779(actin binding); GO:19237(centromeric DNA binding); GO:8092(cytoskeletal protein binding); GO:3725(double-stranded RNA binding); GO:3676(nucleic acid binding)	GO:15629(actin cytoskeleton); GO:8305(integrin complex)	NM_001032051	Dm.20325	3771968
A_09_P009631	1.82188	0.00119054	P	169.901	95.4793	CG8068-RC		CG8068-RC	Su(var)2-10	fly|CG8068-RC|fly|CG8068-RD|fly|CG8068-RA|fly|CG8068-RG	Suppressor of variegation 2-10 CG8068-PA, isoform A [Source:RefSeq_peptide;Acc:NP_523664] [CG8068-RC]
A_09_P040356	1.55341	0.0373002	P	1336.82	864.386	NM_133125		CG7537-RB	inx5	fly|CG7537-RB|ref|NM_133125|gb|AY057372|gb|BT031084	Innexin inx5. [Source:Uniprot/SWISSPROT;Acc:Q9VWL5] [CG7537-RB]	inx5	inx5 CG7537-PB [Drosophila melanogaster]	11340620; 11960713; 11973283; 16139277	Dmel_CG7537	GO:7165(signal transduction)	GO:15286(innexin channel activity)	GO:5921(gap junction); GO:16021(integral to membrane)	NM_133125	Dm.5292	32901
A_09_P131350	0.637136	0.0130381	P	5592.02	8676.13	NM_080359		CG11822-RB	nAcRbeta-21C	fly|CG11822-RB|fly|CG11822-RA|ref|NM_164386|ref|NM_080359	nicotinic acetylcholine receptor beta 21C CG11822-PB, isoform B [Source:RefSeq_peptide;Acc:NP_722638] [CG11822-RB]	nicotinic acetylcholine receptor beta 21C	nicotinic acetylcholine receptor beta 21C CG11822-PB, isoform B [Drosophila melanogaster]	10798390; 11953451; 11973307; 12436418; 12486703; 12820891; 15716490; 15770687; 16077094	Dmel_CG11822	GO:6811(ion transport)	GO:30594(neurotransmitter receptor activity); GO:4889(nicotinic acetylcholine-activated cation-selective channel activity)	GO:5892(nicotinic acetylcholine-gated receptor-channel complex); GO:45211(postsynaptic membrane)	NM_164386	Dm.248	33228
A_09_P046246	0.621078	0.0341853	P	4069.76	6699.23	NM_138146		CG9358-RA	Phk-3	fly|CG9358-RA|ref|NM_138146|dgc|RE09339|gb|AJ697736	Pherokine 3 CG9358-PA [Source:RefSeq_peptide;Acc:NP_611990] [CG9358-RA]	Pherokine 3	Pherokine 3 CG9358-PA [Drosophila melanogaster]	1461284; 2516795; 3089870; 3135183; 7926754; 9017398; 10369659; 10494038; 10822261; 10929403; 11048723; 11529271; 11733057; 12464180; 12505997	Dmel_CG9358	GO:7265(Ras protein signal transduction); GO:8595(determination of anterior/posterior axis, embryo); GO:7369(gastrulation); GO:9993(oogenesis (sensu Insecta)); GO:30707(ovarian follicle cell development (sensu Insecta)); GO:6468(protein amino acid phosphorylation); GO:9617(response to bacterium); GO:7600(sensory perception); GO:7165(signal transduction); GO:7283(spermatogenesis); GO:7362(terminal…	GO:5386(carrier activity); GO:19992(diacylglycerol binding); GO:4672(protein kinase activity); GO:4674(protein serine/threonine kinase activity)	GO:5737(cytoplasm); GO:19897(extrinsic to plasma membrane)	NM_138146	Dm.6160	37997
A_09_P077611	0.59679	0.000146	P	13418.9	22533.4	NM_130615		CG4313-RB	CG4313	fly|CG4313-RB|fly|CG4313-RA|ref|NM_001038735|ref|NM_130615	CG4313-PB, isoform B [Source:RefSeq_peptide;Acc:NP_001033824] [CG4313-RB]	CG4313	CG4313-PB, isoform B [Drosophila melanogaster]	10908591; 11337470; 11519072; 14691551	Dmel_CG4313	GO:7186(G-protein coupled receptor protein signaling pathway)	GO:4930(G-protein coupled receptor activity); GO:1584(rhodopsin-like receptor activity)	GO:16021(integral to membrane); GO:5886(plasma membrane)	NM_001038735	Dm.2215	31169
A_09_P013056	1.66598	0.0474964	P	4742.2	2844.47	CG10844-RA		CG10844-RA	Rya-r44F	fly|CG10844-RA|fly|CG10844-RC|fly|CG10844-RB|fly|CG10844-RD	Ryanodine receptor 44F. [Source:Uniprot/SWISSPROT;Acc:Q24498] [CG10844-RA]
A_09_P211305	1.85473	0.00588758	P	3423.81	1844.21	CG32547-RB		CG32547-RB	CG32547	fly|CG32547-RB|gb|AY240945	This gene is referred to in FlyBase by the symbol CG32547 (FBgn0052547). It has the cytological map location 17B1-17B3. Its sequence location is X:18337843..18356383. Its molecular function is described as neuropeptide receptor activity. It is...
A_09_P064446	1.67649	0.00014	P	2339.65	1415.22	CG31794-RG		CG31794-RG	Pax	fly|CG31794-RG|fly|CG31794-RF|fly|CG31794-RA|fly|CG31794-RC	Paxillin CG31794-PD, isoform D [Source:RefSeq_peptide;Acc:NP_724186] [CG31794-RG]
A_09_P198400	1.64015	0.0102723	P	2195.94	1339.9	NM_079105		CG4084-RA	l(2)not	fly|CG4084-RA|ref|NM_079105|dgc|SD03142|gb|BT024214	Lethal(2)neighbour of tid protein (NOT56) (NOT45). [Source:Uniprot/SWISSPROT;Acc:Q27333] [CG4084-RA]	lethal (2) neighbor of tid	lethal (2) neighbor of tid CG4084-PA [Drosophila melanogaster]	7758246; 8666267; 8809105; 9342399; 9373138; 10368435; 11782446; 12464307; 15020472	Dmel_CG4084		GO:30(mannosyltransferase activity)	GO:30176(integral to endoplasmic reticulum membrane)	NM_079105	Dm.2569	37754	KEGG pathway: Glycan structures - biosynthesis 1 01030; KEGG pathway: N-Glycan biosynthesis 00510
A_09_P195260	2.11081	0.00131174	P	16094.9	7572.97	NM_057693		CG4799-RA	Pen	fly|CG4799-RA|ref|NM_057693|dgc|LD24935|dgc|LP03126	Importin alpha subunit (Karyopherin alpha subunit) (Pendulin). [Source:Uniprot/SWISSPROT;Acc:P52295] [CG4799-RA]	Pendulin	Pendulin CG4799-PA [Drosophila melanogaster]	12490175; 12435357; 7565597; 7749327; 7790349; 7790350; 8224829; 8417324; 8640222; 9391096; 9396726; 9406612; 9491068; 9540809; 10049924; 10471706; 10842307; 10882518; 11116097; 11429277; 11546751; 12019231; 12042820; 12042821; 12408870; 12626737; 12646868; 12655640; 14704178; 15001111; 15204079; 15922834	Dmel_CG4799	GO:6607(NLS-bearing substrate import into nucleus); GO:8283(cell proliferation); GO:16482(cytoplasmic transport); GO:7303(cytoplasmic transport, nurse cell to oocyte); GO:42332(gravitaxis); GO:48542(lymph gland development); GO:7301(ovarian ring canal formation); GO:6606(protein import into nucleus); GO:59(protein import into nucleus, docking); GO:7291(sperm individualization)	GO:8320(protein carrier activity)	GO:15629(actin cytoskeleton); GO:5737(cytoplasm); GO:5643(nuclear pore); GO:5634(nucleus)	NM_057693	Dm.3560	34338
A_09_P056911	1.81274	0.00508407	P	938.552	526.762	NM_139357		CG13788-RA	Gr28b	fly|CG13788-RA|ref|NM_139357|tc|TC203276	Putative gustatory receptor 28b. [Source:Uniprot/SWISSPROT;Acc:Q9VM08] [CG13788-RA]	Gustatory receptor 28b	Gustatory receptor 28b CG13788-PA, isoform A [Drosophila melanogaster]	10710312; 11257221; 11301013; 11516643; 14608037; 15202999; 16139201	Dmel_CG13788	GO:50909(sensory perception of taste)	GO:8527(taste receptor activity)	GO:16021(integral to membrane)	NM_139357	Dm.26373	117496
A_09_P144215	1.52397	0.0153553	P	14884.2	9767.12	NM_080526		CG14028-RA	cype	fly|CG14028-RA|ref|NM_080526|tc|TC215300	cyclope CG14028-PA [Source:RefSeq_peptide;Acc:NP_536787] [CG14028-RA]	cyclope	cyclope CG14028-PA [Drosophila melanogaster]	9258679; 10471706; 10744543; 11014813; 11514451; 12408803; 15200955	Dmel_CG14028	GO:6123(mitochondrial electron transport, cytochrome c to oxygen)	GO:4129(cytochrome-c oxidase activity)	GO:5751(mitochondrial respiratory chain complex IV)	NM_080526	Dm.13877	46040	KEGG pathway: Oxidative phosphorylation 00190
A_09_P033431	0.608182	0.000296	P	15138.7	24443.4	NM_140590		CG5027-RA	CG5027	fly|CG5027-RA|ref|NM_140590|dgc|LD24073|gb|AY051696	CG5027-PA [Source:RefSeq_peptide;Acc:NP_648847] [CG5027-RA]	CG5027	CG5027-PA [Drosophila melanogaster]	12766950; 14963491	Dmel_CG5027		GO:5509(calcium ion binding); GO:9055(electron carrier activity); GO:3756(protein disulfide isomerase activity); GO:15035(protein disulfide oxidoreductase activity)	GO:16021(integral to membrane)	NM_140590	Dm.3366	39775
A_09_P037786	0.637014	0.0130173	P	9357.73	14681.1	NM_080345		CG1697-RB	rho-4	fly|CG1697-RB|fly|CG1697-RA|fly|CG1697-RC|ref|NM_080345	rhomboid-4 CG1697-PC, isoform C [Source:RefSeq_peptide;Acc:NP_727539] [CG1697-RB]	rhomboid-4	rhomboid-4 CG1697-PB, isoform B [Drosophila melanogaster]	10887159; 11023685; 12169630; 15084467	Dmel_CG1697	GO:7398(ectoderm development); GO:7292(female gamete generation); GO:7399(nervous system development)	GO:5509(calcium ion binding); GO:5102(receptor binding); GO:5057(receptor signaling protein activity); GO:8236(serine-type peptidase activity)	GO:16021(integral to membrane); GO:5886(plasma membrane)	NM_080345	Dm.1673	32109
A_09_P122980	1.60241	0.0116013	P	11570.9	7083.18	BG633827		BG633827	CG3621	ug|BG633827|tc|TC212771	AT29760.5prime AT Drosophila melanogaster adult testes pOTB7 Drosophila melanogaster cDNA clone AT29760 5 similar to EG:152A3.7: FBan0003621 located on: X 2E1-2E1;: 04 [BG633827]	CG3621								Dm.5409
A_09_P153315	0.600029	0.0149878	P	82.631	140.202	BT029964		BT029964	Fas3	gb|BT029964|tc|TC219243	Drosophila melanogaster IP17819 full insert cDNA. [BT029964]	Fasciclin 3	IP17819p		FLYBASE:FBgn0000636; GI:124248436					Dm.6733
A_09_P018991	0.609029	0.0341999	P	14841.4	24129.8	NM_134936		CG8843-RA	sec5	fly|CG8843-RA|ref|NM_134936|dgc|SD03467|gb|AY069793	Exocyst complex component 2 (Exocyst complex component Sec5). [Source:Uniprot/SWISSPROT;Acc:Q9VQQ9] [CG8843-RA]	sec5	sec5 CG8843-PA [Drosophila melanogaster]	16224820; 15728258; 15897260; 14681190; 12575951; 10798391; 10908590; 14573476; 15261677; 15380073	Dmel_CG8843	GO:910(cytokinesis); GO:7269(neurotransmitter secretion); GO:16081(synaptic vesicle docking during exocytosis); GO:16080(synaptic vesicle targeting); GO:16192(vesicle-mediated transport)		GO:145(exocyst)	NM_134936	Dm.288	33563
A_09_P213800	0.600196	0.0312974	P	16300.6	28488.8	EL886209		EL886209	ORMDL	ug|EL886209	IP17488.3prime IP Drosophila melanogaster iPCR Amplified Library Drosophila melanogaster cDNA clone IP17488 3, mRNA sequence [EL886209]	ORMDL								Dm.15066
A_09_P065891	1.55184	0.0318254	P	23990.9	16127.3	NM_135877		CG4701-RA	CG4701	fly|CG4701-RA|ref|NM_135877|dgc|AT28104|gb|AY113316	CG4701-PA [Source:RefSeq_peptide;Acc:NP_609721] [CG4701-RA]	CG4701	CG4701-PA [Drosophila melanogaster]	10471707	Dmel_CG4701	GO:6886(intracellular protein transport)	GO:5524(ATP binding); GO:16887(ATPase activity)	GO:5741(mitochondrial outer membrane)	NM_135877	Dm.18497	34858
A_09_P038001	0.607973	0.000495	P	251.234	413.028	NM_167318		CG1786-RA	Cyp318a1	fly|CG1786-RA|ref|NM_167318|dgc|GM14828|gb|AY113358	Probable cytochrome P450 318a1 (EC 1.14.-.-) (CYPCCCXVIIIA1). [Source:Uniprot/SWISSPROT;Acc:Q9VYQ5] [CG1786-RA]	Cyp318a1	Cyp318a1 CG1786-PA [Drosophila melanogaster]	11179683	Dmel_CG1786	GO:6118(electron transport); GO:8202(steroid metabolic process)	GO:9055(electron carrier activity); GO:20037(heme binding); GO:5506(iron ion binding); GO:4497(monooxygenase activity)	GO:16020(membrane); GO:5792(microsome)	NM_167318	Dm.10735	32172	KEGG pathway: Ascorbate and aldarate metabolism 00053; KEGG pathway: Coumarine and phenylpropanoid biosynthesis 00940; KEGG pathway: Fluorene degradation 00628; KEGG pathway: Limonene and pinene degradation 00903; KEGG pathway: gamma-Hexachlorocyclohexane degradation 00361
A_09_P020401	0.617801	0.00636922	P	16625.6	26969.3	NM_135285		CG6730-RA	Cyp4d21	fly|CG6730-RA|ref|NM_135285|dgc|GH25251|gb|AY051608	Probable cytochrome P450 4d21 (EC 1.14.-.-) (CYPIVD21). [Source:Uniprot/SWISSPROT;Acc:Q9VLZ7] [CG6730-RA]	Cyp4d21	Cyp4d21 CG6730-PA [Drosophila melanogaster]	11179683; 11719206; 11733057; 12089325; 12111731; 12355067; 12374736; 12573238; 12958599	Dmel_CG6730	GO:6118(electron transport)	GO:9055(electron carrier activity); GO:20037(heme binding); GO:5506(iron ion binding); GO:4497(monooxygenase activity)	GO:16020(membrane); GO:5792(microsome)	NM_135285	Dm.1463	34036	KEGG pathway: Ascorbate and aldarate metabolism 00053; KEGG pathway: Coumarine and phenylpropanoid biosynthesis 00940; KEGG pathway: Fluorene degradation 00628; KEGG pathway: Limonene and pinene degradation 00903; KEGG pathway: gamma-Hexachlorocyclohexane degradation 00361
A_09_P195965	1.65785	0.00979865	P	2548.1	1513.92	NM_170019		CG5315-RC	CG5315	fly|CG5315-RC|fly|CG5315-RB|fly|CG5315-RA|ref|NM_170019	ADIPOR-like receptor CG5315. [Source:Uniprot/SWISSPROT;Acc:Q9VCY8] [CG5315-RC]	CG5315	CG5315-PA, isoform A [Drosophila melanogaster]		Dmel_CG5315	GO:19395(fatty acid oxidation); GO:9755(hormone-mediated signaling)	GO:42562(hormone binding)	GO:16021(integral to membrane)	NM_142804	Dm.11569	42656
A_09_P041026	0.437951	0.0447673	P,A	35.9611	87.8137	NM_134601		CG1718-RA	CG1718	fly|CG1718-RA|ref|NM_134601|tc|TC195057|tc|TC217559	CG1718-PA [Source:RefSeq_peptide;Acc:NP_608445] [CG1718-RA]	CG1718	CG1718-PA [Drosophila melanogaster]		Dmel_CG1718	GO:6810(transport)	GO:5524(ATP binding); GO:42626(ATPase activity, coupled to transmembrane movement of substances); GO:5215(transporter activity)	GO:43190(ATP-binding cassette (ABC) transporter complex)	NM_134601	Dm.17224	33103
A_09_P041411	1.55333	0.000812	P	810.393	523.619	NM_001042818		CG5055-RA	baz	fly|CG5055-RA|fly|CG5055-RB|ref|NM_078659|ref|NM_001042818	bazooka CG5055-PA [Source:RefSeq_peptide;Acc:NP_523383] [CG5055-RA]	bazooka	bazooka CG5055-PA, isoform A [Drosophila melanogaster]	15456726; 14675534; 14569003; 12225669; 12526793; 8608920; 8698811; 8878687; 9264249; 9876186; 9889099; 10559895; 10591216; 10591217; 10611685; 10662767; 10679433; 10684591; 10688184; 10693757; 10744962; 10753742; 10753746; 10790336; 10809663; 10822259; 10830161; 10830165; 10877696; 10887088; 10980423; 10985375; 10995441; 11076958; 11084352; 11117747; 11117748; 11146625; 11146637; 11146640; 11163…	Dmel_CG5055	GO:45176(apical protein localization); GO:8356(asymmetric cell division); GO:8105(asymmetric protein localization); GO:45175(basal protein localization); GO:7298(border follicle cell migration (sensu Insecta)); GO:910(cytokinesis); GO:7163(establishment and/or maintenance of cell polarity); GO:45197(establishment and/or maintenance of epithelial cell polarity); GO:45196(establishment and/or maint…	GO:5515(protein binding); GO:5080(protein kinase C binding); GO:5198(structural molecule activity)	GO:45179(apical cortex); GO:45177(apical part of cell); GO:16324(apical plasma membrane); GO:16327(apicolateral plasma membrane); GO:5938(cell cortex); GO:5913(cell-cell adherens junction); GO:5737(cytoplasm); GO:35003(subapical complex)	NM_078659	Dm.191	32703
A_09_P221750	1.76235	0.00946427	P	5409.99	3106	CG9660-RA		CG9660-RA	toc	fly|CG9660-RA|fly|CG9660-RB|fly|CG9660-RE|fly|CG9660-RD	toucan CG9660-PB, isoform B [Source:RefSeq_peptide;Acc:NP_722877] [CG9660-RA]
A_09_P010196	0.637228	0.000456	P	3221.84	5131.48	CG12008-RC		CG12008-RC	kst	fly|CG12008-RC|fly|CG12008-RB|fly|CG12008-RA|fly|CG12008-RD	karst CG12008-PC, isoform C [Source:RefSeq_peptide;Acc:NP_995987] [CG12008-RC]
A_09_P024646	0.591604	0.0117792	P	1569.64	2654.28	NM_078920		CG12837-RA	Tsp42Er	fly|CG12837-RA|ref|NM_078920|gb|BT025888|ug|EL869710	Tetraspanin 42Er CG12837-PA [Source:RefSeq_peptide;Acc:NP_523644] [CG12837-RA]	Tetraspanin 42Er	Tetraspanin 42Er CG12837-PA [Drosophila melanogaster]	11122467; 12370414; 14519762; 16061818; 16129837	Dmel_CG12837	GO:7398(ectoderm development); GO:7399(nervous system development); GO:19226(transmission of nerve impulse)	GO:5057(receptor signaling protein activity)	GO:16021(integral to membrane)	NM_078920	Dm.25411	35629
A_09_P107160	0.61493	0.0107816	P	7393.84	11996.8	NM_079137		CG3533-RA	uzip	fly|CG3533-RA|ref|NM_079137|dgc|SD09738|gb|AY052139	Protein unzipped precursor (Protein zipper). [Source:Uniprot/SWISSPROT;Acc:P10379] [CG3533-RA]	unzipped	unzipped CG3533-PA [Drosophila melanogaster]	3402433; 8568878; 9247329; 11529271; 12586708	Dmel_CG3533	GO:7409(axonogenesis)		GO:16021(integral to membrane); GO:5886(plasma membrane)	NM_079137	Dm.3321	38002
A_09_P000351	1.59073	0.0375849	P	543.199	313.061	NM_001031899		CG33639-RA	CG33639	fly|CG33639-RA|ref|NM_001031899|gb|BT029088|tc|TC203234	CG33639-PA [Source:RefSeq_peptide;Acc:NP_001027070] [CG33639-RA]	CG33639	CG33639-PA [Drosophila melanogaster]	10908591; 11381038	Dmel_CG33639	GO:7186(G-protein coupled receptor protein signaling pathway)	GO:8188(neuropeptide receptor activity); GO:1584(rhodopsin-like receptor activity)	GO:16021(integral to membrane)	NM_001031899	Dm.28218	32803
A_09_P042571	1.73523	0.000117	P	1445.66	841.941	NM_206079		CG2204-RA	G-oalpha47A	fly|CG2204-RA|fly|CG2204-RI|ref|NM_078960|ref|NM_206079	Guanine nucleotide-binding protein G(o), alpha subunit 47A. [Source:Uniprot/SWISSPROT;Acc:P16378] [CG2204-RA]	G protein oalpha 47A	G protein oalpha 47A CG2204-PB, isoform B [Drosophila melanogaster]	15652486; 1679453; 1782864; 1910054; 1931484; 2061323; 2108229; 2109694; 2125225; 2509462; 2509463; 2509464; 2519611; 8543167; 8574195; 8612978; 8988178; 9787433; 9866209; 9988773; 10352022; 10753742; 10753746; 10880482; 11486054; 11672526; 11691840; 11742088; 11900973; 11919298; 12006610; 12027431; 12185850; 12925708; 15082549; 15324689; 15617679; 16617104	Dmel_CG2204	GO:7186(G-protein coupled receptor protein signaling pathway); GO:16055(Wnt receptor signaling pathway); GO:8356(asymmetric cell division); GO:1737(establishment of imaginal disc-derived wing hair orientation); GO:7507(heart development)	GO:5525(GTP binding); GO:3924(GTPase activity); GO:4871(signal transducer activity)	GO:5834(heterotrimeric G-protein complex)	NM_165772	Dm.12982	36104
A_09_P052991	0.656584	0.00981455	P	1057.95	1610.36	NM_176284		CG17795-RA	mthl2	fly|CG17795-RA|fly|CG17795-RB|ref|NM_139723|ref|NM_176284	Probable G-protein coupled receptor Mth-like 2 precursor (Protein methuselah-like 2). [Source:Uniprot/SWISSPROT;Acc:Q9VRN2] [CG17795-RA]	methuselah-like 2	methuselah-like 2 CG17795-PA, isoform A [Drosophila melanogaster]	10908591; 11274391; 15133470	Dmel_CG17795	GO:7186(G-protein coupled receptor protein signaling pathway); GO:8340(determination of adult life span); GO:6950(response to stress)	GO:4930(G-protein coupled receptor activity); GO:1584(rhodopsin-like receptor activity)	GO:16021(integral to membrane)	NM_139723	Dm.12868	38636
A_09_P046516	1.65689	0.00972774	P	4680.58	2837.31	NM_132951		CG4928-RA	CG4928	fly|CG4928-RA|fly|CG4928-RB|ref|NM_167552|ref|NM_132951	UNC93-like protein. [Source:Uniprot/SWISSPROT;Acc:Q9Y115] [CG4928-RA]	CG4928	CG4928-PA, isoform A [Drosophila melanogaster]	15579698	Dmel_CG4928	GO:6936(muscle contraction)	GO:3674(molecular_function)		NM_167552	Dm.3874	32682
A_09_P172150	1.72264	0.00813901	P	1700.86	976.988	NM_079866		CG1744-RA	chp	fly|CG1744-RA|ref|NM_079866|ug|AI387933|tc|TC195825	Chaoptin precursor (Photoreceptor cell-specific membrane protein). [Source:Uniprot/SWISSPROT;Acc:P12024] [CG1744-RA]	chaoptic	chaoptic CG1744-PA [Drosophila melanogaster]	1638128; 1685269; 1715870; 1957349; 2108229; 2143163; 2189727; 2449286; 2770860; 3124963; 3920657; 6185380; 6420071; 6818066; 6818557; 7646889; 7707975; 7739382; 7893601; 8187644; 8402919; 8575625; 8994828; 9056770; 9334280; 9459444; 9570770; 9635424; 9796815; 10328780; 10399914; 10460261; 10471707; 10518988; 10545508; 10581287; 10595512; 10648243; 10704843; 10729831; 10804172; 10804181; 10811916…	Dmel_CG1744	GO:7155(cell adhesion); GO:42051(compound eye photoreceptor development); GO:19221(cytokine and chemokine mediated signaling pathway); GO:6952(defense response); GO:7156(homophilic cell adhesion); GO:7601(visual perception)	GO:4872(receptor activity); GO:5198(structural molecule activity)	GO:5886(plasma membrane)	NM_079866	Dm.21698	43690
A_09_P042546	1.58462	0.00296373	P	4069.51	2604.16	CG10545-RE		CG10545-RE	Gbeta13F	fly|CG10545-RE|fly|CG10545-RA|fly|CG10545-RF|fly|CG10545-RD	Guanine nucleotide-binding protein beta subunit 1. [Source:Uniprot/SWISSPROT;Acc:P26308] [CG10545-RE]
A_09_P198705	1.73137	0.0070451	P	4981.76	2834.01	NM_057353		CG9668-RA	Rh4	fly|CG9668-RA|ref|NM_057353|dgc|RH33063|gb|AY113582	Opsin Rh4 (Inner R7 photoreceptor cells opsin). [Source:Uniprot/SWISSPROT;Acc:P08255] [CG9668-RA]	Rhodopsin 4	Rhodopsin 4 CG9668-PA [Drosophila melanogaster]	1398053; 1403087; 1422119; 1726765; 1913822; 1946441; 2105166; 2105491; 2140105; 2163342; 2437266; 2484341; 2952772; 2968518; 7946332; 8005445; 8006992; 8338666; 8901571; 9016446; 9165115; 9275222; 9342399; 9502802; 9679151; 9895309; 10322485; 10368435; 10441750; 10449334; 10508742; 10594055; 10611962; 10908591; 11139510; 11222137; 11231067; 11316611; 11483574; 11519072; 11528479; 11557987; 12136…	Dmel_CG9668	GO:7186(G-protein coupled receptor protein signaling pathway); GO:9589(detection of UV); GO:7602(phototransduction); GO:7604(phototransduction, UV); GO:7601(visual perception)	GO:8020(G-protein coupled photoreceptor activity); GO:4930(G-protein coupled receptor activity)	GO:16021(integral to membrane)	NM_057353	Dm.4810	39887
A_09_P206600	0.645228	0.0183211	P	131.644	202.937	CG31349-RI		CG31349-RI	pyd	fly|CG31349-RI|tc|TC217821	The gene polychaetoid is referred to in FlyBase by the symbol pyd (CG31349, FBgn0003177). It has the cytological map location 85B2-85B7. Its sequence location is 3R:4653200..4756978. Its molecular function is described as: guanylate kinase activity;...
A_09_P204510	1.56946	0.0138422	P,M	694.172	437.425	NM_057551		CG13521-RB	robo	fly|CG13521-RB|fly|CG13521-RA|ref|NM_166543|ref|NM_057551	roundabout CG13521-PB, isoform B [Source:RefSeq_peptide;Acc:NP_726224] [CG13521-RB]	roundabout	roundabout CG13521-PA, isoform A [Drosophila melanogaster]	16888037; 16360689; 15716500; 16341212; 15525663; 15147761; 15056612; 14651924; 12592406; 12397103; 12361590; 7646885; 8087543; 8173326; 8461134; 9443908; 9454347; 9458045; 9459439; 9875845; 9895324; 10102267; 10102268; 10203809; 10206637; 10218152; 10226006; 10230784; 10328928; 10375520; 10395576; 10399909; 10399919; 10479692; 10518986; 10518987; 10521399; 10591202; 10648238; 10679444; 10751187;…	Dmel_CG13521	GO:7411(axon guidance); GO:16199(axon midline choice point recognition); GO:7155(cell adhesion); GO:6952(defense response); GO:48813(dendrite morphogenesis); GO:7398(ectoderm development); GO:35050(embryonic heart tube development); GO:7427(epithelial cell migration, open tracheal system); GO:8038(neuron recognition); GO:7432(salivary gland boundary specification)	GO:4872(receptor activity); GO:4888(transmembrane receptor activity)	GO:5768(endosome); GO:5887(integral to plasma membrane); GO:5886(plasma membrane)	NM_057551	Dm.7485	37603
A_09_P015396	0.63394	0.000203	P	6663.69	10540.9	NM_168212		CG32380-RA	SMSr	fly|CG32380-RA|fly|CG32380-RB|ref|NM_139857|ref|NM_168212	Sphingomyelin synthase-related 1. [Source:Uniprot/SWISSPROT;Acc:Q9VS60] [CG32380-RA]	SMSr	SMSr CG32380-PA, isoform A [Drosophila melanogaster]	14685263; 15956666	Dmel_CG32380	GO:6686(sphingomyelin biosynthetic process)	GO:3674(molecular_function)	GO:16021(integral to membrane)	NM_139857	Dm.874	38823
A_09_P169950	1.58622	0.0122466	P	6685.04	4185.48	NM_143753		CG7007-RA	VhaPPA1-1	fly|CG7007-RA|ref|NM_143753|dgc|GH03514|gb|AY060235	VhaPPA1-1 CG7007-PA [Source:RefSeq_peptide;Acc:NP_652010] [CG7007-RA]	VhaPPA1-1	VhaPPA1-1 CG7007-PA [Drosophila melanogaster]	10340851; 16537387	Dmel_CG7007	GO:15986(ATP synthesis coupled proton transport); GO:6812(cation transport)	GO:46933(hydrogen ion transporting ATP synthase activity, rotational mechanism); GO:46961(hydrogen ion transporting ATPase activity, rotational mechanism); GO:8553(hydrogen-exporting ATPase activity, phosphorylative mechanism)	GO:16469(proton-transporting two-sector ATPase complex); GO:220(vacuolar proton-transporting V-type ATPase, V0 domain)	NM_143753	Dm.4082	45247	KEGG pathway: Oxidative phosphorylation 00190
A_09_P019771	1.56312	0.0027842	P	11299.5	7400.84	NM_135133		CG18340-RB	Ucp4B	fly|CG18340-RB|fly|CG18340-RA|ref|NM_164666|ref|NM_135133	Ucp4B CG18340-PB, isoform B [Source:RefSeq_peptide;Acc:NP_723135] [CG18340-RB]	Ucp4B	Ucp4B CG18340-PA, isoform A [Drosophila melanogaster]	11102375; 11334880; 15972463	Dmel_CG18340	GO:6839(mitochondrial transport); GO:15992(proton transport)	GO:5488(binding); GO:5386(carrier activity); GO:17077(oxidative phosphorylation uncoupler activity)	GO:5740(mitochondrial envelope); GO:5743(mitochondrial inner membrane)	NM_135133	Dm.35065	33833
A_09_P029871	1.87696	0.000888	P	3008.45	1615.51	CG6703-RA		CG6703-RA	Caki	fly|CG6703-RA|fly|CG6703-RB|fly|CG6703-RD|fly|CG6703-RE	Calcium/calmodulin-dependent protein kinase (EC 2.7.11.17) (CAKI) (Peripheral plasma membrane protein CaMGUK). [Source:Uniprot/SWISSPROT;Acc:Q24210] [CG6703-RA]
A_09_P204235	1.59854	0.00785482	P	7377.72	4648.47	NM_134313		CG8048-RB	Vha44	fly|CG8048-RB|fly|CG8048-RA|fly|CG8048-RC|ref|NM_134313	Vacuolar ATP synthase subunit C (EC 3.6.3.14) (V-ATPase C subunit) (Vacuolar proton pump C subunit). [Source:Uniprot/SWISSPROT;Acc:Q9V7N5] [CG8048-RB]	Vacuolar H[+] ATPase 44kD C subunit	Vacuolar H[+] ATPase 44kD C subunit CG8048-PA, isoform A [Drosophila melanogaster]	9050231; 9584098; 10340851; 16157870; 16537387	Dmel_CG8048	GO:15986(ATP synthesis coupled proton transport); GO:15992(proton transport); GO:7557(regulation of juvenile hormone biosynthetic process)	GO:5524(ATP binding); GO:8553(hydrogen-exporting ATPase activity, phosphorylative mechanism)	GO:16469(proton-transporting two-sector ATPase complex); GO:221(vacuolar proton-transporting V-type ATPase, V1 domain)	NM_057918	Dm.7688	36826	KEGG pathway: Oxidative phosphorylation 00190
A_09_P185275	1.56064	0.0134819	P	3361.39	2144.49	NM_001042889		CG6105-RC	l(2)06225	fly|CG6105-RC|ref|NM_001042889|tc|TC214997	The gene lethal (2) 06225 is referred to in FlyBase by the symbol l(2)06225 (CG6105, FBgn0010612). It has the cytological map location 32C1. Its sequence location is 2L:10975533..10977006. Its molecular function is described as: hydrogen-exporting...	lethal (2) 06225	lethal (2) 06225 CG6105-PC, isoform C [Drosophila melanogaster]	10231582; 10471706; 11854309; 15118106	Dmel_CG6105	GO:15986(ATP synthesis coupled proton transport); GO:6118(electron transport); GO:6119(oxidative phosphorylation); GO:15992(proton transport)	GO:46933(hydrogen ion transporting ATP synthase activity, rotational mechanism); GO:46961(hydrogen ion transporting ATPase activity, rotational mechanism); GO:8553(hydrogen-exporting ATPase activity, phosphorylative mechanism)	GO:276(mitochondrial proton-transporting ATP synthase complex, coupling factor F(o))	NM_001042889	Dm.7708	46069	KEGG pathway: Oxidative phosphorylation 00190
A_09_P043301	1.51692	0.0377623	P	9577.01	6332.65	NM_057268		CG6944-RA	Lam	fly|CG6944-RA|ref|NM_057268|dgc|LD38055|gb|X07278	Lamin Dm0. [Source:Uniprot/SWISSPROT;Acc:P08928] [CG6944-RA]	Lamin	Lamin CG6944-PA [Drosophila melanogaster]	16897461; 17148572; 15996653; 16254246; 1527167; 1572892; 1756740; 1846370; 1909954; 2115522; 2123469; 2171967; 2194675; 2492999; 2517292; 3126192; 3624309; 3919018; 6414883; 7593280; 7657722; 7841458; 8314904; 8537453; 8543167; 8601487; 8603728; 8657280; 8666268; 8713624; 8744953; 8907705; 9013881; 9133429; 9166402; 9199347; 9215899; 9285817; 9321398; 9372441; 9394018; 9427247; 9431987; 9531544;…	Dmel_CG6944	GO:7417(central nervous system development); GO:40003(chitin-based cuticle development); GO:1745(compound eye morphogenesis); GO:7010(cytoskeleton organization and biogenesis); GO:48546(digestive tract morphogenesis); GO:35262(gonad morphogenesis); GO:7084(mitotic nuclear envelope reassembly); GO:6998(nuclear membrane organization and biogenesis); GO:7097(nuclear migration); GO:7430(terminal bran…	GO:5515(protein binding); GO:5200(structural constituent of cytoskeleton)	GO:5638(lamin filament)	NM_057268	Dm.312	33782	KEGG pathway: Cell Communication 01430
A_09_P166110	1.93582	0.00399437	P	15138.9	7793.46	NM_057693		CG4799-RA	Pen	fly|CG4799-RA|ref|NM_057693|dgc|LD24935|dgc|LP03126	Importin alpha subunit (Karyopherin alpha subunit) (Pendulin). [Source:Uniprot/SWISSPROT;Acc:P52295] [CG4799-RA]	Pendulin	Pendulin CG4799-PA [Drosophila melanogaster]	12490175; 12435357; 7565597; 7749327; 7790349; 7790350; 8224829; 8417324; 8640222; 9391096; 9396726; 9406612; 9491068; 9540809; 10049924; 10471706; 10842307; 10882518; 11116097; 11429277; 11546751; 12019231; 12042820; 12042821; 12408870; 12626737; 12646868; 12655640; 14704178; 15001111; 15204079; 15922834	Dmel_CG4799	GO:6607(NLS-bearing substrate import into nucleus); GO:8283(cell proliferation); GO:16482(cytoplasmic transport); GO:7303(cytoplasmic transport, nurse cell to oocyte); GO:42332(gravitaxis); GO:48542(lymph gland development); GO:7301(ovarian ring canal formation); GO:6606(protein import into nucleus); GO:59(protein import into nucleus, docking); GO:7291(sperm individualization)	GO:8320(protein carrier activity)	GO:15629(actin cytoskeleton); GO:5737(cytoplasm); GO:5643(nuclear pore); GO:5634(nucleus)	NM_057693	Dm.3560	34338
A_09_P164870	1.80837	0.00564698	P	2567.67	1418.83	NM_136629		CG10843-RA	Cyp4p3	fly|CG10843-RA|ref|NM_136629|dgc|AT13968|gb|AY075201	Probable cytochrome P450 4p3 (EC 1.14.-.-) (CYPIVP3). [Source:Uniprot/SWISSPROT;Acc:Q9V559] [CG10843-RA]	Cyp4p3	Cyp4p3 CG10843-PA [Drosophila melanogaster]	11179683; 15324670	Dmel_CG10843	GO:6118(electron transport); GO:8202(steroid metabolic process)	GO:9055(electron carrier activity); GO:20037(heme binding); GO:5506(iron ion binding); GO:4497(monooxygenase activity)	GO:16020(membrane); GO:5792(microsome)	NM_136629	Dm.5612	35948	KEGG pathway: Ascorbate and aldarate metabolism 00053; KEGG pathway: Coumarine and phenylpropanoid biosynthesis 00940; KEGG pathway: Fluorene degradation 00628; KEGG pathway: Limonene and pinene degradation 00903; KEGG pathway: gamma-Hexachlorocyclohexane degradation 00361
A_09_P064356	0.664394	0.0174954	P	96.1793	147.479	NM_168163		CG32401-RA	Or65a	fly|CG32401-RA|ref|NM_168163|tc|TC203882	Putative odorant receptor 65a. [Source:Uniprot/SWISSPROT;Acc:P82982] [CG32401-RA]	Odorant receptor 65a	Odorant receptor 65a CG32401-PA [Drosophila melanogaster]	10943835; 10943836; 11914382; 12782114; 14608037; 15210116; 16139208; 16139209	Dmel_CG32401	GO:7608(sensory perception of smell)	GO:5549(odorant binding); GO:4984(olfactory receptor activity)	GO:16021(integral to membrane)	NM_168163	Dm.26516	318011
A_09_P191745	2.0033	0.00440863	P	4711.97	2345.83	NM_057693		CG4799-RA	Pen	fly|CG4799-RA|ref|NM_057693|dgc|LD24935|dgc|LP03126	Importin alpha subunit (Karyopherin alpha subunit) (Pendulin). [Source:Uniprot/SWISSPROT;Acc:P52295] [CG4799-RA]	Pendulin	Pendulin CG4799-PA [Drosophila melanogaster]	12490175; 12435357; 7565597; 7749327; 7790349; 7790350; 8224829; 8417324; 8640222; 9391096; 9396726; 9406612; 9491068; 9540809; 10049924; 10471706; 10842307; 10882518; 11116097; 11429277; 11546751; 12019231; 12042820; 12042821; 12408870; 12626737; 12646868; 12655640; 14704178; 15001111; 15204079; 15922834	Dmel_CG4799	GO:6607(NLS-bearing substrate import into nucleus); GO:8283(cell proliferation); GO:16482(cytoplasmic transport); GO:7303(cytoplasmic transport, nurse cell to oocyte); GO:42332(gravitaxis); GO:48542(lymph gland development); GO:7301(ovarian ring canal formation); GO:6606(protein import into nucleus); GO:59(protein import into nucleus, docking); GO:7291(sperm individualization)	GO:8320(protein carrier activity)	GO:15629(actin cytoskeleton); GO:5737(cytoplasm); GO:5643(nuclear pore); GO:5634(nucleus)	NM_057693	Dm.3560	34338
A_09_P216345	0.644585	0.0205186	P	123.066	189.288	NM_001043073		CG30054-RD	CG30054	fly|CG30054-RD|ref|NM_001043073|ens|CG30054-RB|tc|TC205370	This gene is referred to in FlyBase by the symbol CG30054 (FBgn0050054). It has the cytological map location 49B9. Its sequence location is 2R:8511225..8512857. Its molecular function is described as: GTP binding; GTPase activity; signal transducer...	CG30054	CG30054-PC [Drosophila melanogaster]		Dmel_CG30054	GO:7186(G-protein coupled receptor protein signaling pathway); GO:30097(hemopoiesis); GO:7498(mesoderm development); GO:6471(protein amino acid ADP-ribosylation); GO:50909(sensory perception of taste)	GO:5525(GTP binding); GO:3924(GTPase activity); GO:4871(signal transducer activity)	GO:5834(heterotrimeric G-protein complex)	NM_001043073	Dm.33112	246420
A_09_P224995	1.55986	0.0135169	P	2211.79	1410.5	NM_165694		CG18345-RB	trpl	fly|CG18345-RB|fly|CG18345-RA|fly|CG18345-RC|ref|NM_165694	Transient-receptor-potential-like protein. [Source:Uniprot/SWISSPROT;Acc:P48994] [CG18345-RB]	trp-like	trp-like CG18345-PA, isoform A [Drosophila melanogaster]	17190901; 16787936; 11931743; 1314616; 7516156; 7531160; 7680430; 7694408; 7695998; 7832780; 8570597; 8574574; 8621686; 8640222; 8646774; 8663982; 8670063; 8670154; 8794093; 8918461; 8939592; 8943075; 8986787; 9003779; 9010208; 9038807; 9215637; 9223679; 9230432; 9301336; 9351965; 9354808; 9363946; 9427248; 9494079; 9679151; 9681185; 9687357; 9687362; 9697865; 9813038; 9930700; 10070252; 10371201…	Dmel_CG18345	GO:6816(calcium ion transport); GO:19722(calcium-mediated signaling); GO:7589(fluid secretion); GO:9628(response to abiotic stimulus); GO:9416(response to light stimulus)	GO:5262(calcium channel activity); GO:5516(calmodulin binding); GO:5261(cation channel activity); GO:8086(light-activated voltage-gated calcium channel activity); GO:15279(store-operated calcium channel activity)	GO:5887(integral to plasma membrane); GO:5886(plasma membrane); GO:16028(rhabdomere)	NM_057547	Dm.546	36003
A_09_P020306	1.52427	0.0153917	P	4468.41	2958.89	NM_078777		CG4675-RB	Ndae1	fly|CG4675-RB|fly|CG4675-RA|ref|NM_164744|ref|NM_078777	Na+-driven anion exchanger 1 CG4675-PB, isoform B [Source:RefSeq_peptide;Acc:NP_723264] [CG4675-RB]	Na[+]-driven anion exchanger 1	Na[+]-driven anion exchanger 1 CG4675-PA, isoform A [Drosophila melanogaster]	9491068; 10827195; 11443044; 11529271; 14729156; 15020472; 15282158; 15944359; 16284119	Dmel_CG4675	GO:6820(anion transport); GO:15701(bicarbonate transport); GO:6821(chloride transport); GO:15992(proton transport); GO:6814(sodium ion transport)	GO:15380(anion exchanger activity); GO:15106(bicarbonate transporter activity); GO:8324(cation transporter activity); GO:5452(inorganic anion exchanger activity); GO:8510(sodium:bicarbonate symporter activity)	GO:16021(integral to membrane); GO:5886(plasma membrane)	NM_078777	Dm.7104	34005
A_09_P033271	0.620699	0.000296	P	15331.9	24987.3	NM_206146		CG9635-RF	RhoGEF2	fly|CG9635-RF|fly|CG9635-RD|fly|CG9635-RE|ref|NM_206146	RhoGEF2 CG9635-PF, isoform F [Source:RefSeq_peptide;Acc:NP_995868] [CG9635-RF]	RhoGEF2	RhoGEF2 CG9635-PF, isoform F [Drosophila melanogaster]	17202187; 17234948; 15689371; 15699213; 15498490; 15498489; 12421711; 8978055; 9428514; 9436986; 9822573; 9927420; 10047521; 10369659; 10471706; 10556060; 10559939; 10850494; 10880486; 11076763; 11525834; 11702944; 11874917; 12593803; 14668390; 14668391; 14972681; 15238529; 15269282; 15572110; 15834142; 16123312	Dmel_CG9635	GO:6306(DNA methylation); GO:7015(actin filament organization); GO:7375(anterior midgut invagination); GO:6915(apoptosis); GO:7155(cell adhesion); GO:7049(cell cycle); GO:7010(cytoskeleton organization and biogenesis); GO:7369(gastrulation); GO:7377(germ-band extension); GO:6886(intracellular protein transport); GO:7242(intracellular signaling cascade); GO:16331(morphogenesis of embryonic epithel…	GO:3677(DNA binding); GO:5089(Rho guanyl-nucleotide exchange factor activity); GO:19992(diacylglycerol binding); GO:5515(protein binding)	GO:5622(intracellular)	NM_206146	Dm.2959	36915
A_09_P052076	2.11624	0.00368044	P	4391.94	2071.08	CG10701-RD		CG10701-RD	Moe	fly|CG10701-RD|fly|CG10701-RF|fly|CG10701-RE|fly|CG10701-RI	Moesin/ezrin/radixin homolog 1 (Ezrin-moesin-radixin 1) (Protein D17) (Protein moesin) (dMoesin). [Source:Uniprot/SWISSPROT;Acc:P46150] [CG10701-RD]
A_09_P067616	1.59187	0.000253	P	4554.75	2860.69	NM_132092		CG3869-RA	Marf	fly|CG3869-RA|fly|CG3869-RC|fly|CG3869-RB|ref|NM_132092	Transmembrane GTPase Marf (EC 3.6.5.-) (Mitochondrial assembly regulatory factor) (Mitofusin). [Source:Uniprot/SWISSPROT;Acc:Q7YU24] [CG3869-RA]	Mitochondrial assembly regulatory factor	Mitochondrial assembly regulatory factor CG3869-PA, isoform A [Drosophila melanogaster]	12128227	Dmel_CG3869	GO:8053(mitochondrial fusion); GO:7005(mitochondrion organization and biogenesis); GO:6626(protein targeting to mitochondrion)	GO:5525(GTP binding); GO:3924(GTPase activity); GO:19204(nucleotide phosphatase activity)	GO:16021(integral to membrane); GO:5740(mitochondrial envelope); GO:5741(mitochondrial outer membrane); GO:5886(plasma membrane)	NM_132092	Dm.11038	31581
A_09_P044496	0.613145	0.00379329	P,A	74.2154	119.203	NM_080051		CG1214-RA	ru	fly|CG1214-RA|ref|NM_080051|dgc|LP02893|gb|AF318284	roughoid CG1214-PA [Source:RefSeq_peptide;Acc:NP_524790] [CG1214-RA]	roughoid	roughoid CG1214-PA [Drosophila melanogaster]	15229181; 575634; 2499514; 2511049; 2852141; 5722790; 6407004; 8077114; 8620860; 8759316; 8964464; 9435287; 9636184; 10837218; 10887159; 10934048; 11023685; 11454766; 11504926; 11880339; 11973283; 12123607; 12169630; 12181552; 12181568; 12221285; 12223409; 12408803; 12636917; 12655063; 12820957; 14507785; 14711872; 15084467; 15744048; 16123311	Dmel_CG1214	GO:7398(ectoderm development); GO:7173(epidermal growth factor receptor signaling pathway); GO:7427(epithelial cell migration, open tracheal system); GO:7292(female gamete generation); GO:7479(leg disc proximal/distal pattern formation); GO:7399(nervous system development)	GO:5102(receptor binding); GO:5057(receptor signaling protein activity); GO:8236(serine-type peptidase activity)	GO:16021(integral to membrane); GO:5887(integral to plasma membrane); GO:5886(plasma membrane)	NM_080051	Dm.1452	44856
A_09_P047821	1.61219	0.0069355	P	20357.8	12512.3	NM_163892		CG32491-RS	mod(mdg4)	fly|CG32491-RS|ref|NM_163892|gb|BT029677|gb|AJ277179	Modifier of mdg4. [Source:Uniprot/SWISSPROT;Acc:Q86B87] [CG32491-RS]	modifier of mdg4	modifier of mdg4 CG32491-PR, isoform R [Drosophila melanogaster]	17101769; 16628226; 15846993; 15520256; 12856417; 12723696; 12783795; 11973303; 1446816; 1473720; 2162761; 2558282; 7613086; 7637775; 7664338; 7761470; 7780729; 7935842; 7958847; 8248257; 8382174; 8405976; 8639163; 8722175; 8790337; 8842142; 8852842; 8978055; 8985188; 9017397; 9111355; 9130717; 9178008; 9286681; 9362473; 9439572; 9491892; 9504920; 9590167; 9649529; 9878044; 9880764; 9927464; 1020…	Dmel_CG32491	GO:6333(chromatin assembly or disassembly); GO:6325(establishment and/or maintenance of chromatin architecture); GO:8354(germ cell migration); GO:6917(induction of apoptosis); GO:6997(nuclear organization and biogenesis); GO:9993(oogenesis (sensu Insecta)); GO:42981(regulation of apoptosis); GO:1672(regulation of chromatin assembly or disassembly); GO:6357(regulation of transcription from RNA pol…	GO:3702(RNA polymerase II transcription factor activity); GO:3682(chromatin binding); GO:8195(phosphatidate phosphatase activity); GO:5515(protein binding)	GO:785(chromatin); GO:5634(nucleus); GO:5886(plasma membrane); GO:5700(polytene chromosome)	NM_163877	Dm.20407	49228	KEGG pathway: Ether lipid metabolism 00565; KEGG pathway: Glycerolipid metabolism 00561; KEGG pathway: Glycerophospholipid metabolism 00564; KEGG pathway: Sphingolipid metabolism 00600
A_09_P219730	1.58676	0.00916841	P	7387.48	4693.83	NM_169475		CG17369-RB	Vha55	fly|CG17369-RB|fly|CG17369-RA|ref|NM_057560|ref|NM_169475	Vacuolar ATP synthase subunit B (EC 3.6.3.14) (V-ATPase B subunit) (Vacuolar proton pump B subunit) (V-ATPase 57 kDa subunit). [Source:Uniprot/SWISSPROT;Acc:P31409] [CG17369-RB]	Vacuolar H[+]-ATPase 55kD B subunit	Vacuolar H[+]-ATPase 55kD B subunit CG17369-PB, isoform B [Drosophila melanogaster]	16735441; 411575; 3141923; 7498743; 7498774; 7713433; 8005411; 8005412; 8098166; 8541220; 8940044; 9050231; 9144216; 9409831; 9647634; 9724781; 9832527; 9883586; 9895321; 10340851; 10471706; 11007492; 11396999; 11810228; 12727233; 15196554; 16157870; 16537387	Dmel_CG17369	GO:15986(ATP synthesis coupled proton transport); GO:6928(cell motility); GO:7010(cytoskeleton organization and biogenesis); GO:15988(energy coupled proton transport, against electrochemical gradient); GO:15992(proton transport); GO:6144(purine base metabolic process)	GO:5524(ATP binding); GO:46933(hydrogen ion transporting ATP synthase activity, rotational mechanism); GO:46961(hydrogen ion transporting ATPase activity, rotational mechanism); GO:8553(hydrogen-exporting ATPase activity, phosphorylative mechanism)	GO:16469(proton-transporting two-sector ATPase complex); GO:221(vacuolar proton-transporting V-type ATPase, V1 domain)	NM_057560	Dm.7889	41550	KEGG pathway: Oxidative phosphorylation 00190
A_09_P176985	1.50977	0.0145911	P	2131.63	1404.26	NM_135751		CG5075-RA	CG5075	fly|CG5075-RA|ref|NM_135751|gb|BT031085|tc|TC208607	CG5075-PA [Source:RefSeq_peptide;Acc:NP_609595] [CG5075-RA]	CG5075	CG5075-PA [Drosophila melanogaster]	14602076	Dmel_CG5075	GO:15986(ATP synthesis coupled proton transport); GO:6812(cation transport); GO:6144(purine base metabolic process)	GO:5524(ATP binding); GO:46933(hydrogen ion transporting ATP synthase activity, rotational mechanism); GO:46961(hydrogen ion transporting ATPase activity, rotational mechanism); GO:8553(hydrogen-exporting ATPase activity, phosphorylative mechanism)	GO:16469(proton-transporting two-sector ATPase complex); GO:221(vacuolar proton-transporting V-type ATPase, V1 domain)	NM_135751	Dm.7785	34695	KEGG pathway: Oxidative phosphorylation 00190
A_09_P045856	1.51847	0.0165735	P	312.773	202.747	CG4905-RA		CG4905-RA	Syn2	fly|CG4905-RA|fly|CG4905-RD|fly|CG4905-RB|fly|CG4905-RE	Syntrophin-like 2 CG4905-PE, isoform E [Source:RefSeq_peptide;Acc:NP_788381] [CG4905-RA]
A_09_P054641	0.512927	0.00146543	P,A	60.0079	123.748	NM_140133		CG14157-RA	Or67d	fly|CG14157-RA|ref|NM_140133|tc|TC204412	Putative odorant receptor 67d. [Source:Uniprot/SWISSPROT;Acc:Q9VT92] [CG14157-RA]	Or67d	Or67d CG14157-PA [Drosophila melanogaster]	17392786; 11914382; 12782114; 14608037; 16139208; 16139209	Dmel_CG14157	GO:7186(G-protein coupled receptor protein signaling pathway); GO:7608(sensory perception of smell)	GO:5549(odorant binding); GO:4984(olfactory receptor activity)	GO:16021(integral to membrane)	NM_140133	Dm.27107	39191
A_09_P010581	0.631716	0.00248372	P	8511.03	13781.3	CG17759-RA		CG17759-RA	Galpha49B	fly|CG17759-RA|fly|CG17759-RG|fly|CG17759-RC|fly|CG17759-RB	Guanine nucleotide-binding protein G(q) subunit alpha (Guanine nucleotide-binding protein alpha-q) (dGQalpha). [Source:Uniprot/SWISSPROT;Acc:P23625] [CG17759-RA]
A_09_P194995	1.85695	0.00581421	P	11421.4	6099.59	CG8663-RD		CG8663-RD	nrv3	fly|CG8663-RD|fly|CG8663-RC|fly|CG8663-RA|fly|CG8663-RB	nervana 3 CG8663-PA, isoform A [Source:RefSeq_peptide;Acc:NP_610108] [CG8663-RD]
A_09_P164390	1.50088	0.028185	P	2180.74	1457.41	NM_080192		CG10449-RA	Catsup	fly|CG10449-RA|ref|NM_080192|dgc|LD23513|gb|AF216584	Protein catecholamines up. [Source:Uniprot/SWISSPROT;Acc:Q9V3A4] [CG10449-RA]	Catecholamines up	Catecholamines up CG10449-PA [Drosophila melanogaster]	16682353; 826448; 1783295; 3007281; 6425116; 6790250; 7859742; 8176361; 8647399; 8683095; 9115734; 9892357; 10231582; 10471706; 10471719; 12702650; 15189334; 15454546; 15509557	Dmel_CG10449	GO:30001(metal ion transport); GO:7300(nurse cell to oocyte transport (sensu Insecta)); GO:42069(regulation of catecholamine metabolic process)	GO:46873(metal ion transporter activity)	GO:5887(integral to plasma membrane)	NM_080192	Dm.12530	48805
A_09_P216885	1.53493	0.0380267	P	2226.74	1502.4	NM_001042822		CG34120-RC	CG34120	fly|CG34120-RC|ref|NM_001042822|gb|BT021460|ens|CG1819-RA	This gene is referred to in FlyBase by the symbol CG34120 (FBgn0083956). Its sequence location is X:20994980..21011285. Its molecular function is described as: ATPase activity, coupled to transmembrane movement of substances; transporter activity; ATP...	CG34120	CG34120-PC, isoform C [Drosophila melanogaster]		Dmel_CG34120	GO:6810(transport)	GO:5524(ATP binding); GO:42626(ATPase activity, coupled to transmembrane movement of substances); GO:5215(transporter activity)	GO:43190(ATP-binding cassette (ABC) transporter complex)	NM_001042822	Dm.17233	318066
A_09_P056861	1.8205	0.00343512	P	807.473	446.537	NM_169314		CG31405-RA	Gr85a	fly|CG31405-RA|ref|NM_169314|tc|TC204280	Putative gustatory receptor 85a. [Source:Uniprot/SWISSPROT;Acc:Q8INM9] [CG31405-RA]	Gustatory receptor 85a	Gustatory receptor 85a CG31405-PA [Drosophila melanogaster]	11516643; 15377795; 16139201	Dmel_CG31405	GO:50909(sensory perception of taste)	GO:8527(taste receptor activity)	GO:16021(integral to membrane)	NM_169314	Dm.26363	117475
A_09_P044301	2.22883	1.33e-05	P	666.317	292.411	CG31349-RH		CG31349-RH	pyd	fly|CG31349-RH	The gene polychaetoid is referred to in FlyBase by the symbol pyd (CG31349, FBgn0003177). It has the cytological map location 85B2-85B7. Its sequence location is 3R:4653200..4756978. Its molecular function is described as: guanylate kinase activity;...
A_09_P191350	0.525774	0.00573888	P	90.0726	184.584	NM_078960		CG2204-RA	G-oalpha47A	fly|CG2204-RA|ref|NM_078960|dgc|RH09776|gb|M29732	Guanine nucleotide-binding protein G(o), alpha subunit 47A. [Source:Uniprot/SWISSPROT;Acc:P16378] [CG2204-RA]	G protein oalpha 47A	G protein oalpha 47A CG2204-PB, isoform B [Drosophila melanogaster]	15652486; 1679453; 1782864; 1910054; 1931484; 2061323; 2108229; 2109694; 2125225; 2509462; 2509463; 2509464; 2519611; 8543167; 8574195; 8612978; 8988178; 9787433; 9866209; 9988773; 10352022; 10753742; 10753746; 10880482; 11486054; 11672526; 11691840; 11742088; 11900973; 11919298; 12006610; 12027431; 12185850; 12925708; 15082549; 15324689; 15617679; 16617104	Dmel_CG2204	GO:7186(G-protein coupled receptor protein signaling pathway); GO:16055(Wnt receptor signaling pathway); GO:8356(asymmetric cell division); GO:1737(establishment of imaginal disc-derived wing hair orientation); GO:7507(heart development)	GO:5525(GTP binding); GO:3924(GTPase activity); GO:4871(signal transducer activity)	GO:5834(heterotrimeric G-protein complex)	NM_165772	Dm.12982	36104
A_09_P043841	0.630351	0.000765	P	1033.12	1608.58	CG11988-RA		CG11988-RA	neur	fly|CG11988-RA|fly|CG11988-RB|fly|CG11988-RC|fly|CG11988-RD	Protein neuralized. [Source:Uniprot/SWISSPROT;Acc:P29503] [CG11988-RA]
A_09_P064131	1.86501	0.00139662	P	875.287	475.615	NM_176570		CG33083-RA	Gr97a	fly|CG33083-RA|ref|NM_176570|tc|TC203785|tc|TC205736	Putative gustatory receptor 97a. [Source:Uniprot/SWISSPROT;Acc:Q8IMQ6] [CG33083-RA]	Gustatory receptor 97a	Gustatory receptor 97a CG33083-PA [Drosophila melanogaster]	10710312; 16139201	Dmel_CG33083	GO:50909(sensory perception of taste)	GO:8527(taste receptor activity)	GO:16021(integral to membrane)	NM_176570	Dm.23043	117338
A_09_P064826	1.90078	3.66e-05	P	12306.4	6413.08	NM_132339		CG32701-RA	l(1)G0320	fly|CG32701-RA|ref|NM_132339|dgc|LD26546|gb|AY069541	lethal (1) G0320 CG32701-PA [Source:RefSeq_peptide;Acc:NP_572567] [CG32701-RA]	lethal (1) G0320	lethal (1) G0320 CG32701-PA [Drosophila melanogaster]	11744370	Dmel_CG32701	GO:6605(protein targeting); GO:6412(translation); GO:16192(vesicle-mediated transport)	GO:5509(calcium ion binding); GO:5048(signal sequence binding)	GO:5785(signal recognition particle receptor complex)	NM_132339	Dm.2084	326234
A_09_P154670	2.24674	0.00308392	P	7241.39	3320.59	CG8048-RD		CG8048-RD	Vha44	fly|CG8048-RD|fly|CG8048-RC|fly|CG8048-RB|fly|CG8048-RA	Vacuolar ATP synthase subunit C (EC 3.6.3.14) (V-ATPase C subunit) (Vacuolar proton pump C subunit). [Source:Uniprot/SWISSPROT;Acc:Q9V7N5] [CG8048-RD]
A_09_P166140	1.56164	0.0104435	P	4665.53	3004.81	CG32490-RQ		CG32490-RQ	cpx	fly|CG32490-RQ|dgc|GH27718|dgc|RH26459|gb|AY121629	The gene complexin is referred to in FlyBase by the symbol cpx (CG32490, FBgn0041605). It has the cytological map location 82A1-82A3. Its sequence location is 3R:106001..128309. Its molecular function is described as: neurotransmitter transporter...
A_09_P206290	1.59254	0.0119462	P	6307.28	3980.69	NM_057655		CG9160-RB	mtacp1	fly|CG9160-RB|fly|CG9160-RA|ref|NM_057654|ref|NM_057655	Acyl carrier protein, mitochondrial precursor (ACP) (NADH-ubiquinone oxidoreductase 9.6 kDa subunit) (NADH-ubiquinone oxidoreductase acyl- carrier subunit). [Source:Uniprot/SWISSPROT;Acc:Q94519] [CG9160-RB]	mitochondrial acyl carrier protein 1	mitochondrial acyl carrier protein 1 CG9160-PB, isoform B [Drosophila melanogaster]	10071211; 10394906; 10471706; 11035778	Dmel_CG9160	GO:6633(fatty acid biosynthetic process); GO:6120(mitochondrial electron transport, NADH to ubiquinone)	GO:8137(NADH dehydrogenase (ubiquinone) activity); GO:3954(NADH dehydrogenase activity); GO:36(acyl carrier activity); GO:48037(cofactor binding); GO:31177(phosphopantetheine binding)	GO:5747(mitochondrial respiratory chain complex I); GO:5739(mitochondrion)	NM_057654	Dm.3108	38154	KEGG pathway: Oxidative phosphorylation 00190
A_09_P031866	1.57684	0.0127356	P	3188.55	2021.57	NM_167152		CG2286-RA	ND75	fly|CG2286-RA|fly|CG2286-RB|ref|NM_078528|ref|NM_167152	NADH-ubiquinone oxidoreductase 75 kDa subunit, mitochondrial precursor (EC 1.6.5.3) (EC 1.6.99.3) (Complex I-75Kd) (CI-75Kd). [Source:Uniprot/SWISSPROT;Acc:Q94511] [CG2286-RA]	NADH:ubiquinone reductase 75kD subunit precursor	NADH:ubiquinone reductase 75kD subunit precursor CG2286-PB, isoform B [Drosophila melanogaster]	10071211; 11404335; 11792861; 11989683; 14711877; 15020472; 15324670	Dmel_CG2286	GO:6120(mitochondrial electron transport, NADH to ubiquinone)	GO:8137(NADH dehydrogenase (ubiquinone) activity); GO:3954(NADH dehydrogenase activity); GO:9055(electron carrier activity); GO:5506(iron ion binding); GO:16740(transferase activity)	GO:5747(mitochondrial respiratory chain complex I)	NM_167152	Dm.6840	31762	KEGG pathway: Oxidative phosphorylation 00190
A_09_P059381	1.54974	0.000758	P	7674.05	5001.78	NM_169828		CG31229-RA	CG31229	fly|CG31229-RA|ref|NM_169828|gb|AY846390|gb|BT022379	Mitochondrial import inner membrane translocase subunit Tim22. [Source:Uniprot/SWISSPROT;Acc:Q8IN78] [CG31229-RA]	CG31229	CG31229-PA [Drosophila melanogaster]		Dmel_CG31229	GO:6626(protein targeting to mitochondrion)	GO:15450(protein translocase activity)	GO:5744(mitochondrial inner membrane presequence translocase complex)	NM_169828	Dm.23788	318636
A_09_P166870	1.79781	0.00301664	P	2517.67	1395.34	NM_136899		CG8453-RA	Cyp6g1	fly|CG8453-RA|ref|NM_136899|gb|AY081960|gb|BT023908	Cytochrome P450 6g1 (EC 1.14.-.-) (CYPVIG1) (Cyp6-like protein). [Source:Uniprot/SWISSPROT;Acc:Q9V674] [CG8453-RA]	Cyp6g1	Cyp6g1 CG8453-PA [Drosophila melanogaster]	17134855; 12351787; 414959; 1593009; 10021770; 11095759; 11102367; 11179683; 11726925; 11810226; 12032070; 12144699; 12351778; 12364796; 12417656; 12559957; 12826097; 14745026; 15036810; 15056610; 15118106; 15120086; 15324670; 16085476; 16120680	Dmel_CG8453	GO:6118(electron transport); GO:46680(response to DDT); GO:17085(response to insecticide); GO:46683(response to organophosphorus)	GO:9055(electron carrier activity); GO:20037(heme binding); GO:5506(iron ion binding); GO:4497(monooxygenase activity)	GO:16020(membrane); GO:5792(microsome)	NM_136899	Dm.3866	36316	KEGG pathway: Ascorbate and aldarate metabolism 00053; KEGG pathway: Coumarine and phenylpropanoid biosynthesis 00940; KEGG pathway: Fluorene degradation 00628; KEGG pathway: Limonene and pinene degradation 00903; KEGG pathway: gamma-Hexachlorocyclohexane degradation 00361
A_09_P050976	1.55343	0.0254189	P	30169.6	20172.8	NM_001032052		CG33715-RE	Msp-300	fly|CG33715-RE|ref|NM_001032052|dgc|GH02446|gb|BT003623	Muscle-specific protein 300 CG33715-PE, isoform E [Source:RefSeq_peptide;Acc:NP_001027223] [CG33715-RE]	Muscle-specific protein 300	Muscle-specific protein 300 CG33715-PD, isoform D [Drosophila melanogaster]	16337624; 1289062; 7732594; 9013930; 9025063; 10908588; 11486054; 11742088; 11779831; 12351791; 12376554; 12408964; 12417656; 12736298; 12888516	Dmel_CG33715	GO:7049(cell cycle); GO:7059(chromosome segregation); GO:910(cytokinesis); GO:7010(cytoskeleton organization and biogenesis); GO:7498(mesoderm development); GO:7067(mitosis)	GO:3779(actin binding); GO:19237(centromeric DNA binding); GO:8092(cytoskeletal protein binding); GO:3725(double-stranded RNA binding); GO:3676(nucleic acid binding)	GO:15629(actin cytoskeleton); GO:8305(integrin complex)	NM_001032051	Dm.20325	3771968
A_09_P043811	1.7532	0.0441861	P	8651.31	5155.32	CG5670-RE		CG5670-RE	Atpalpha	fly|CG5670-RE|fly|CG5670-RB|fly|CG5670-RH|fly|CG5670-RC	Sodium/potassium-transporting ATPase alpha chain (EC 3.6.3.9) (Sodium pump) (Na+/K+ ATPase). [Source:Uniprot/SWISSPROT;Acc:P13607] [CG5670-RE]
A_09_P160725	1.59995	0.0117327	P	1716.7	1067.81	NM_132281		CG34344-RB	rdgA	fly|CG34344-RB|ref|NM_132281|dgc|RH08828|gb|BT009959	The gene retinal degeneration A is referred to in FlyBase by the symbol rdgA (CG34344, FBgn0085373). It has the cytological map location 8B8-8C3. Its sequence location is X:8806401..8919837. Its molecular function is described as: diacylglycerol...	CG12660	CG12660-PA [Drosophila melanogaster]		Dmel_CG12660				NM_132281	Dm.33868	31820
A_09_P173140	1.77805	0.00694022	P	15930.1	9083.61	NM_132090		CG3446-RA	CG3446	fly|CG3446-RA|ref|NM_132090|dgc|RE14725|gb|AY071078	CG3446-PA [Source:RefSeq_peptide;Acc:NP_572318] [CG3446-RA]	CG3446	CG3446-PA [Drosophila melanogaster]		Dmel_CG3446	GO:6120(mitochondrial electron transport, NADH to ubiquinone)	GO:3954(NADH dehydrogenase activity)	GO:5747(mitochondrial respiratory chain complex I)	NM_132090	Dm.5358	31578
A_09_P192825	0.653731	0.0368229	P,A	67.0175	101.275	NM_134601		CG1718-RA	CG1718	fly|CG1718-RA|ref|NM_134601|tc|TC218762|tc|TC195057	CG1718-PA [Source:RefSeq_peptide;Acc:NP_608445] [CG1718-RA]	CG1718	CG1718-PA [Drosophila melanogaster]		Dmel_CG1718	GO:6810(transport)	GO:5524(ATP binding); GO:42626(ATPase activity, coupled to transmembrane movement of substances); GO:5215(transporter activity)	GO:43190(ATP-binding cassette (ABC) transporter complex)	NM_134601	Dm.17224	33103
A_09_P048346	1.58214	0.0174708	P	152.273	96.9974	NM_206690		CG1817-RD	Ptp10D	fly|CG1817-RD|fly|CG1817-RB|fly|CG1817-RA|ref|NM_206690	Tyrosine-protein phosphatase 10D precursor (EC 3.1.3.48) (Receptor- linked protein-tyrosine phosphatase 10D) (DPTP10D). [Source:Uniprot/SWISSPROT;Acc:P35992] [CG1817-RD]	Protein tyrosine phosphatase 10D	Protein tyrosine phosphatase 10D CG1817-PA, isoform A [Drosophila melanogaster]	17442824; 1657401; 1657402; 7527841; 7808409; 7961789; 8226938; 8562420; 8663981; 9271427; 9372917; 9529614; 9699458; 10069336; 10415342; 10648238; 10669758; 10940550; 11179878; 11301252; 11381037; 11684671; 11814553; 12014990; 12932322; 15617679; 16213816	Dmel_CG1817	GO:6470(protein amino acid dephosphorylation)	GO:4896(hematopoietin/interferon-class (D200-domain) cytokine receptor activity); GO:4721(phosphoprotein phosphatase activity); GO:4725(protein tyrosine phosphatase activity); GO:4728(receptor signaling protein tyrosine phosphatase activity); GO:5001(transmembrane receptor protein tyrosine phosphatase activity)	GO:5886(plasma membrane)	NM_206691	Dm.7386	32115
A_09_P150090	2.27931	0.0124129	P,A	83.7471	35.6821	NM_169853		CG3619-RB	Dl	fly|CG3619-RB|ref|NM_169853|dgc|LD21369|dgc|LD19584	Neurogenic locus protein delta precursor. [Source:Uniprot/SWISSPROT;Acc:P10041] [CG3619-RB]	Delta	Delta CG3619-PA, isoform A [Drosophila melanogaster]	17215308; 17065551; 17107776; 16542648; 16487968; 16459304; 16459303; 15760463; 15579696; 15576412; 15469974; 15469967; 15020426; 14654840; 12954721; 14536057; 12632175; 12603025; 14627723; 9651468; 12591935; 12175491; 12230979; 1295737; 1333807; 1339662; 1339674; 1365402; 1383233; 1418999; 1419850; 1482114; 1482116; 1496555; 1525506; 1525515; 1551482; 1577196; 1618155; 1652801; 1657403; 1668185;…	Dmel_CG3619	GO:7219(Notch signaling pathway); GO:7464(R3/R4 cell fate commitment); GO:45465(R8 cell differentiation); GO:7015(actin filament organization); GO:48800(antennal morphogenesis); GO:7475(apposition of dorsal and ventral imaginal disc-derived wing surfaces); GO:8356(asymmetric cell division); GO:8407(bristle morphogenesis); GO:7155(cell adhesion); GO:1708(cell fate specification); GO:8283(cell prol…	GO:5112(Notch binding); GO:5509(calcium ion binding); GO:5102(receptor binding); GO:4871(signal transducer activity)	GO:16021(integral to membrane); GO:5886(plasma membrane)	NM_057916	Dm.7687	42313	KEGG pathway: Notch signaling pathway 04330
A_09_P041021	1.62803	0.000303	P	1500.46	910.708	NM_134600		CG1494-RA	CG1494	fly|CG1494-RA|ref|NM_134600|tc|TC195260	CG1494-PA [Source:RefSeq_peptide;Acc:NP_608444] [CG1494-RA]	CG1494	CG1494-PA [Drosophila melanogaster]	11744370	Dmel_CG1494	GO:6810(transport)	GO:5524(ATP binding); GO:42626(ATPase activity, coupled to transmembrane movement of substances); GO:5215(transporter activity)	GO:43190(ATP-binding cassette (ABC) transporter complex)	NM_134600	Dm.17225	33102
A_09_P185680	1.58814	0.0131057	P	4443.43	2938.61	CG34416-RK		CG34416-RK	Ank2	fly|CG34416-RK|fly|CG34416-RJ|fly|CG34416-RF|fly|CG34416-RL	This gene is referred to in FlyBase by the symbol Ank2 (CG34416, FBgn0085445). It has the cytological map location 66A10. Its sequence location is 3L:7648480..7711439. Its molecular function is described as: structural constituent of cytoskeleton;...
A_09_P202040	1.52209	0.0155478	P	17586.6	11512.4	NM_167247		CG16944-RC	sesB	fly|CG16944-RC|fly|CG16944-RD|ref|NM_167246|ref|NM_167247	ADP,ATP carrier protein (ADP/ATP translocase) (Adenine nucleotide translocator) (ANT) (Stress sensitive B protein). [Source:Uniprot/SWISSPROT;Acc:Q26365] [CG16944-RC]	stress-sensitive B	stress-sensitive B CG16944-PA, isoform A [Drosophila melanogaster]	16076285; 14668379; 1387687; 2499512; 3080355; 3091446; 4999628; 6479445; 6770227; 6790246; 6806144; 7520869; 9647634; 9720289; 9755207; 10511565; 10747067; 11139510; 11404335; 11744370; 11779831; 12015603; 12424521; 12912909	Dmel_CG16944	GO:15866(ADP transport); GO:15867(ATP transport); GO:6812(cation transport); GO:7629(flight behavior); GO:6139(nucleobase, nucleoside, nucleotide and nucleic acid metabolic process); GO:9612(response to mechanical stimulus)	GO:5471(ATP:ADP antiporter activity); GO:5488(binding); GO:5386(carrier activity)	GO:16021(integral to membrane); GO:5740(mitochondrial envelope); GO:5743(mitochondrial inner membrane)	NM_078554	Dm.21507	32007
A_09_P173130	1.52788	0.0152659	P	2075.73	1347.68	NM_078563		CG18361-RB	dsh	fly|CG18361-RB|fly|CG18361-RA|ref|NM_167279|ref|NM_078563	Segment polarity protein dishevelled. [Source:Uniprot/SWISSPROT;Acc:P51140] [CG18361-RB]	dishevelled	dishevelled CG18361-PA, isoform A [Drosophila melanogaster]	16251968; 15937478; 12756182; 12354775; 12479810; 12072470; 12015986; 1365886; 1482116; 1688007; 2225066; 2471660; 2499512; 3089870; 3091446; 3095163; 3803719; 6790246; 6806144; 7529201; 7547463; 7555730; 7600981; 7649396; 7661853; 7671798; 7744250; 7749327; 7813765; 7896146; 7906389; 7907277; 7950320; 7954794; 7958461; 7984239; 8049466; 8049470; 8049482; 8080429; 8107779; 8149913; 8162860; 82417…	Dmel_CG18361	GO:7464(R3/R4 cell fate commitment); GO:16055(Wnt receptor signaling pathway); GO:6928(cell motility); GO:1745(compound eye morphogenesis); GO:7391(dorsal closure); GO:7394(dorsal closure, elongation of leading edge cells); GO:7398(ectoderm development); GO:7163(establishment and/or maintenance of cell polarity); GO:48106(establishment of body bristle orientation); GO:45198(establishment of epith…	GO:5112(Notch binding)	GO:5912(adherens junction); GO:5737(cytoplasm)	NM_078563	Dm.2927	32078	KEGG pathway: Notch signaling pathway 04330; KEGG pathway: Wnt signaling pathway 04310

[truncated: 9 more sheets: 15630, 31966, 5739, 5634, 5886, 502, 5578, 5840, 5774]
